# Supplementary material for: Natural Variation of Chalk9 Regulates Grain Chalkiness in Rice
Source: Research Square preprint supplement (doi:10.21203/rs.3.rs-5850266/v1), 2025-01-29
Supplement: Supplementary file 1 [file 3f83d6df820a520e07a19f0b.xlsx]

## Sheet: Supplementary Table 1
Supplementary Table 1. Chalky grain rate and degree of chalkiness of 175 indica accessions in two years.
Accession	Country	CGR (%, 2021)	DGC (%, 2021)	CGR (%, 2023)	DGC (%, 2023)
909	China	46.3	14.16	33.55	10.75
WD-18495	Cuba	27.59	3.07	2.01	0.43
WD-18547	Cuba	9.63	1.64	3.7	0.8
IR72	Philippines	5.45	2.36	6.17	1.26
3037	China	25	6.03	6.31	7.2
Ezhong4	China	13.04	4.19	8.41	1.9
Qimiaoxiang	China	27.53	5.97	9.35	7.3
Nanzhengao	China	10.68	3.24	9.92	2.38
Hongmeizao	China	22.9	5.83	10.34	8.88
Zhenfu8	Korea	36.99	10.92	10.69	11.9
Zhongxiang1	China	28.36	5.68	11.56	6.3
Ganwanxian9	China	43.97	6.24	11.82	6.8
Secano do Brazil	Brazil	31.4	7.87	12.81	9.4
Molixiangzhan	China	33.33	7.33	13.16	6.84
Nanjing16	China	31.85	8.31	13.82	3.16
Guibaxuan	China	27.05	2.99	14.36	2.05
WD-17862	India	27.21	10.6	14.89	1.83
Chin Chin	China	40	5.53	15.46	5.6
WD-18366	Australia	45	5.98	15.49	6.1
WD-17556	Bangladesh	15	2.71	15.52	2.92
WD-16161	Colombia	50	10.58	16.8	4.08
WD-14097	Indonesia	19.4	8.38	17.33	6.98
Jinyou1	China	13.81	4.16	17.79	3.29
Sanjiang1	China	14.47	4.9	18.15	3.42
Dichroa Alef Uslkij	India	48.42	13.47	18.22	4.56
Dular	India	21.01	3.75	18.28	3.67
IR 9660-48-1-1-2	Philippines	23.53	4.11	19.21	3.45
Qisiruanzhan	China	59.54	18.06	19.57	14.68
CNTLR80076-44-1-1-1	China	45.32	11.2	20.18	11.8
Zhonghan221	China	29.34	8.06	20.42	4.68
9311	China	11.9	5.44	20.74	9.1
Dangyu3	China	30.99	5.98	21.09	5.5
IR661-1	Philippines	28.77	4.06	21.54	3.58
Lengshuinuo	China	42.75	10.94	22.47	10.9
Dongnong424	China	26.34	11.14	22.69	10.42
Xiangsimiao2	China	45.45	10.89	22.83	12.3
Miyang50	Korea	30.97	7.64	24.52	7
Shuiyuan262	Korea	37.72	13.6	25.32	12.3
E32	China	29.6	10.17	25.6	11.3
ECIA76-S89-1	China	37.65	11.08	26.2	12.5
Aoqingzhan	China	36.52	7.35	26.38	5.88
Xinfengzhan2	China	37.7	12.23	26.47	11.8
Hexi41	China	20.56	8.6	26.54	7.89
Xibainian	China	26.8	10.78	26.8	10.78
Huangsiguizhan	China	60.45	19.58	27.05	17.5
Huanglvzhan	China	40.15	12.35	27.76	13.5
Changsizhan	China	55.49	13.82	27.82	13.87
Wuxiangxian	China	37.06	12.99	27.98	12.1
Xiangzaoxian12	China	54.9	11.58	28.13	11.12
Shimla Early	India	30.12	4.73	28.8	4.66
Gu154	China	39.87	12.19	29.56	10.8
Bolvguangnian	China	73.83	21.79	29.96	18.45
W400	China	22.9	5.83	30.34	8.88
Yangdao3	China	39.55	6.76	31.51	6.85
V6	Japan	37.5	10.5	31.74	9.85
Yuxiangzhan	China	28.85	5.77	31.79	9.4
Huangkedao	America	56.39	18.11	31.91	25.36
EMBRAPA 1200	Brazil	38.73	7.85	32.45	6.33
Huaxianzhan	China	49.04	15.68	32.51	17.14
Newrex	Philippines	55.91	20.32	33.25	19.26
BuleidaA-75	Italy	74.8	20.1	34.02	25.6
Eyi105	China	47.85	10.44	34.07	17.84
Yangfuxian2	China	67.67	21.45	34.9	13.6
Xiangzaoxian22	China	39.13	11.6	35.47	12.01
Jinfeng14	China	21.58	6.72	35.55	6.66
Chengnongshuijing	China	53.39	12.54	35.69	13.5
Zhendao886	China	44.6	18.26	35.79	28.75
Baoxie7B	China	47.48	15.48	36.69	16.35
Shengyou2	China	52.41	17.06	37.02	10.47
Shuiyuan137	Korea	34.06	8.48	38.34	9.41
WD-16376	Australia	36.43	6.47	38.58	10.07
Red Khosha Cerma	Bangladesh	58.78	15.96	38.71	19.5
WD-16370	Australia	36.81	8.17	39.11	9.92
Peiai64	China	44.25	13.69	39.45	14.79
Shaner59	China	33.54	10.36	39.47	11.6
Bakiella 1	Bulgaria	76.74	26.12	39.58	20.18
Qisizao3	China	49.7	16.12	39.93	18.5
WD-17403	Indonesia	43.72	10.46	40.36	13.5
IR 58614-B-B-8-2	Philippines	55.22	15.9	40.93	16.52
HB-6-2	China	61.11	21.6	41.15	16.45
Miyang46	Korea	45.4	17.18	41.38	16.83
Lua Chua Chan	China	48.5	13.6	42.09	8.34
Texianzhan13	China	49.38	11.46	43.13	13.1
IR64	Philippines	66.42	21.95	43.64	13.01
Dongtingwanxian	China	74.59	23.72	43.67	23.85
Yangdao4	China	39.9	17.32	44.62	16.99
4484	China	74.24	22.17	45.11	19.45
JWR 221	China	54.92	20.66	45.19	10.53
Jumli dhan	Nepal	69.87	20.2	45.45	12.22
Xiangwanxian1	China	59.44	12.08	46.21	15.6
Yan91-3	China	47.92	17.86	46.56	12.63
Louwanxian2	China	50	15.68	47.27	18.14
Mabaojin	China	79.8	27.84	47.87	24.8
Changzao105	China	84.35	32.63	48	13.57
WD-16343	Uganda	37.21	10.67	48.03	13.18
RP2151-173-1-8	Uzbekistan	33.48	12.59	48.41	13.19
R084	China	21.04	8.37	50.14	15.8
Habataki	Japan	55.91	19.48	50.26	17.93
Teqing	China	50.97	15.36	50.34	16.26
Yuegui146	China	59.68	16.71	50.5	10.91
Fuwan23	China	27.59	11.48	50.58	12.81
WD-16372	Australia	46.24	10.39	50.6	14.36
Qixiuzhan3	China	49.51	15.6	51.75	17.38
Raowan6	China	79.43	25.33	52.61	23.6
WD-14995	India	65.16	21.22	54.5	16.47
Jiazao1	China	46.51	15.32	55.45	16.78
Nongdu4	China	56.15	15.2	55.81	18.27
Tranoeup Beykher	India	49.19	8.14	56.32	15.97
WD-18937	India	69.03	19.98	56.44	16.58
Zhongyu1	China	68.23	16.52	56.8	20.1
Zhengui9	China	68.11	15.51	56.9	16.21
Mancang515	China	78.87	23.19	56.94	24.5
Jiahezaozhan	China	68.91	27.88	57.31	26.1
Yangdao8	China	55.13	18.52	58.25	24.26
Xiangwanxian7	China	42.64	15.6	58.82	20.35
Xiangzaoxian45	China	82.83	27.51	59.62	17.1
Ganzaoxian33	China	68.6	17.25	60.67	15.39
Gui630	China	82.67	31.29	60.8	32.5
Zhenxian232	China	59.63	19.67	61.1	22.8
SML242	China	58.9	16.47	61.4	17.36
Qingliuai1	China	55.06	20.69	62.2	20.98
W385	China	57.14	20.16	63.14	23.5
Xieqingzao	China	45.11	12.23	64.11	29.8
Jinnante43B	China	75.42	26.42	64.14	26.2
A 152	China	69.77	15.34	64.52	16.8
Laian19	China	60.45	21.38	65.8	23.51
Liaohe12	China	86.86	35.14	66.5	21.95
Yuexinzhan5	China	63.89	21.97	66.76	24.4
R6547	China	67.12	27.53	66.77	22.1
XiangaiB	China	83.23	26.11	67.14	28.45
WD-16374	America	62.35	24.14	67.5	29.27
Tesanai2	China	77.22	31.68	68.43	25.84
WD-18334	America	62.5	15.34	68.79	25.28
Yanhui559	China	64.54	28.19	68.79	28.97
Hongwan5202	China	81.3	29.82	69.4	28.29
Hongwan1	China	70.15	23.5	70.21	26.35
WD-18360	Australia	72.73	23.23	71	21.16
Zhenzhuai	China	73.47	20.93	71.4	25.35
WD-14166	Indonesia	42.28	11.77	71.63	21.22
Wuziluosi215	Uzbekistan	63.76	17.8	72.13	19.68
BKN 6987-68-14	China	66.54	26.58	72.18	28.39
81-280	China	87.35	33.19	72.31	33.51
Taizhongbendi1	China	68.04	18.22	74.09	16.18
Xinqingai	China	91.07	37.94	74.21	31.53
Jiuyunwan1	China	88.39	31.09	74.39	38.32
Guichao2	China	73.17	24.06	76.4	27.37
Zaoshuxianghei	China	56.54	19.58	77.72	25.11
Safut Khosha	Kingdom of Saudi Arabia	65.45	31.67	77.86	36.16
Xiangzhou7	China	99.3	41.05	78.12	43.1
Zhaierdao	China	81.42	33.75	79.35	37.08
WD-13959	Australia	82.66	24.38	80.1	23.6
Aituogu151	China	97.06	36.93	82.13	28.41
Yiai1	China	90.4	39.81	82.4	30.8
4595	China	82.96	37.1	82.72	39.38
Shuanggui1	China	96.69	42.01	85.33	43.2
Guangluai4	China	80.95	25.27	86.9	25.95
Wenguangqing	China	97.56	41.02	87.63	41.56
Aizhejiuxuan	China	87.84	37.51	88.19	35.88
Meiguodao	China	78.64	32.64	89	38.8
Xianghui91269	China	97.66	41.01	89.07	45.6
Zaoshu691	China	89.59	37.86	89.21	36.09
Qinglian3	China	89.14	38.37	89.54	35.2
Liusha1	China	100	48.29	89.94	41.11
Zhuguang29	China	99.39	43.5	90.4	46.5
Luke3	China	91.24	32.95	93.01	39.37
Hongmisandan	China	86.69	34.78	94.14	33.9
Aimakang	China	98.52	47.12	96.54	42.52
Bobayong1	China	93.41	42.14	97.86	48.6
TAINUNG45	China	90.83	36.7	98.26	32.44
Longtefu	China	79.12	32.65	98.46	30.5
Chengduai3	China	75.16	31.5	98.62	31.7
Hongse90	China	92.91	30.59	98.63	43.24
Mijifu	China	99.4	41.18	99.32	41.2
W398	China	95	38.7	99.55	31.5
Cocodrie	America	83.21	34.71	99.63	32.8

## Sheet: Supplementary table 2
Supplementary Table 2. Annotation of significant SNPs associated with the grain chalkiness in the candidate region.
Chr.	Position (bp)	pvalue	Ref	Alt	Gene ID	Type	aa Position	Ref.aa	Alt.aa	Annotation
9	19464561	7.5319e-07	G	T	LOC_Os09g32620	promoter_variant				dehydrogenase
9	19491029	5.3256e-07	T	C		intergenic_region
9	19491034	1.7691e-07	G	A		intergenic_region
9	19491040	7.3809e-07	G	A		intergenic_region
9	19496855	8.7695e-07	T	C		intergenic_region
9	19500193	2.9199e-07	T	C	LOC_Os09g32680	intron_variant				cyclin
9	19502844	7.5502e-07	A	G	LOC_Os09g32680	3_prime_UTR_variant				cyclin
9	19503015	6.9589e-08	C	T	LOC_Os09g32680	3_prime_UTR_variant				cyclin
9	19503114	2.4401e-08	G	C	LOC_Os09g32680	3_prime_UTR_variant				cyclin
9	19506938	1.3009e-07	A	G	LOC_Os09g32680	intron_variant				cyclin
9	19508050	7.3642e-07	G	A	LOC_Os09g32700	missense_variant	188	Gly	Asp	expressed protein
9	19508485	6.0568e-07	C	T	LOC_Os09g32700	intron_variant				expressed protein
9	19509107	6.3873e-07	A	G	LOC_Os09g32700	3_prime_UTR_variant				expressed protein
9	19510683	4.8924e-07	G	A	LOC_Os09g32710	intron_variant				expressed protein
9	19516378	9.3288e-08	G	A		intergenic_region
9	19518405	1.1073e-07	G	A		intergenic_region
9	19520859	1.5616e-08	C	T	LOC_Os09g32730	promoter_variant				zinc finger, C3HC4 type domain containing protein
9	19527469	4.8967e-11	A	G	LOC_Os09g32740	intron_variant				ubiquitin carboxyl-terminal hydrolase family protein
9	19528008	2.3119e-08	C	T	LOC_Os09g32740	promoter_variant				ubiquitin carboxyl-terminal hydrolase family protein
9	19528396	7.4262e-09	C	G	LOC_Os09g32740	promoter_variant				ubiquitin carboxyl-terminal hydrolase family protein
9	19528437	9.227e-09	C	T	LOC_Os09g32740	promoter_variant				ubiquitin carboxyl-terminal hydrolase family protein
9	19528629	5.7119e-08	G	A	LOC_Os09g32740	promoter_variant				ubiquitin carboxyl-terminal hydrolase family protein
9	19528660	8.389e-08	G	A	LOC_Os09g32740	promoter_variant				ubiquitin carboxyl-terminal hydrolase family protein
9	19528681	1.7906e-08	C	C	LOC_Os09g32740	promoter_variant				ubiquitin carboxyl-terminal hydrolase family protein
9	19530333	7.4626e-09	C	T		intergenic_region
9	19530821	9.5919e-08	C	G		intergenic_region
9	19531759	1.5642e-08	C	A	LOC_Os09g32750	promoter_variant				FHA domain containing protein
9	19534997	1.1188e-08	T	C	LOC_Os09g32750	5_prime_UTR				FHA domain containing protein
9	19535137	1.7273e-10	G	A	LOC_Os09g32750	intron_variant				FHA domain containing protein
9	19535361	1.8118e-08	C	G	LOC_Os09g32750	intron_variant				FHA domain containing protein
9	19536079	7.2471e-12	C	A	LOC_Os09g32750	intron_variant				FHA domain containing protein
9	19536543	5.085e-07	T	C	LOC_Os09g32750	intron_variant				FHA domain containing protein
9	19536685	2.4816e-09	T	A	LOC_Os09g32750	intron_variant				FHA domain containing protein
9	19537805	3.7231e-09	C	T	LOC_Os09g32750	intron_variant				FHA domain containing protein
9	19538558	3.3984e-09	C	T	LOC_Os09g32750	intron_variant				FHA domain containing protein
9	19540282	5.684e-09	A	T	LOC_Os09g32750	intron_variant				FHA domain containing protein
9	19540442	4.0214e-09	C	A	LOC_Os09g32750	missense_variant	301	Pro	Thr	FHA domain containing protein
9	19540751	9.1905e-09	C	T	LOC_Os09g32750	intron_variant				FHA domain containing protein
9	19540934	1.1583e-09	A	T	LOC_Os09g32750	intergenic_region				FHA domain containing protein
9	19541351	7.9758e-07	G	C	LOC_Os09g32750	intergenic_region
9	19542070	3.6683e-09	G	A	LOC_Os09g32760	synonymous_variant	349	Thr	Thr	acyl-ACP thioesterase
9	19542911	2.2551e-07	C	G	LOC_Os09g32760	intron_variant				acyl-ACP thioesterase
9	19544385	7.8402e-07	C	T	LOC_Os09g32760	intron_variant				acyl-ACP thioesterase
9	19544623	6.0492e-07	A	G	LOC_Os09g32760	intron_variant				acyl-ACP thioesterase
9	19544894	7.5923e-10	G	T	LOC_Os09g32760	intron_variant				acyl-ACP thioesterase
9	19545141	2.0572e-08	T	C	LOC_Os09g32760	missense_variant	61	Ser	Gly	acyl-ACP thioesterase
9	19545653	3.9158e-07	G	T	LOC_Os09g32760	promoter_variant				acyl-ACP thioesterase
9	19547135	6.0022e-07	C	G	LOC_Os09g32760	promoter_variant				acyl-ACP thioesterase
9	19548660	4.6931e-07	C	T	LOC_Os09g32760	promoter_variant				acyl-ACP thioesterase
9	19550030	2.8089e-08	T	C	LOC_Os09g32770	intron_variant				auxin efflux carrier component
9	19565822	2.1356e-09	C	G	LOC_Os09g32810	promoter_variant				ribulose-phosphate 3-epimerase
9	19566955	1.4471e-07	G	C	LOC_Os09g32810	missense_variant	14	Leu	Phe	ribulose-phosphate 3-epimerase
9	19570194	8.0347e-10	A	T	LOC_Os09g32820	missense_variant	24	Glu	Val	uridine/cytidine kinase-like 1
9	19573553	4.6565e-07	G	T	LOC_Os09g32820	intron_variant				uridine/cytidine kinase-like 1
9	19578994	5.2551e-08	T	C	LOC_Os09g32830	intron_variant				nucleotide pyrophosphatase/phosphodiesterase
9	19580487	2.4471e-09	G	A	LOC_Os09g32830	missense_variant	480	Val	Met	nucleotide pyrophosphatase/phosphodiesterase
9	19586699	6.7028e-07	G	A	LOC_Os09g32840	promoter_variant				nucleotide pyrophosphatase/phosphodiesterase
9	19589531	6.9616e-10	C	T	LOC_Os09g32860	promoter_variant				OsFBX335 - F-box domain containing protein
9	19594487	8.2288e-08	C	T	LOC_Os09g32870	intron_variant				OsFBX336 - F-box domain containing protein
9	19594914	5.1805e-07	G	C	LOC_Os09g32870	intron_variant				OsFBX336 - F-box domain containing protein
9	19595299	5.746e-07	C	T	LOC_Os09g32870	intron_variant				OsFBX336 - F-box domain containing protein
9	19595616	3.7947e-07	C	T	LOC_Os09g32870	intron_variant				OsFBX336 - F-box domain containing protein
9	19595804	1.4005e-07	G	A	LOC_Os09g32870	intron_variant				OsFBX336 - F-box domain containing protein
9	19595809	3.8602e-07	T	C	LOC_Os09g32870	intron_variant				OsFBX336 - F-box domain containing protein
9	19595926	3.8602e-07	G	A	LOC_Os09g32870	missense_variant	99	Gly	Arg	OsFBX336 - F-box domain containing protein
9	19596046	7.4789e-09	G	A	LOC_Os09g32870	intron_variant				OsFBX336 - F-box domain containing protein
9	19596072	2.5407e-07	G	A	LOC_Os09g32870	intron_variant				OsFBX336 - F-box domain containing protein
9	19596349	3.9946e-08	G	A	LOC_Os09g32870	missense_variant	149	Asp	Asn	OsFBX336 - F-box domain containing protein
9	19596384	3.1543e-08	C	A	LOC_Os09g32870	missense_variant	160	Asn	Lys	OsFBX336 - F-box domain containing protein
9	19597736	5.9932e-08	T	G		intergenic_region				OsFBX336 - F-box domain containing protein
9	19598158	3.8897e-07	C	T		intergenic_region
9	19598638	4.7518e-07	G	A		intergenic_region
9	19600768	5.2113e-08	G	A	LOC_Os09g32880	stop_gained	57	Arg	*	retrotransposon protein
9	19612109	5.0227e-08	G	A		intergenic_region
9	19615765	3.3859e-08	G	A	LOC_Os09g32910	intron_variant				OsFBX337 - F-box domain containing protein
9	19620132	2.4497e-08	G	A	LOC_Os09g32920	missense_variant	17	Leu	Phe	expressed protein

## Sheet: Supplementary Table 3
Supplementary Table 3. Annotation of candidate genes on Chromosome 9 associated with the grain chalkiness by MSU Rice Genome Annotation Project Release 7.
Locus	ID	Location	Description
LOC_Os09g32620	Ⅰ	Chr9: 19464671 - 19466169	dehydrogenase, putative, expressed
LOC_Os09g32680	Ⅱ	Chr9: 19498959 - 19503133	cyclin, putative, expressed
LOC_Os09g32730	Ⅲ	Chr9: 19520185 - 19519240	zinc finger, C3HC4 type domain containing protein, expressed
LOC_Os09g32740	Ⅳ	Chr9: 19527787 - 19522112	ubiquitin carboxyl-terminal hydrolase family protein, expressed
LOC_Os09g32750	Ⅴ	Chr9: 19533020 - 19540880	FHA domain containing protein, putative, expressed
LOC_Os09g32760	Ⅵ	Chr9: 19545586 - 19541746	acyl-ACP thioesterase, putative, expressed
LOC_Os09g32810	Ⅶ	Chr9: 19566172 - 19568924	ribulose-phosphate 3-epimerase, putative, expressed
LOC_Os09g32820	Ⅷ	Chr9: 19570000 - 19575614	uridine/cytidine kinase-like 1, putative, expressed
LOC_Os09g32830	Ⅸ	Chr9: 19577361 - 19581005	nucleotide pyrophosphatase/phosphodiesterase, putative, expressed
LOC_Os09g32840	Ⅹ	Chr9: 19586210 - 19581485	nucleotide pyrophosphatase/phosphodiesterase, putative, expressed
LOC_Os09g32860	Ⅺ	Chr9: 19589542 - 19592781	OsFBX335 - F-box domain containing protein, expressed
LOC_Os09g32870	Ⅻ	Chr9: 19594270 - 19597668	OsFBX336 - F-box domain containing protein, expressed

## Sheet: Supplementary Table 4
Supplementary Table 4. All variations of Chalk9 in 149 indica accessions were identified by re-sequencing based on PCR amplification. v1 to v28 indicates the name of the variations. 0, no insertion. NA, not detected.
Variety	-1693bp	-1530bp	-1396bp	-1355bp	-1331bp	-1221bp	-1190bp	-1022bp	-962bp	-817bp	-805bp	-791bp	-789bp	-749bp	-634bp	-596bp	-524bp	-523bp	-500bp	-472bp	-179bp/ -191bp	-173bp	-143/-148bp	-128bp	-48bp	294bp	584bp	739bp
	v1	v2	v3	v4	v5	v6	v7	v8	v9	v10	v11	v12	v13	v14	v15	v16	v17	v18	v19	v20	v21	v22	v23	v24	v25	v26	v27	v28	CGR	DCG
Guichao2	T	G	T	G	0	C	A	0	T	A	G	T	0	G	G	G	A	G	T	A	0	A	0	C	T	G	G	T	76.4	27.37
Xieqingzao	T	G	T	G	0	C	A	0	T	A	G	T	0	G	G	G	A	G	T	A	0	A	0	C	T	G	G	T	64.11	29.8
Yangdao8	T	G	T	G	0	C	A	0	T	A	G	T	0	G	G	G	A	G	T	A	0	A	0	C	T	G	G	T	58.25	24.26
Longtefu	T	G	T	G	0	C	A	0	T	A	G	T	0	G	G	G	A	G	T	A	0	A	0	C	T	G	G	T	98.46	30.5
Yan91-3	T	G	T	G	0	C	A	0	T	A	G	T	0	G	G	G	A	G	T	A	0	A	0	C	T	G	G	T	46.56	12.63
Zhenzhuai	T	G	T	G	0	C	A	0	T	A	G	T	0	G	G	G	A	G	T	A	0	A	0	C	T	G	G	T	71.4	25.35
81-280	T	G	T	G	0	C	A	0	T	A	G	T	0	G	G	G	A	G	T	A	0	A	0	C	T	G	G	T	72.31	33.51
Chenduai3	T	G	T	G	0	C	A	0	T	A	G	T	0	G	G	G	A	G	T	A	0	A	0	C	T	G	G	T	98.62	31.7
Liusha1	T	G	T	G	0	C	A	0	T	A	G	T	0	G	G	G	A	G	T	A	0	A	0	C	T	G	G	T	89.94	41.11
Xianghui91269	T	G	T	G	0	C	A	0	T	A	G	T	0	G	G	G	A	G	T	A	0	A	0	C	T	G	G	T	89.07	45.6
Yangdao3	C	T	A	G	0	T	G	0	T	A	G	T	T	G	G	G	A	G	T	A	0	A	0	C	T	G	G	T	31.51	6.85
Xiangwanxian1	T	G	T	G	0	C	A	0	T	A	G	T	0	G	G	G	A	G	T	A	0	A	0	C	T	G	G	T	46.21	15.6
Fuwan23	T	G	T	G	0	C	A	0	T	A	G	T	0	G	G	G	A	G	T	A	0	A	0	C	T	G	G	T	50.58	12.81
Xiangzhou7	T	G	T	G	0	C	A	0	T	A	G	T	0	G	G	G	A	G	T	A	0	A	0	C	T	G	G	T	78.12	43.1
Wenguangqing	T	G	T	G	0	C	A	0	T	A	G	T	0	G	G	G	A	G	T	A	0	A	0	C	T	G	G	T	87.63	41.56
Jiuyunwan1	T	G	T	G	0	C	A	0	T	A	G	T	0	G	G	G	A	G	T	A	0	A	0	C	T	G	G	T	74.39	38.32
Zhaierdao	T	G	T	G	0	C	A	0	T	A	G	T	0	G	G	G	A	G	T	A	0	A	0	C	T	G	G	T	79.35	37.08
Xinqingai	T	G	T	G	0	C	A	0	T	A	G	T	0	G	G	G	A	G	T	A	0	A	0	C	T	G	G	T	74.21	31.53
Qingliuai1	T	G	T	G	0	C	A	0	T	A	G	T	0	G	G	G	A	G	T	A	0	A	0	C	T	G	G	T	62.2	20.98
Qisizao3	T	G	T	G	0	C	A	0	T	A	G	T	0	G	G	G	A	G	T	A	0	A	0	C	T	G	G	T	39.93	18.5
Zhuguang29	T	G	T	G	0	C	A	0	T	A	G	T	0	G	G	G	A	G	T	A	0	A	0	C	T	G	G	T	90.4	43.5
Mijifu	T	G	T	G	0	C	A	0	T	A	G	T	0	G	G	G	A	G	T	A	0	A	0	C	T	G	G	T	99.32	41.2
Yuegui146	T	G	T	G	0	C	A	0	T	A	G	T	0	G	G	G	A	G	T	A	0	A	0	C	T	G	G	T	50.5	10.91
Shuanggui1	T	G	T	G	0	C	A	0	T	A	G	T	0	G	G	G	A	G	T	A	0	A	0	C	T	G	G	T	85.33	43.2
Texianzhan13	T	G	T	G	0	C	A	0	T	A	G	T	0	G	G	G	A	G	T	A	0	A	0	C	T	G	G	T	43.13	13.1
Jiazao1	T	G	T	G	0	C	A	0	T	A	G	T	T	G	G	G	NA	G	T	A	0	A	NA	NA	T	G	G	T	55.45	16.78
Xiangzaoxian45	T	G	T	G	0	C	A	0	T	A	G	T	0	G	G	G	A	G	T	A	0	A	0	C	T	G	G	T	59.62	17.1
Liaohe12	T	G	T	G	0	C	NA	0	T	A	G	T	0	G	G	G	A	G	T	A	0	A	0	C	T	G	G	T	66.5	21.95
W385	T	G	T	G	0	C	A	0	T	A	G	T	0	G	G	G	A	G	T	A	0	A	0	C	T	G	G	T	63.14	23.5
W398	T	G	T	G	0	C	A	0	T	A	G	T	0	G	G	G	A	G	T	A	0	A	0	C	T	G	G	T	99.55	31.5
Cocodrie	T	G	T	G	0	C	A	0	T	A	G	T	0	G	G	G	A	G	T	A	0	A	0	C	T	G	G	T	99.63	32.8
Yiai1	T	G	T	G	0	C	A	0	T	A	G	T	0	G	G	G	A	G	T	A	0	A	0	C	T	G	G	T	82.4	30.8
Safut Khosha	T	G	T	G	0	C	A	0	T	A	G	T	0	G	G	G	A	G	T	A	0	A	0	C	T	G	G	T	77.86	36.16
4595	T	G	T	G	0	C	A	0	T	A	G	T	0	G	G	G	A	G	T	A	0	A	0	C	T	G	G	T	82.72	39.38
TAINUNG 45	T	G	T	G	0	C	A	0	T	A	G	T	0	G	G	G	A	G	T	A	0	A	0	C	T	G	G	T	98.26	32.44
Shuiyuan137	T	G	T	G	0	C	A	0	T	A	G	T	T	G	G	G	A	G	T	A	0	A	0	C	T	G	G	T	38.34	9.41
Meiguodao	T	G	T	G	0	C	A	0	T	A	G	T	T	G	G	G	A	G	T	A	0	A	0	C	T	G	G	T	89	38.8
WD-16370	T	G	T	G	0	C	A	0	T	A	G	T	0	G	G	G	A	G	T	A	0	A	0	C	T	G	G	T	48.03	13.18
WD-16372	T	G	T	G	0	C	A	0	T	A	G	T	0	G	G	G	A	G	T	A	0	A	0	C	T	G	G	T	39.11	9.92
WD-16376	T	G	T	G	0	C	A	0	T	A	G	T	0	G	G	G	A	G	T	A	0	A	0	C	T	G	G	T	50.6	14.36
Hongmisandan	T	G	T	G	0	C	A	0	T	A	G	T	0	G	G	G	A	G	T	A	0	A	0	C	T	G	G	T	94.14	33.9
Zhenxian232	T	G	T	G	0	C	A	0	T	A	G	T	0	G	G	G	A	G	T	A	0	A	0	C	T	G	G	T	61.1	22.8
JWR 221	T	G	T	G	0	C	A	0	T	A	G	T	0	G	G	G	A	G	T	A	0	A	0	C	T	G	G	T	45.19	10.53
XiangaiB	T	G	T	G	0	C	A	0	T	A	G	T	0	G	G	G	A	G	T	A	0	A	0	C	T	G	G	T	67.14	28.45
Baoxie-7B	T	G	T	G	0	C	A	0	T	A	G	T	0	G	G	G	A	G	T	A	0	A	0	C	T	G	G	T	36.69	16.35
Nanjing16	C	T	A	A	ATTATGCTTATAAGACAAAGCTTAAATTTTAAACTTAATTTTGAATTTTATTTTTAATCTTTTT	T	G	0	T	G	G	0	T	A	C	A	A	G	T	A	0	A	AACAC	G	T	C	G	T	13.82	3.16
IR64	C	T	A	A	ATTATGCTTATAAGACAAAGCTTAAATTTTAAACTTAATTTTGAATTTTATTTTTAATCTTTTT	C	A	0	T	G	G	0	T	A	C	A	A	G	T	A	0	A	AACAC	G	T	C	G	T	43.64	13.01
IR72	C	T	A	A	ATTATGCTTATAAGACAAAGCTTAAATTTTAAACTTAATTTTGAATTTTATTTTTAATCTTTTT	T	G	0	T	G	G	0	T	A	C	A	A	G	T	A	0	A	AACAC	G	T	C	G	T	6.17	1.26
Molixiangzhan	T	G	T	A	ATTATGCTTATAAGACAAAGCTTAAATTTTAAACTTAATTTTGAATTTTATTTTTAATCTTTTT	C	A	0	T	G	G	0	0	A	C	G	A	G	T	A	0	A	0	C	T	G	G	T	13.16	6.84
Yangfuxian2	C	T	A	A	ATTATGCTTATAAGACAAAGCTTAAATTTTAAACTTAATTTTGAATTTTATTTTTAATCTTTTT	T	G	0	T	G	G	0	T	A	C	A	A	G	T	A	0	A	AACAC	G	T	C	G	T	34.9	13.6
Wuxiangxian	C	T	A	A	ATTATGCTTATAAGACAAAGCTTAAATTTTAAACTTAATTTTGAATTTTATTTTTAATCTTTTT	T	G	0	T	G	G	0	T	A	C	A	A	G	T	A	0	A	AACAC	G	T	C	G	T	27.98	12.1
Qisiruanzhan	C	T	A	A	ATTATGCTTATAAGACAAAGCTTAAATTTTAAACTTAATTTTGAATTTTATTTTTAATCTTTTT	T	G	0	T	G	G	0	T	A	C	A	A	G	T	A	0	A	AACAC	G	T	C	G	T	19.57	14.68
Yangdao4	C	T	A	A	ATTATGCTTATAAGACAAAGCTTAAATTTTAAACTTAATTTTGAATTTTATTTTTAATCTTTTT	T	G	0	T	G	G	0	T	A	C	A	A	G	T	A	0	A	AACAC	G	T	C	G	T	44.62	16.99
3037	C	T	A	A	ATTATGCTTATAAGACAAAGCTTAAATTTTAAACTTAATTTTGAATTTTATTTTTAATCTTTTT	T	G	0	T	G	G	0	T	A	C	A	A	G	T	A	0	A	AACAC	G	T	C	G	T	6.31	7.2
Zhongxiang1	C	T	A	A	ATTATGCTTATAAGACAAAGCTTAAATTTTAAACTTAATTTTGAATTTTATTTTTAATCTTTTT	T	G	0	T	G	G	0	T	A	C	A	A	G	T	A	0	A	AACAC	G	T	C	G	T	11.56	6.3
Miyang46	C	T	A	A	ATTATGCTTATAAGACAAAGCTTAAATTTTAAACTTAATTTTGAATTTTATTTTTAATCTTTTT	T	G	0	T	G	G	0	T	A	C	A	A	G	T	A	0	A	AACAC	G	T	C	G	T	41.38	16.83
E32	C	T	A	A	ATTATGCTTATAAGACAAAGCTTAAATTTTAAACTTAATTTTGAATTTTATTTTTAATCTTTTT	T	G	0	T	G	G	0	T	A	C	A	A	G	T	A	0	A	AACAC	G	T	C	G	T	25.6	11.3
R6547	C	T	A	A	ATTATGCTTATAAGACAAAGCTTAAATTTTAAACTTAATTTTGAATTTTATTTTTAATCTTTTT	T	G	0	T	G	G	0	T	A	C	A	A	G	T	A	0	A	AACAC	G	T	C	G	T	66.77	22.1
R084	C	T	A	A	ATTATGCTTATAAGACAAAGCTTAAATTTTAAACTTAATTTTGAATTTTATTTTTAATCTTTTT	T	G	0	T	G	G	0	T	A	C	A	A	G	T	A	0	A	AACAC	G	T	C	G	T	50.14	15.8
Qimiaoxiang	C	T	A	A	ATTATGCTTATAAGACAAAGCTTAAATTTTAAACTTAATTTTGAATTTTATTTTTAATCTTTTT	T	G	0	T	G	G	0	T	A	C	A	A	G	T	A	0	A	AACAC	G	T	C	G	T	9.35	7.3
Ezhong4	C	T	A	A	ATTATGCTTATAAGACAAAGCTTAAATTTTAAACTTAATTTTGAATTTTATTTTTAATCTTTTT	T	G	0	T	G	G	0	T	A	C	A	A	G	T	A	0	A	AACAC	G	T	C	G	T	8.41	1.9
Miyang50	C	T	A	A	ATTATGCTTATAAGACAAAGCTTAAATTTTAAACTTAATTTTGAATTTTATTTTTAATCTTTTT	T	G	0	T	G	G	0	T	A	C	A	A	G	T	A	0	A	AACAC	G	T	C	G	T	24.52	7
Shuiyuan262	T	G	T	A	ATTATGCTTATAAGACAAAGCTTAAATTTTAAACTTAATTTTGAATTTTATTTTTAATCTTTTT	C	A	0	T	G	G	0	0	A	C	G	A	G	T	A	0	A	0	C	T	G	G	T	25.32	12.3
Yuexiangzhan	C	T	A	A	ATTATGCTTATAAGACAAAGCTTAAATTTTAAACTTAATTTTGAATTTTATTTTTAATCTTTTT	T	G	0	T	G	G	0	T	A	C	A	A	G	T	A	0	A	AACAC	G	T	C	G	T	31.79	9.4
Newrex	C	T	A	A	ATTATGCTTATAAGACAAAGCTTAAATTTTAAACTTAATTTTGAATTTTATTTTTAATCTTTTT	T	G	0	T	G	G	0	T	A	C	A	A	G	T	A	0	A	AACAC	G	T	C	G	T	33.25	19.26
Zhendao886	C	T	A	A	ATTATGCTTATAAGACAAAGCTTAAATTTTAAACTTAATTTTGAATTTTATTTTTAATCTTTTT	T	G	0	T	G	G	0	T	A	C	A	A	G	T	A	0	A	AACAC	G	T	C	G	T	35.79	28.75
V6	C	T	A	A	ATTATGCTTATAAGACAAAGCTTAAATTTTAAACTTAATTTTGAATTTTATTTTTAATCTTTTT	T	NA	0	T	G	G	0	T	A	C	A	A	G	T	A	0	A	AACAC	G	T	C	G	T	31.74	9.85
Eyi105	C	T	A	A	ATTATGCTTATAAGACAAAGCTTAAATTTTAAACTTAATTTTGAATTTTATTTTTAATCTTTTT	T	G	0	T	G	G	0	T	A	C	A	A	G	T	A	0	A	AACAC	G	T	C	G	T	34.07	17.84
SML242	C	T	A	A	ATTATGCTTATAAGACAAAGCTTAAATTTTAAACTTAATTTTGAATTTTATTTTTAATCTTTTT	T	G	0	T	G	G	0	T	A	C	A	A	G	T	A	0	A	AACAC	G	T	C	G	T	61.4	17.36
Jinfeng14	T	G	T	A	ATTATGCTTATAAGACAAAGCTTAAATTTTAAACTTAATTTTGAATTTTATTTTTAATCTTTTT	C	A	0	T	G	G	0	0	A	C	G	A	G	T	A	0	A	0	C	T	G	G	T	35.55	6.66
Chengnongshuijing	T	T	A	A	ATTATGCTTATAAGACAAAGCTTAAATTTTAAACTTAATTTTGAATTTTATTTTTAATCTTTTT	T	G	0	T	G	G	0	T	A	C	A	A	G	T	A	0	A	AACAC	G	T	C	G	T	35.69	13.5
Huangsiguizhan	C	T	A	A	ATTATGCTTATAAGACAAAGCTTAAATTTTAAACTTAATTTTGAATTTTATTTTTAATCTTTTT	T	G	0	T	G	G	0	T	A	C	G	A	G	T	A	0	A	AACAC	G	T	C	G	T	27.05	17.5
Gui630	C	T	A	A	ATTATGCTTATAAGACAAAGCTTAAATTTTAAACTTAATTTTGAATTTTATTTTTAATCTTTTT	T	G	0	T	G	G	0	T	A	C	A	A	G	T	A	0	A	AACAC	G	T	C	G	T	60.8	32.5
Gangzaoxian33	C	T	A	A	ATTATGCTTATAAGACAAAGCTTAAATTTTAAACTTAATTTTGAATTTTATTTTTAATCTTTTT	T	G	0	T	G	G	0	T	A	C	A	A	G	T	A	0	A	AACAC	G	T	C	G	T	60.67	15.39
Xiangzaoxian12	C	T	A	A	ATTATGCTTATAAGACAAAGCTTAAATTTTAAACTTAATTTTGAATTTTATTTTTAATCTTTTT	T	G	0	T	G	G	0	T	A	C	A	A	G	T	A	0	A	AACAC	G	T	C	G	T	28.13	11.12
Gangwanxian19	C	T	NA	A	ATTATGCTTATAAGACAAAGCTTAAATTTTAAACTTAATTTTGAATTTTATTTTTAATCTTTTT	T	G	0	T	G	G	0	T	A	C	A	A	G	T	A	0	A	AACAC	G	T	C	G	T	11.82	6.8
Dangyu3	C	T	A	A	ATTATGCTTATAAGACAAAGCTTAAATTTTAAACTTAATTTTGAATTTTATTTTTAATCTTTTT	T	G	0	T	G	G	0	T	A	C	A	A	G	T	A	0	A	AACAC	G	T	C	G	T	21.09	5.5
Zhengui9	C	T	A	A	ATTATGCTTATAAGACAAAGCTTAAATTTTAAACTTAATTTTGAATTTTATTTTTAATCTTTTT	T	G	0	T	G	G	0	T	A	C	A	A	G	T	A	0	A	AACAC	G	T	C	G	T	56.9	16.21
Raowan6	C	T	A	A	ATTATGCTTATAAGACAAAGCTTAAATTTTAAACTTAATTTTGAATTTTATTTTTAATCTTTTT	T	G	0	T	G	G	0	T	A	C	A	A	G	T	A	0	A	AACAC	G	T	C	G	T	52.61	23.6
Luowanxian2	C	T	A	A	ATTATGCTTATAAGACAAAGCTTAAATTTTAAACTTAATTTTGAATTTTATTTTTAATCTTTTT	T	G	0	T	G	G	0	T	A	C	A	A	G	T	A	0	A	AACAC	G	T	C	G	T	47.27	18.14
Shaner59	C	T	A	A	ATTATGCTTATAAGACAAAGCTTAAATTTTAAACTTAATTTTGAATTTTATTTTTAATCTTTTT	T	G	0	T	G	G	0	T	A	C	A	A	G	T	A	0	A	AACAC	G	T	C	G	T	39.47	11.6
Wannuo53	T	G	T	A	ATTATGCTTATAAGACAAAGCTTAAATTTTAAACTTAATTTTGAATTTTATTTTTAATCTTTTT	C	A	0	T	G	G	0	0	A	C	G	A	G	T	A	0	A	0	C	T	G	G	T	13.31	3.04
Xiangsimiao2	T	G	T	A	ATTATGCTTATAAGACAAAGCTTAAATTTTAAACTTAATTTTGAATTTTATTTTTAATCTTTTT	C	A	0	T	G	G	0	0	A	C	G	A	G	T	A	0	A	0	C	T	G	G	T	22.83	12.3
Qixiuzhan3	C	T	A	A	ATTATGCTTATAAGACAAAGCTTAAATTTTAAACTTAATTTTGAATTTTATTTTTAATCTTTTT	T	G	0	T	G	G	0	T	A	C	A	A	G	T	A	0	A	AACAC	G	T	C	G	T	51.75	17.38
Chansizhan	C	T	A	A	ATTATGCTTATAAGACAAAGCTTAAATTTTAAACTTAATTTTGAATTTTATTTTTAATCTTTTT	T	G	0	T	G	G	0	T	A	C	A	A	G	T	A	0	A	AACAC	G	T	C	G	T	27.82	13.87
Yuexinzhan5	C	T	A	A	ATTATGCTTATAAGACAAAGCTTAAATTTTAAACTTAATTTTGAATTTTATTTTTAATCTTTTT	T	G	0	T	G	G	0	T	A	C	A	A	G	T	A	0	A	AACAC	G	T	C	G	T	66.76	24.4
Xingfengzhan2	C	T	A	A	ATTATGCTTATAAGACAAAGCTTAAATTTTAAACTTAATTTTGAATTTTATTTTTAATCTTTTT	T	G	0	T	G	G	0	T	A	C	A	A	G	T	A	0	A	AACAC	G	T	C	G	T	26.47	11.8
Mabaojin	C	T	A	A	ATTATGCTTATAAGACAAAGCTTAAATTTTAAACTTAATTTTGAATTTTATTTTTAATCTTTTT	T	G	0	T	G	G	0	T	A	C	A	A	G	T	A	0	A	AACAC	G	T	C	G	T	47.87	24.8
Nongdu4	NA	NA	NA	A	ATTATGCTTATAAGACAAAGCTTAAATTTTAAACTTAATTTTGAATTTTATTTTTAATCTTTTT	C	A	0	T	G	G	0	0	A	C	G	A	G	T	A	0	A	0	C	T	G	G	T	55.81	18.27
Laian19	C	T	A	A	ATTATGCTTATAAGACAAAGCTTAAATTTTAAACTTAATTTTGAATTTTATTTTTAATCTTTTT	T	G	0	T	G	G	0	T	A	C	A	A	G	T	A	0	A	AACAC	G	T	NA	G	T	65.8	23.51
Zhongyu1	C	T	A	A	ATTATGCTTATAAGACAAAGCTTAAATTTTAAACTTAATTTTGAATTTTATTTTTAATCTTTTT	T	G	0	T	G	G	0	T	A	C	A	A	G	T	A	0	A	AACAC	G	T	C	G	T	56.8	20.1
Aoqingzhan	C	T	A	A	ATTATGCTTATAAGACAAAGCTTAAATTTTAAACTTAATTTTGAATTTTATTTTTAATCTTTTT	T	G	0	T	G	G	0	T	A	C	A	A	G	T	A	0	A	AACAC	G	T	C	G	T	26.38	5.88
Shengyou2	C	T	A	A	ATTATGCTTATAAGACAAAGCTTAAATTTTAAACTTAATTTTGAATTTTATTTTTAATCTTTTT	T	G	0	T	G	G	0	T	A	C	A	A	G	T	A	0	A	AACAC	G	T	C	G	T	37.02	10.47
Huaxianzhan	C	T	A	A	ATTATGCTTATAAGACAAAGCTTAAATTTTAAACTTAATTTTGAATTTTATTTTTAATCTTTTT	T	G	0	T	G	G	0	T	A	C	A	A	G	T	A	0	A	AACAC	G	T	C	G	T	32.51	17.14
Jiahezaozhan	C	T	A	A	ATTATGCTTATAAGACAAAGCTTAAATTTTAAACTTAATTTTGAATTTTATTTTTAATCTTTTT	T	G	0	T	G	G	0	T	A	C	A	A	G	T	A	0	A	AACAC	G	T	C	G	T	57.31	26.1
Mancang515	C	T	A	A	ATTATGCTTATAAGACAAAGCTTAAATTTTAAACTTAATTTTGAATTTTATTTTTAATCTTTTT	T	G	0	T	G	G	0	T	A	C	A	A	G	T	A	0	A	AACAC	G	T	C	G	T	56.94	24.5
Lvhuangzhan	C	T	A	A	ATTATGCTTATAAGACAAAGCTTAAATTTTAAACTTAATTTTGAATTTTATTTTTAATCTTTTT	T	G	0	T	G	G	0	T	A	C	A	A	G	T	A	0	A	AACAC	G	T	C	G	T	27.76	13.5
Xiangzaoxian22	C	T	A	A	ATTATGCTTATAAGACAAAGCTTAAATTTTAAACTTAATTTTGAATTTTATTTTTAATCTTTTT	T	G	0	T	G	G	0	T	A	C	A	A	G	T	A	0	A	AACAC	G	T	C	G	T	35.47	12.01
Dongnong424	C	T	A	A	ATTATGCTTATAAGACAAAGCTTAAATTTTAAACTTAATTTTGAATTTTATTTTTAATCTTTTT	T	G	0	T	G	G	0	T	A	C	A	A	G	T	A	0	A	AACAC	G	T	C	G	T	22.69	10.42
Bakiella 1	C	T	A	A	ATTATGCTTATAAGACAAAGCTTAAATTTTAAACTTAATTTTGAATTTTATTTTTAATCTTTTT	T	G	0	T	G	G	0	T	A	C	A	A	G	T	A	0	A	AACAC	G	T	C	G	T	39.58	20.18
Jumli dhan	C	T	A	A	ATTATGCTTATAAGACAAAGCTTAAATTTTAAACTTAATTTTGAATTTTATTTTTAATCTTTTT	T	G	0	T	G	G	0	T	A	C	A	A	G	T	A	0	A	AACAC	G	T	C	G	T	45.45	12.22
CNTLR80076-44-1-1-1	T	T	A	A	ATTATGCTTATAAGACAAAGCTTAAATTTTAAACTTAATTTTGAATTTTATTTTTAATCTTTTT	T	G	0	T	G	G	0	T	A	C	A	A	G	T	A	0	A	0	C	T	C	G	T	20.18	11.8
IR 58614-B-B-8-2	C	T	A	A	ATTATGCTTATAAGACAAAGCTTAAATTTTAAACTTAATTTTGAATTTTATTTTTAATCTTTTT	T	G	0	T	G	G	0	T	A	C	A	A	G	T	A	0	A	AACAC	G	T	C	G	T	40.93	16.52
4484	C	T	A	A	ATTATGCTTATAAGACAAAGCTTAAATTTTAAACTTAATTTTGAATTTTATTTTTAATCTTTTT	T	G	0	T	G	G	0	T	A	C	A	A	G	T	A	0	A	AACAC	G	T	C	G	T	45.11	19.45
EMBRAPA 1200	C	T	A	A	ATTATGCTTATAAGACAAAGCTTAAATTTTAAACTTAATTTTGAATTTTATTTTTAATCTTTTT	T	G	0	T	G	G	0	T	A	C	A	A	G	T	A	0	A	AACAC	G	T	C	G	T	32.45	6.33
Shimla Early	C	T	A	A	ATTATGCTTATAAGACAAAGCTTAAATTTTAAACTTAATTTTGAATTTTATTTTTAATCTTTTT	T	G	0	T	G	G	0	T	A	C	A	A	G	T	A	0	A	AACAC	G	T	C	G	T	28.8	4.66
Tranoeup Beykher	C	T	A	A	ATTATGCTTATAAGACAAAGCTTAAATTTTAAACTTAATTTTGAATTTTATTTTTAATCTTTTT	T	G	0	T	G	G	0	T	A	C	A	A	G	T	A	0	A	AACAC	G	T	C	G	T	56.32	15.97
Chin Chin	C	T	A	A	ATTATGCTTATAAGACAAAGCTTAAATTTTAAACTTAATTTTGAATTTTATTTTTAATCTTTTT	T	G	0	T	G	G	0	T	A	C	A	A	G	T	A	0	A	AACAC	G	T	C	G	T	15.46	5.6
RP2151-173-1-8	C	T	A	A	ATTATGCTTATAAGACAAAGCTTAAATTTTAAACTTAATTTTGAATTTTATTTTTAATCTTTTT	T	G	0	T	G	G	0	T	A	C	A	A	G	T	A	0	A	AACAC	G	T	C	G	T	48.41	13.19
HB-6-2	C	T	A	A	ATTATGCTTATAAGACAAAGCTTAAATTTTAAACTTAATTTTGAATTTTATTTTTAATCTTTTT	T	G	0	T	G	G	0	T	A	C	A	A	G	T	A	0	A	AACAC	G	T	C	G	T	41.15	16.45
ECIA76-S89-1	C	T	A	A	ATTATGCTTATAAGACAAAGCTTAAATTTTAAACTTAATTTTGAATTTTATTTTTAATCTTTTT	T	G	0	T	G	G	0	T	A	C	A	A	G	T	A	0	A	AACAC	G	T	C	G	T	26.2	12.5
Huangkedao	C	T	A	A	ATTATGCTTATAAGACAAAGCTTAAATTTTAAACTTAATTTTGAATTTTATTTTTAATCTTTTT	T	G	0	T	G	G	0	T	A	C	A	A	G	T	A	0	A	AACAC	G	T	C	G	T	31.91	25.36
BuleidaA-75	T	G	T	A	ATTATGCTTATAAGACAAAGCTTAAATTTTAAACTTAATTTTGAATTTTATTTTTAATCTTTTT	C	A	0	T	G	G	0	T	A	C	A	A	G	T	A	0	A	AACAC	G	T	C	G	T	34.02	25.6
WD-16376	C	T	A	A	ATTATGCTTATAAGACAAAGCTTAAATTTTAAACTTAATTTTGAATTTTATTTTTAATCTTTTT	T	G	0	T	G	G	0	T	A	C	A	A	G	T	A	0	A	AACAC	G	T	C	G	T	38.58	10.07
Zhenfu8	T	G	T	A	ATTATGCTTATAAGACAAAGCTTAAATTTTAAACTTAATTTTGAATTTTATTTTTAATCTTTTT	C	A	0	T	G	G	0	0	A	C	G	A	G	T	A	0	A	0	C	T	C	G	T	10.69	11.9
WD-17403	C	T	A	A	ATTATGCTTATAAGACAAAGCTTAAATTTTAAACTTAATTTTGAATTTTATTTTTAATCTTTTT	T	G	0	T	G	G	0	T	A	C	A	A	G	T	A	0	A	AACAC	G	T	C	G	T	40.36	13.5
WD-17862	C	T	A	A	ATTATGCTTATAAGACAAAGCTTAAATTTTAAACTTAATTTTGAATTTTATTTTTAATCTTTTT	T	G	0	T	G	G	0	T	A	C	A	A	G	T	A	0	A	AACAC	G	T	C	G	T	14.89	1.83
WD-18366	C	T	A	A	ATTATGCTTATAAGACAAAGCTTAAATTTTAAACTTAATTTTGAATTTTATTTTTAATCTTTTT	T	G	0	T	G	G	0	T	A	C	A	A	G	T	A	0	A	AACAC	G	T	C	G	T	15.49	6.1
WD-18495	C	T	A	A	ATTATGCTTATAAGACAAAGCTTAAATTTTAAACTTAATTTTGAATTTTATTTTTAATCTTTTT	T	G	0	T	G	G	0	T	A	C	A	A	G	T	A	0	A	AACAC	G	T	C	G	T	2.01	0.43
WD-18547	C	T	A	A	ATTATGCTTATAAGACAAAGCTTAAATTTTAAACTTAATTTTGAATTTTATTTTTAATCTTTTT	T	G	0	T	G	G	0	T	A	C	A	A	G	T	A	0	A	AACAC	G	T	C	G	T	3.7	0.8
Dongtingwanxian	T	G	T	A	ATTATGCTTATAAGACAAAGCTTAAATTTTAAACTTAATTTTGAATTTTATTTTTAATCTTTTT	C	A	0	T	G	G	0	0	A	C	A	A	G	T	A	0	A	AACAC	G	T	C	G	T	43.67	23.85
Xibainian	T	G	T	A	ATTATGCTTATAAGACAAAGCTTAAATTTTAAACTTAATTTTGAATTTTATTTTTAATCTTTTT	C	A	0	T	G	G	0	0	A	C	A	A	G	T	A	0	A	AACAC	G	T	C	G	T	26.8	10.78
Gu154	C	T	A	A	ATTATGCTTATAAGACAAAGCTTAAATTTTAAACTTAATTTTGAATTTTATTTTTAATCTTTTT	T	G	0	T	G	G	0	T	A	C	A	A	G	T	A	0	A	AACAC	G	T	C	G	T	29.56	10.8
IR 661-1	C	T	A	A	ATTATGCTTATAAGACAAAGCTTAAATTTTAAACTTAATTTTGAATTTTATTTTTAATCTTTTT	C	A	0	T	G	G	0	0	A	C	G	A	G	T	A	0	A	0	C	T	G	G	T	21.54	3.58
Lengshuinou	T	G	T	A	ATTATGCTTATAAGACAAAGCTTAAATTTTAAACTTAATTTTGAATTTTATTTTTAATCTTTTT	T	G	0	T	G	G	0	T	A	C	A	A	G	T	A	0	A	AACAC	G	T	C	G	T	22.47	10.9
Bolvguangnian	C	T	A	A	ATTATGCTTATAAGACAAAGCTTAAATTTTAAACTTAATTTTGAATTTTATTTTTAATCTTTTT	C	A	0	T	G	G	0	T	A	C	G	A	G	T	A	0	A	AACAC	G	T	C	G	T	29.96	18.45
Jinnante43B	C	T	A	A	ATTATGCTTATAAGACAAAGCTTAAATTTTAAACTTAATTTTGAATTTTATTTTTAATCTTTTT	T	G	0	T	G	G	0	T	A	C	A	A	G	T	A	0	A	AACAC	G	T	C	G	T	64.14	26.2
Shaxuan10	T	G	T	A	ATTATGCTTATAAGACAAAGCTTAAATTTTAAACTTAATTTTGAATTTTATTTTTAATCTTTTT	C	A	GATG	A	G	A	0	0	A	C	G	G	A	A	0	TTCTTCTTCTTC	T	0	C	C	G	A	C	17	3.7
WD-18424	C	T	A	A	ATTATGCTTATAAGACAAAGCTTAAATTTTAAACTTAATTTTGAATTTTATTTTTAATCTTTTT	C	A	GATG	A	G	A	0	0	A	C	G	G	A	A	0	TTCTTCTTCTTC	T	0	C	C	G	A	C	22.01	4.87
WD-15786	T	G	T	A	ATTATGCTTATAAGACAAAGCTTAAATTTTAAACTTAATTTTGAATTTTATTTTTAATCTTTTT	C	A	GATG	A	G	A	0	0	A	C	G	G	A	A	0	TTCTTCTTCTTC	T	0	C	C	G	A	C	28.04	5.21
Songgeng9	NA	G	T	A	ATTATGCTTATAAGACAAAGCTTAAATTTTAAACTTAATTTTGAATTTTATTTTTAATCTTTTT	C	A	GATG	A	G	A	0	0	A	C	G	G	A	A	0	TTCTTCTTCTTC	T	0	C	C	G	A	C	34.75	7.84
WD-17685	T	G	T	A	ATTATGCTTATAAGACAAAGCTTAAATTTTAAACTTAATTTTGAATTTTATTTTTAATCTTTTT	C	A	GATG	A	G	A	0	0	A	C	G	G	A	A	0	TTCTTCTTCTTC	T	0	C	C	G	A	C	43.54	18.58
Xinlonggeng3	T	G	T	A	ATTATGCTTATAAGACAAAGCTTAAATTTTAAACTTAATTTTGAATTTTATTTTTAATCTTTTT	C	A	GATG	A	G	A	0	0	A	C	G	G	A	A	0	TTCTTCTTCTTC	T	0	C	C	G	A	C	62.59	17.9
WD-15146	T	G	T	A	ATTATGCTTATAAGACAAAGCTTAAATTTTAAACTTAATTTTGAATTTTATTTTTAATCTTTTT	C	A	GATG	A	G	A	0	0	A	C	G	G	A	A	0	TTCTTCTTCTTC	T	0	C	C	G	A	C	62.71	24.725
Zaoshunonghu6	T	G	T	A	ATTATGCTTATAAGACAAAGCTTAAATTTTAAACTTAATTTTGAATTTTATTTTTAATCTTTTT	C	A	GATG	A	G	A	0	T	A	C	G	G	A	A	0	TTCTTCTTCTTC	T	AACAC	G	C	NA	A	C	78.65	19.76
Lunhui422	C	T	A	A	ATTATGCTTATAAGACAAAGCTTAAATTTTAAACTTAATTTTGAATTTTATTTTTAATCTTTTT	T	G	GATG	A	G	A	0	0	A	C	G	G	A	A	0	TTCTTCTTCTTC	T	0	C	C	G	A	C	80.85	22.8
A 152	T	G	T	A	ATTATGCTTATAAGACAAAGCTTAAATTTTAAACTTAATTTTGAATTTTATTTTTAATCTTTTT	C	A	GATG	A	G	G	0	0	G	C	G	G	A	A	0	TTCTTCTTCTTC	T	0	C	C	C	A	C	64.52	16.8
WD-18141	T	G	T	A	ATTATGCTTATAAGACAAAGCTTAAATTTTAAACTTAATTTTGAATTTTATTTTTAATCTTTTT	C	A	GATG	A	G	G	0	0	G	C	G	G	A	A	0	TTCTTCTTCTTC	T	0	C	C	G	A	C	41.06	11.48
Red Khosha Cerma	C	T	A	A	ATTATGCTTATAAGACAAAGCTTAAATTTTAAACTTAATTTTGAATTTTATTTTTAATCTTTTT	T	G	0	T	G	G	0	T	A	C	A	A	G	T	A	0	A	AACAC	G	C	G	G	T	38.71	19.5
Lua Chua Chan	C	T	A	A	ATTATGCTTATAAGACAAAGCTTAAATTTTAAACTTAATTTTGAATTTTATTTTTAATCTTTTT	T	G	0	T	G	G	0	T	A	C	A	A	G	T	A	0	A	AACAC	G	C	G	G	T	32.09	8.34
9311	C	T	A	A	ATTATGCTTATAAGACAAAGCTTAAATTTTAAACTTAATTTTGAATTTTATTTTTAATCTTTTT	T	G	0	T	G	G	0	T	A	C	A	A	G	T	A	0	A	AACAC	G	C	G	G	T	32.375	9.125
ARC 10633	T	G	T	A	ATTATGCTTATAAGACAAAGCTTAAATTTTAAACTTAATTTTGAATTTTATTTTTAATCTTTTT	T	G	0	T	G	G	0	T	A	C	A	A	G	T	A	0	A	AACAC	G	C	G	G	T	43.6	8.67
Changzao105	C	T	A	A	ATTATGCTTATAAGACAAAGCTTAAATTTTAAACTTAATTTTGAATTTTATTTTTAATCTTTTT	T	G	0	T	G	G	0	T	A	C	G	A	G	T	A	0	A	NA	NA	C	NA	A	T	48	13.57
IR 9660-48-1-1-2	T	G	T	A	ATTATGCTTATAAGACAAAGCTTAAATTTTAAACTTAATTTTGAATTTTATTTTTAATCTTTTT	C	A	0	T	G	G	0	0	A	C	G	A	G	T	A	0	A	AACAC	G	C	G	A	T	19.21	3.45
WD-16161	C	T	A	A	ATTATGCTTATAAGACAAAGCTTAAATTTTAAACTTAATTTTGAATTTTATTTTTAATCTTTTT	T	G	0	T	G	G	0	T	A	C	A	A	G	T	A	0	A	0	C	C	C	A	T	16.8	4.08
Taizhong65	T	G	T	A	ATTATGCTTATAAGACAAAGCTTAAATTTTAAACTTAATTTTGAATTTTATTTTTAATCTTTTT	C	A	0	T	G	G	0	0	A	C	G	A	G	T	A	0	A	AACAC	G	C	G	A	T	47.7	10.26
Habataki	C	T	A	A	ATTATGCTTATAAGACAAAGCTTAAATTTTAAACTTAATTTTGAATTTTATTTTTAATCTTTTT	C	A	0	T	G	G	0	0	A	C	G	A	G	T	A	0	A	NA	NA	T	NA	G	T	50.26	17.93
Sanjiang1	C	T	A	A	ATTATGCTTATAAGACAAAGCTTAAATTTTAAACTTAATTTTGAATTTTATTTTTAATCTTTTT	T	G	0	T	G	G	0	T	A	C	A	A	G	T	A	0	A	AACAC	G	T	G	G	T	18.15	3.42
WD-17556	C	T	A	A	ATTATGCTTATAAGACAAAGCTTAAATTTTAAACTTAATTTTGAATTTTATTTTTAATCTTTTT	T	G	0	T	G	G	0	T	A	C	A	A	G	T	A	0	A	AACAC	G	T	G	G	T	15.52	2.92
P value	1.11098e-09	2.25118e-10	3.78146e-10	5.471E-19	5.471E-19	1.35544e-09	2.73779e-09	0.6618	0.6618	5.471E-19	0.7823	5.471E-19	2.03242e-09	4.718E-19	5.471E-19	1.6978e-10	0.6618	0.6618	0.6618	0.6618	0.6618	0.6618	9.30053e-10	9.30053e-10	0.6624	1.91823e-09	0.8468	0.6618

## Sheet: Supplementary Table 5
Supplementary Table 5. Major haplotypes of Chalk9 were identified from significant variations in indica accessions. v4, v5, v10, v12, v14, and v15 indicate the significant variants.
Variety	-1355bp	-1331bp	-817bp	-791bp	-749bp	-634bp
	v4	v5	v10	v12	v14	v15
Guichao2	G	0	A	T	G	G	haplotype-H	indca
Xieqingzao	G	0	A	T	G	G	haplotype-H	indca
Yangdao8	G	0	A	T	G	G	haplotype-H	indca
Longtefu	G	0	A	T	G	G	haplotype-H	indca
Yan91-3	G	0	A	T	G	G	haplotype-H	indca
Zhenzhuai	G	0	A	T	G	G	haplotype-H	indca
81-280	G	0	A	T	G	G	haplotype-H	indca
Chenduai3	G	0	A	T	G	G	haplotype-H	indca
Liusha1	G	0	A	T	G	G	haplotype-H	indca
Xianghui91269	G	0	A	T	G	G	haplotype-H	indca
Yangdao3	G	0	A	T	G	G	haplotype-H	indca
Xiangwanxian1	G	0	A	T	G	G	haplotype-H	indca
Fuwan23	G	0	A	T	G	G	haplotype-H	indca
Xiangzhou7	G	0	A	T	G	G	haplotype-H	indca
Wenguangqing	G	0	A	T	G	G	haplotype-H	indca
Jiuyunwan1	G	0	A	T	G	G	haplotype-H	indca
Zhaierdao	G	0	A	T	G	G	haplotype-H	indca
Xinqingai	G	0	A	T	G	G	haplotype-H	indca
Qingliuai1	G	0	A	T	G	G	haplotype-H	indca
Qisizao3	G	0	A	T	G	G	haplotype-H	indca
Zhuguang29	G	0	A	T	G	G	haplotype-H	indca
Mijifu	G	0	A	T	G	G	haplotype-H	indca
Yuegui146	G	0	A	T	G	G	haplotype-H	indca
Shuanggui1	G	0	A	T	G	G	haplotype-H	indca
Texianzhan13	G	0	A	T	G	G	haplotype-H	indca
Jiazao1	G	0	A	T	G	G	haplotype-H	indca
Xiangzaoxian45	G	0	A	T	G	G	haplotype-H	indca
Liaohe12	G	0	A	T	G	G	haplotype-H	indca
W385	G	0	A	T	G	G	haplotype-H	indca
W398	G	0	A	T	G	G	haplotype-H	indca
Cocodrie	G	0	A	T	G	G	haplotype-H	indca
Yiai1	G	0	A	T	G	G	haplotype-H	indca
Safut Khosha	G	0	A	T	G	G	haplotype-H	indca
4595	G	0	A	T	G	G	haplotype-H	indca
TAINUNG 45	G	0	A	T	G	G	haplotype-H	indca
Shuiyuan137	G	0	A	T	G	G	haplotype-H	indca
Meiguodao	G	0	A	T	G	G	haplotype-H	indca
WD-16370	G	0	A	T	G	G	haplotype-H	indca
WD-16372	G	0	A	T	G	G	haplotype-H	indca
WD-16376	G	0	A	T	G	G	haplotype-H	indca
Hongmisandan	G	0	A	T	G	G	haplotype-H	indca
Zhenxian232	G	0	A	T	G	G	haplotype-H	indca
JWR 221	G	0	A	T	G	G	haplotype-H	indca
XiangaiB	G	0	A	T	G	G	haplotype-H	indca
Baoxie-7B	G	0	A	T	G	G	haplotype-H	indca
Nanjing16	A	ATTATGCTTATAAGACAAAGCTTAAATTTTAAACTTAATTTTGAATTTTATTTTTAATCTTTTT	G	0	A	C	haplotype-L	indca
IR64	A	ATTATGCTTATAAGACAAAGCTTAAATTTTAAACTTAATTTTGAATTTTATTTTTAATCTTTTT	G	0	A	C	haplotype-L	indca
IR72	A	ATTATGCTTATAAGACAAAGCTTAAATTTTAAACTTAATTTTGAATTTTATTTTTAATCTTTTT	G	0	A	C	haplotype-L	indca
Molixiangzhan	A	ATTATGCTTATAAGACAAAGCTTAAATTTTAAACTTAATTTTGAATTTTATTTTTAATCTTTTT	G	0	A	C	haplotype-L	indca
Yangfuxian2	A	ATTATGCTTATAAGACAAAGCTTAAATTTTAAACTTAATTTTGAATTTTATTTTTAATCTTTTT	G	0	A	C	haplotype-L	indca
Wuxiangxian	A	ATTATGCTTATAAGACAAAGCTTAAATTTTAAACTTAATTTTGAATTTTATTTTTAATCTTTTT	G	0	A	C	haplotype-L	indca
Qisiruanzhan	A	ATTATGCTTATAAGACAAAGCTTAAATTTTAAACTTAATTTTGAATTTTATTTTTAATCTTTTT	G	0	A	C	haplotype-L	indca
Yangdao4	A	ATTATGCTTATAAGACAAAGCTTAAATTTTAAACTTAATTTTGAATTTTATTTTTAATCTTTTT	G	0	A	C	haplotype-L	indca
3037	A	ATTATGCTTATAAGACAAAGCTTAAATTTTAAACTTAATTTTGAATTTTATTTTTAATCTTTTT	G	0	A	C	haplotype-L	indca
Zhongxiang1	A	ATTATGCTTATAAGACAAAGCTTAAATTTTAAACTTAATTTTGAATTTTATTTTTAATCTTTTT	G	0	A	C	haplotype-L	indca
Miyang46	A	ATTATGCTTATAAGACAAAGCTTAAATTTTAAACTTAATTTTGAATTTTATTTTTAATCTTTTT	G	0	A	C	haplotype-L	indca
E32	A	ATTATGCTTATAAGACAAAGCTTAAATTTTAAACTTAATTTTGAATTTTATTTTTAATCTTTTT	G	0	A	C	haplotype-L	indca
R6547	A	ATTATGCTTATAAGACAAAGCTTAAATTTTAAACTTAATTTTGAATTTTATTTTTAATCTTTTT	G	0	A	C	haplotype-L	indca
R084	A	ATTATGCTTATAAGACAAAGCTTAAATTTTAAACTTAATTTTGAATTTTATTTTTAATCTTTTT	G	0	A	C	haplotype-L	indca
Qimiaoxiang	A	ATTATGCTTATAAGACAAAGCTTAAATTTTAAACTTAATTTTGAATTTTATTTTTAATCTTTTT	G	0	A	C	haplotype-L	indca
Ezhong4	A	ATTATGCTTATAAGACAAAGCTTAAATTTTAAACTTAATTTTGAATTTTATTTTTAATCTTTTT	G	0	A	C	haplotype-L	indca
Miyang50	A	ATTATGCTTATAAGACAAAGCTTAAATTTTAAACTTAATTTTGAATTTTATTTTTAATCTTTTT	G	0	A	C	haplotype-L	indca
Shuiyuan262	A	ATTATGCTTATAAGACAAAGCTTAAATTTTAAACTTAATTTTGAATTTTATTTTTAATCTTTTT	G	0	A	C	haplotype-L	indca
Yuexiangzhan	A	ATTATGCTTATAAGACAAAGCTTAAATTTTAAACTTAATTTTGAATTTTATTTTTAATCTTTTT	G	0	A	C	haplotype-L	indca
Newrex	A	ATTATGCTTATAAGACAAAGCTTAAATTTTAAACTTAATTTTGAATTTTATTTTTAATCTTTTT	G	0	A	C	haplotype-L	indca
Zhendao886	A	ATTATGCTTATAAGACAAAGCTTAAATTTTAAACTTAATTTTGAATTTTATTTTTAATCTTTTT	G	0	A	C	haplotype-L	indca
V6	A	ATTATGCTTATAAGACAAAGCTTAAATTTTAAACTTAATTTTGAATTTTATTTTTAATCTTTTT	G	0	A	C	haplotype-L	indca
Eyi105	A	ATTATGCTTATAAGACAAAGCTTAAATTTTAAACTTAATTTTGAATTTTATTTTTAATCTTTTT	G	0	A	C	haplotype-L	indca
SML242	A	ATTATGCTTATAAGACAAAGCTTAAATTTTAAACTTAATTTTGAATTTTATTTTTAATCTTTTT	G	0	A	C	haplotype-L	indca
Jinfeng14	A	ATTATGCTTATAAGACAAAGCTTAAATTTTAAACTTAATTTTGAATTTTATTTTTAATCTTTTT	G	0	A	C	haplotype-L	indca
Chengnongshuijing	A	ATTATGCTTATAAGACAAAGCTTAAATTTTAAACTTAATTTTGAATTTTATTTTTAATCTTTTT	G	0	A	C	haplotype-L	indca
Huangsiguizhan	A	ATTATGCTTATAAGACAAAGCTTAAATTTTAAACTTAATTTTGAATTTTATTTTTAATCTTTTT	G	0	A	C	haplotype-L	indca
Gui630	A	ATTATGCTTATAAGACAAAGCTTAAATTTTAAACTTAATTTTGAATTTTATTTTTAATCTTTTT	G	0	A	C	haplotype-L	indca
Gangzaoxian33	A	ATTATGCTTATAAGACAAAGCTTAAATTTTAAACTTAATTTTGAATTTTATTTTTAATCTTTTT	G	0	A	C	haplotype-L	indca
Xiangzaoxian12	A	ATTATGCTTATAAGACAAAGCTTAAATTTTAAACTTAATTTTGAATTTTATTTTTAATCTTTTT	G	0	A	C	haplotype-L	indca
Gangwanxian19	A	ATTATGCTTATAAGACAAAGCTTAAATTTTAAACTTAATTTTGAATTTTATTTTTAATCTTTTT	G	0	A	C	haplotype-L	indca
Dangyu3	A	ATTATGCTTATAAGACAAAGCTTAAATTTTAAACTTAATTTTGAATTTTATTTTTAATCTTTTT	G	0	A	C	haplotype-L	indca
Zhengui9	A	ATTATGCTTATAAGACAAAGCTTAAATTTTAAACTTAATTTTGAATTTTATTTTTAATCTTTTT	G	0	A	C	haplotype-L	indca
Raowan6	A	ATTATGCTTATAAGACAAAGCTTAAATTTTAAACTTAATTTTGAATTTTATTTTTAATCTTTTT	G	0	A	C	haplotype-L	indca
Luowanxian2	A	ATTATGCTTATAAGACAAAGCTTAAATTTTAAACTTAATTTTGAATTTTATTTTTAATCTTTTT	G	0	A	C	haplotype-L	indca
Shaner59	A	ATTATGCTTATAAGACAAAGCTTAAATTTTAAACTTAATTTTGAATTTTATTTTTAATCTTTTT	G	0	A	C	haplotype-L	indca
Wannuo53nuo	A	ATTATGCTTATAAGACAAAGCTTAAATTTTAAACTTAATTTTGAATTTTATTTTTAATCTTTTT	G	0	A	C	haplotype-L	indca
Xiangsimiao2	A	ATTATGCTTATAAGACAAAGCTTAAATTTTAAACTTAATTTTGAATTTTATTTTTAATCTTTTT	G	0	A	C	haplotype-L	indca
Qixiuzhan3	A	ATTATGCTTATAAGACAAAGCTTAAATTTTAAACTTAATTTTGAATTTTATTTTTAATCTTTTT	G	0	A	C	haplotype-L	indca
Chansizhan	A	ATTATGCTTATAAGACAAAGCTTAAATTTTAAACTTAATTTTGAATTTTATTTTTAATCTTTTT	G	0	A	C	haplotype-L	indca
Yuexinzhan5	A	ATTATGCTTATAAGACAAAGCTTAAATTTTAAACTTAATTTTGAATTTTATTTTTAATCTTTTT	G	0	A	C	haplotype-L	indca
Xingfengzhan2	A	ATTATGCTTATAAGACAAAGCTTAAATTTTAAACTTAATTTTGAATTTTATTTTTAATCTTTTT	G	0	A	C	haplotype-L	indca
Mabaojin	A	ATTATGCTTATAAGACAAAGCTTAAATTTTAAACTTAATTTTGAATTTTATTTTTAATCTTTTT	G	0	A	C	haplotype-L	indca
Nongdu4	A	ATTATGCTTATAAGACAAAGCTTAAATTTTAAACTTAATTTTGAATTTTATTTTTAATCTTTTT	G	0	A	C	haplotype-L	indca
Laian19	A	ATTATGCTTATAAGACAAAGCTTAAATTTTAAACTTAATTTTGAATTTTATTTTTAATCTTTTT	G	0	A	C	haplotype-L	indca
Zhongyu1	A	ATTATGCTTATAAGACAAAGCTTAAATTTTAAACTTAATTTTGAATTTTATTTTTAATCTTTTT	G	0	A	C	haplotype-L	indca
Aoqingzhan	A	ATTATGCTTATAAGACAAAGCTTAAATTTTAAACTTAATTTTGAATTTTATTTTTAATCTTTTT	G	0	A	C	haplotype-L	indca
Shengyou2	A	ATTATGCTTATAAGACAAAGCTTAAATTTTAAACTTAATTTTGAATTTTATTTTTAATCTTTTT	G	0	A	C	haplotype-L	indca
Huaxianzhan	A	ATTATGCTTATAAGACAAAGCTTAAATTTTAAACTTAATTTTGAATTTTATTTTTAATCTTTTT	G	0	A	C	haplotype-L	indca
Jiahezaozhan	A	ATTATGCTTATAAGACAAAGCTTAAATTTTAAACTTAATTTTGAATTTTATTTTTAATCTTTTT	G	0	A	C	haplotype-L	indca
Mancang515	A	ATTATGCTTATAAGACAAAGCTTAAATTTTAAACTTAATTTTGAATTTTATTTTTAATCTTTTT	G	0	A	C	haplotype-L	indca
Lvhuangzhan	A	ATTATGCTTATAAGACAAAGCTTAAATTTTAAACTTAATTTTGAATTTTATTTTTAATCTTTTT	G	0	A	C	haplotype-L	indca
Xiangzaoxian22	A	ATTATGCTTATAAGACAAAGCTTAAATTTTAAACTTAATTTTGAATTTTATTTTTAATCTTTTT	G	0	A	C	haplotype-L	indca
Dongnong424	A	ATTATGCTTATAAGACAAAGCTTAAATTTTAAACTTAATTTTGAATTTTATTTTTAATCTTTTT	G	0	A	C	haplotype-L	indca
Bakiella 1	A	ATTATGCTTATAAGACAAAGCTTAAATTTTAAACTTAATTTTGAATTTTATTTTTAATCTTTTT	G	0	A	C	haplotype-L	indca
Jumli dhan	A	ATTATGCTTATAAGACAAAGCTTAAATTTTAAACTTAATTTTGAATTTTATTTTTAATCTTTTT	G	0	A	C	haplotype-L	indca
CNTLR80076-44-1-1-1	A	ATTATGCTTATAAGACAAAGCTTAAATTTTAAACTTAATTTTGAATTTTATTTTTAATCTTTTT	G	0	A	C	haplotype-L	indca
IR 58614-B-B-8-2	A	ATTATGCTTATAAGACAAAGCTTAAATTTTAAACTTAATTTTGAATTTTATTTTTAATCTTTTT	G	0	A	C	haplotype-L	indca
4484	A	ATTATGCTTATAAGACAAAGCTTAAATTTTAAACTTAATTTTGAATTTTATTTTTAATCTTTTT	G	0	A	C	haplotype-L	indca
EMBRAPA 1200	A	ATTATGCTTATAAGACAAAGCTTAAATTTTAAACTTAATTTTGAATTTTATTTTTAATCTTTTT	G	0	A	C	haplotype-L	indca
Shimla Early	A	ATTATGCTTATAAGACAAAGCTTAAATTTTAAACTTAATTTTGAATTTTATTTTTAATCTTTTT	G	0	A	C	haplotype-L	indca
Tranoeup Beykher	A	ATTATGCTTATAAGACAAAGCTTAAATTTTAAACTTAATTTTGAATTTTATTTTTAATCTTTTT	G	0	A	C	haplotype-L	indca
Chin Chin	A	ATTATGCTTATAAGACAAAGCTTAAATTTTAAACTTAATTTTGAATTTTATTTTTAATCTTTTT	G	0	A	C	haplotype-L	indca
RP2151-173-1-8	A	ATTATGCTTATAAGACAAAGCTTAAATTTTAAACTTAATTTTGAATTTTATTTTTAATCTTTTT	G	0	A	C	haplotype-L	indca
HB-6-2	A	ATTATGCTTATAAGACAAAGCTTAAATTTTAAACTTAATTTTGAATTTTATTTTTAATCTTTTT	G	0	A	C	haplotype-L	indca
ECIA76-S89-1	A	ATTATGCTTATAAGACAAAGCTTAAATTTTAAACTTAATTTTGAATTTTATTTTTAATCTTTTT	G	0	A	C	haplotype-L	indca
Huangkedao	A	ATTATGCTTATAAGACAAAGCTTAAATTTTAAACTTAATTTTGAATTTTATTTTTAATCTTTTT	G	0	A	C	haplotype-L	indca
BuleidaA-75	A	ATTATGCTTATAAGACAAAGCTTAAATTTTAAACTTAATTTTGAATTTTATTTTTAATCTTTTT	G	0	A	C	haplotype-L	indca
WD-16376	A	ATTATGCTTATAAGACAAAGCTTAAATTTTAAACTTAATTTTGAATTTTATTTTTAATCTTTTT	G	0	A	C	haplotype-L	indca
Zhenfu8	A	ATTATGCTTATAAGACAAAGCTTAAATTTTAAACTTAATTTTGAATTTTATTTTTAATCTTTTT	G	0	A	C	haplotype-L	indca
WD-17403	A	ATTATGCTTATAAGACAAAGCTTAAATTTTAAACTTAATTTTGAATTTTATTTTTAATCTTTTT	G	0	A	C	haplotype-L	indca
WD-17862	A	ATTATGCTTATAAGACAAAGCTTAAATTTTAAACTTAATTTTGAATTTTATTTTTAATCTTTTT	G	0	A	C	haplotype-L	indca
WD-18366	A	ATTATGCTTATAAGACAAAGCTTAAATTTTAAACTTAATTTTGAATTTTATTTTTAATCTTTTT	G	0	A	C	haplotype-L	indca
WD-18495	A	ATTATGCTTATAAGACAAAGCTTAAATTTTAAACTTAATTTTGAATTTTATTTTTAATCTTTTT	G	0	A	C	haplotype-L	indca
WD-18547	A	ATTATGCTTATAAGACAAAGCTTAAATTTTAAACTTAATTTTGAATTTTATTTTTAATCTTTTT	G	0	A	C	haplotype-L	indca
Dongtingwanxian	A	ATTATGCTTATAAGACAAAGCTTAAATTTTAAACTTAATTTTGAATTTTATTTTTAATCTTTTT	G	0	A	C	haplotype-L	indca
Xibainian	A	ATTATGCTTATAAGACAAAGCTTAAATTTTAAACTTAATTTTGAATTTTATTTTTAATCTTTTT	G	0	A	C	haplotype-L	indca
Gu154	A	ATTATGCTTATAAGACAAAGCTTAAATTTTAAACTTAATTTTGAATTTTATTTTTAATCTTTTT	G	0	A	C	haplotype-L	indca
IR 661-1	A	ATTATGCTTATAAGACAAAGCTTAAATTTTAAACTTAATTTTGAATTTTATTTTTAATCTTTTT	G	0	A	C	haplotype-L	indca
Lengshuinou	A	ATTATGCTTATAAGACAAAGCTTAAATTTTAAACTTAATTTTGAATTTTATTTTTAATCTTTTT	G	0	A	C	haplotype-L	indca
Bolvguangnian	A	ATTATGCTTATAAGACAAAGCTTAAATTTTAAACTTAATTTTGAATTTTATTTTTAATCTTTTT	G	0	A	C	haplotype-L	indca
Jinnante43B	A	ATTATGCTTATAAGACAAAGCTTAAATTTTAAACTTAATTTTGAATTTTATTTTTAATCTTTTT	G	0	A	C	haplotype-L	indca
Shaxuan10	A	ATTATGCTTATAAGACAAAGCTTAAATTTTAAACTTAATTTTGAATTTTATTTTTAATCTTTTT	G	0	A	C	haplotype-L	indca
WD-18424	A	ATTATGCTTATAAGACAAAGCTTAAATTTTAAACTTAATTTTGAATTTTATTTTTAATCTTTTT	G	0	A	C	haplotype-L	indca
WD-15786	A	ATTATGCTTATAAGACAAAGCTTAAATTTTAAACTTAATTTTGAATTTTATTTTTAATCTTTTT	G	0	A	C	haplotype-L	indca
Songgeng9	A	ATTATGCTTATAAGACAAAGCTTAAATTTTAAACTTAATTTTGAATTTTATTTTTAATCTTTTT	G	0	A	C	haplotype-L	indca
WD-17685	A	ATTATGCTTATAAGACAAAGCTTAAATTTTAAACTTAATTTTGAATTTTATTTTTAATCTTTTT	G	0	A	C	haplotype-L	indca
Xinlonggeng3	A	ATTATGCTTATAAGACAAAGCTTAAATTTTAAACTTAATTTTGAATTTTATTTTTAATCTTTTT	G	0	A	C	haplotype-L	indca
WD-15146	A	ATTATGCTTATAAGACAAAGCTTAAATTTTAAACTTAATTTTGAATTTTATTTTTAATCTTTTT	G	0	A	C	haplotype-L	indca
Zaoshunonghu6	A	ATTATGCTTATAAGACAAAGCTTAAATTTTAAACTTAATTTTGAATTTTATTTTTAATCTTTTT	G	0	A	C	haplotype-L	indca
Lunhui422	A	ATTATGCTTATAAGACAAAGCTTAAATTTTAAACTTAATTTTGAATTTTATTTTTAATCTTTTT	G	0	A	C	haplotype-L	indca
A 152	A	ATTATGCTTATAAGACAAAGCTTAAATTTTAAACTTAATTTTGAATTTTATTTTTAATCTTTTT	G	0	G	C	haplotype-L	indca
WD-18141	A	ATTATGCTTATAAGACAAAGCTTAAATTTTAAACTTAATTTTGAATTTTATTTTTAATCTTTTT	G	0	G	C	haplotype-L	indca
Red Khosha Cerma	A	ATTATGCTTATAAGACAAAGCTTAAATTTTAAACTTAATTTTGAATTTTATTTTTAATCTTTTT	G	0	A	C	haplotype-L	indca
Lua Chua Chan	A	ATTATGCTTATAAGACAAAGCTTAAATTTTAAACTTAATTTTGAATTTTATTTTTAATCTTTTT	G	0	A	C	haplotype-L	indca
9311	A	ATTATGCTTATAAGACAAAGCTTAAATTTTAAACTTAATTTTGAATTTTATTTTTAATCTTTTT	G	0	A	C	haplotype-L	indca
ARC 10633	A	ATTATGCTTATAAGACAAAGCTTAAATTTTAAACTTAATTTTGAATTTTATTTTTAATCTTTTT	G	0	A	C	haplotype-L	indca
Changzao105	A	ATTATGCTTATAAGACAAAGCTTAAATTTTAAACTTAATTTTGAATTTTATTTTTAATCTTTTT	G	0	A	C	haplotype-L	indca
IR 9660-48-1-1-2	A	ATTATGCTTATAAGACAAAGCTTAAATTTTAAACTTAATTTTGAATTTTATTTTTAATCTTTTT	G	0	A	C	haplotype-L	indca
WD-16161	A	ATTATGCTTATAAGACAAAGCTTAAATTTTAAACTTAATTTTGAATTTTATTTTTAATCTTTTT	G	0	A	C	haplotype-L	indca
Taizhong65	A	ATTATGCTTATAAGACAAAGCTTAAATTTTAAACTTAATTTTGAATTTTATTTTTAATCTTTTT	G	0	A	C	haplotype-L	indca
Habataki	A	ATTATGCTTATAAGACAAAGCTTAAATTTTAAACTTAATTTTGAATTTTATTTTTAATCTTTTT	G	0	A	C	haplotype-L	indca
Sanjiang1	A	ATTATGCTTATAAGACAAAGCTTAAATTTTAAACTTAATTTTGAATTTTATTTTTAATCTTTTT	G	0	A	C	haplotype-L	indca
WD-17556	A	ATTATGCTTATAAGACAAAGCTTAAATTTTAAACTTAATTTTGAATTTTATTTTTAATCTTTTT	G	0	A	C	haplotype-L	indca
Nipponbare	A	ATTATGCTTATAAGACAAAGCTTAAATTTTAAACTTAATTTTGAATTTTATTTTTAATCTTTTT	G	0	A	C	haplotype-L	japonica

## Sheet: Supplementary Table 6
Supplementary Table 6. Prediction of transcription factors binding to the 64-bp sequence in Chalk9.
Matrix ID	Family	Position	Strand	Similar Score	Hit Sequence	TF ID or Motif name
TFmatrixID_0131	AT-Hook	47	-	1	TTTATtttt	Os06g0326000; Os07g0184800; Os08g0512400
TFmatrixID_0136	AT-Hook	47	-	1	TTTATttt	Os07g0184800
TFmatrixID_0148	AT-Hook	44	-	0.99	aATTTTat	Os02g0824300; Os06g0326000; Os07g0184800; Os08g0512400
TFmatrixID_0224	TCR	27	+	0.99	tTTTAAac	Os01g0761100
TFmatrixID_0227	TCR	38	+	0.98	atTTTGAatt	Os01g0761100
TFmatrixID_0296	Homeodomain; ZF-HD	53	+	1	ttTAATCttt	Os02g0706600
TF_motif_seq_0256	B3	3	+	0.8	TATGC	Os04g0676600; Os08g0101000

## Sheet: Supplementary Table 7
Supplementary Table 7. Expression analysis of starch and SSP genes generated from chalk9-1 vs Nip by RNA-seq.
Gene name	Locus	log2FoldChange	FDR	Direction
GluA1	LOC_Os01g55690	0.630589	8.69883e-99	No
GluA2	LOC_Os10g26060	0.558477	7.55051e-73	No
GluA3	LOC_Os03g31360	0.773459	3.66351e-132	No
GluB1a	LOC_Os02g15178	1.37548	6.31155e-16	Up
GluB1b	LOC_Os02g15169	1.70748	3.36688e-15	Up
GluB2	LOC_Os02g15150	1.20693	0	Up
GluB4	LOC_Os02g16830	1.2047	2.59483e-246	Up
GluB5	LOC_Os02g16820	1.08035	1.0209e-236	Up
GluB6	LOC_Os02g15070	1.43388	0	Up
GluB7	LOC_Os02g14600	1.58639	0	Up
GluD	LOC_Os02g15090	1.1124	0	Up
GluC	LOC_Os02g25640	0.955834	1.38796e-199	No
PROLM1	LOC_Os05g26240	0.814049	0.000396464	No
PROLM4	LOC_Os05g26350	1.06943	8.20032e-203	Up
PROLM10	LOC_Os05g26440	1.03979	3.59167e-23	Up
PROLM11	LOC_Os05g26460	1.28547	2.08353e-221	Up
PROLM12	LOC_Os05g26480	1.31729	2.16479e-134	Up
PROLM13	LOC_Os05g26490	1.76492	0.000815694	Up
PROLM14	LOC_Os05g26620	-0.349026	4.36136e-19	No
PROLM15	LOC_Os05g26690	1.23051	6.85382e-13	Up
PROLM16	LOC_Os05g26720	0.896968	1.35912e-124	No
PROLM17	LOC_Os05g26750	1.4282	0	Up
PROLM18	LOC_Os05g26770	0.70963	1.69651e-87	No
PROLM19	LOC_Os07g11900	1.4012	4.01992e-186	Up
PROLM20	LOC_Os07g11910	1.1802	7.83055e-303	Up
PROLM22	LOC_Os07g11920	1.34707	0	Up
PROLM23	LOC_Os06g31060	1.21551	3.93115e-119	Up
PROLM24	LOC_Os06g31070	0.750279	4.38583e-113	No
PROLM25	LOC_Os07g10570	0.927451	1.52982e-165	No
PROLM26	LOC_Os07g10580	0.762394	4.36662e-121	No
PROLM27	LOC_Os12g16880	1.59177	1.9065e-57	Up
PROLM28	LOC_Os12g16890	1.38063	1.93706e-276	Up
PROLM29	LOC_Os12g17010	1.02852	0.0900634	Up
PROLM30	LOC_Os12g17030	1.63848	6.43978e-165	Up
SSA2	LOC_Os03g55730	0.153039	0.0157782	No
SSA3	LOC_Os03g55734	-0.00672869	0.964413	No
SSA4	LOC_Os03g55740	1.23406	1.69615e-09	Up
SSA1	LOC_Os05g41970	0.533591	7.22979e-66	No
SSA5	LOC_Os11g33000	1.70969	0	Up
7S globulin 2	LOC_Os01g71094	0.489127	0.221773	No
7S globulin	LOC_Os05g33400	0.175692	0.588274	No
OsAGPS1	LOC_Os09g12660	-0.0124332	0.809709	No
OsAGPS2a	LOC_Os08g25734	0.897128	6.80927e-193	No
OsAGPS2b	LOC_Os08g25734	0.897128	6.80927e-193	No
OsAGPL1	LOC_Os05g50380	-0.0963926	0.00247783	No
OsAGPL2/GIF2	LOC_Os01g44220	0.958232	4.8447e-205	No
OsAGPL3	LOC_Os03g52460	0.0310767	0.795533	No
OsAGPL4	LOC_Os07g13980	-0.133461	0.320265	No
OsBt1	LOC_Os02g10800	0.504184	6.12874e-52	No
OsGBSSI/WX	LOC_Os06g04200	1.1191	3.05116e-272	Up
OsGBSSII	LOC_Os07g22930	-0.16828	0.104928	No
OsSSIIa/SSII-3/ALK	LOC_Os06g12450	0.943189	3.05784e-202	No
OsSSIIb/SSII-2	LOC_Os02g51070	-0.179476	0.197467	No
OsSSIIIa/SSIII-2/Flo5	LOC_Os08g09230	0.537922	1.78529e-50	No
OsSSIIIb/SSIII-1	LOC_Os04g53310	-0.586649	5.73603e-21	No
OsSSIVb/SSIV-2	LOC_Os05g45720	0.260036	1.16809e-06	No
OsSBEI/SBE1	LOC_Os06g51084	0.739413	2.49516e-131	No
OsSBEIIa/SBE4	LOC_Os04g33460	-0.222027	0.00156658	No
OsSBEIIb/SBE3	LOC_Os02g32660	1.06018	3.82582e-257	Up
OsISA1	LOC_Os08g40930	0.389061	1.48705e-33	No
OsISA2	LOC_Os05g32710	0.705052	4.15776e-52	No
OsISA3	LOC_Os09g29404	-0.814634	2.05346e-111	No
OsPHOL/PHO1	LOC_Os03g55090	1.12642	1.76067e-249	Up

## Sheet: Supplementary Table 8
Supplementary Table 8. Putative cis-regulatory elements identified in the promoters of genes involved in starch and storage protein biosynthesis.
Locus	Gene name	Putative cis-element	sequence region
LOC_Os02g15178	GluB1a	GCC-box	-1176 to -1181 bp
		GCC box-like	-1586 to -1591 bp
LOC_Os02g15150	GluB2	GCC box-like	-387 to -392 bp
LOC_Os02g16830	GluB4	GCC-box	-1380 to -1385 bp
		GCC-box	-1922 to -1927 bp
		GCC box-like	-61 to -66 bp
LOC_Os02g16820	GluB5	GCC-box	-1380 to -1385 bp
		GCC-box	-1922 to -1927 bp
		GCC box-like	-61 to -66 bp
LOC_Os02g15070	GluB6	GCC-box	-746 to -741 bp
LOC_Os05g26440	PROLM10	GCC-box	-1685 to -1680 bp
			-1590 to -1585 bp
			-1542 to -1537 bp
			-1515 to -1510 bp
			-1486 to -1478 bp
			-1460 to -1455 bp
			-1360 to -1352 bp
			-1256 to -1251 bp
			-1219 to -1214 bp
			-1039 to -1034 bp
			-896 to -891 bp
			-881 to -873 bp
			-853 to -848 bp
LOC_Os05g26480	PROLM12	GCC-box	-1576 to -1572 bp
			-1457 to -1451 bp
			-1396 to -1391 bp
			-1279 to -1274 bp
			-1184 to -1179 bp
			-1144 to -1139 bp
			-1125 to -1117 bp
			-1053 to -1048 bp
			-1006 to -998 bp
			-792 to -784 bp
			-766 to -755 bp
LOC_Os05g26750	PROLM17	GCC-box	-1788 to -1783 bp
LOC_Os07g11900	PROLM19	GCC box-like	-1644 to -1639 bp
		GCC box-like	-848 to -853 bp
LOC_Os07g11910	PROLM20	GCC box-like	-848 to -853 bp
		GCC box-like	-1639 to -1644 bp
LOC_Os06g31060	PROLM23	GCC-box	-1716 to -1721 bp
		GCC-box	-1490 to -1195 bp
		GCC box-like	-12 to -17 bp
LOC_Os12g16880	PROLM27	GCC box-like	-1700 to -1695 bp
			-1593 to -1588 bp
			-277 to -272 bp
LOC_Os12g16890	PROLM28	GCC box-like	-1832 to -1827 bp
			-1696 to -1691 bp
LOC_Os12g17010	PROLM29	GCC-box	-687 to -682 bp
		GCC-box	-639 to -634 bp
		GCC-box	-612 to -607 bp
		GCC-box	-583 to -578 bp
		GCC-box	-557 to -552 bp
		GCC-box	-457 to -449 bp
		GCC-box	-316 to -311 bp
		GCC-box	-240 to -235 bp

## Sheet: Supplementary Table 9
Supplementary Table 9. The SNPs at the OsEBP89 gene region define one major haplotype in indica varieties. The position corresponds to the coordinates in the chromosome 3 of Nipponbare genome.
Position	4343854	4343858	4344150	4344392	4344492	4344552	4344642	4345167	4345168	4345648	4345787	4345956	4345997	4346017	4346080	4346353	4346364	4346391	4346679	4346682	4346989	4347100	4347361	indica
Hap1	T	G	A	A	G	A	A	A	A	C	G	T	T	C	C	G	C	A	A	T	G	G	A	119
Hap2	C	T	C	G	T	C	C	G	C	C	C	G	T	A	T	A	A	C	C	C	A	A	C	3

## Sheet: Supplementary Table  10
Supplementary Table 10. The SNPs at the OsEBP89 gene region from sequencing data of 4,726 rice accessions. The position corresponds to the coordinates in thechromosome 3 of Nipponbare genome. The 34 SNPs with MAF ≥1% define 4 haplotypes.
position	Haplotype1	Haplotype2	Haplotype3	Haplotype4
4343854	C	C	T	C
4343858	T	T	G	T
4343880	C	C	C	C
4344042	G	G	G	G
4344150	C	C	A	C
4344392	G	G	A	G
4344421	C	C	C	C
4344492	T	T	G	T
4344552	C	C	A	C
4344642	C	C	A	C
4344670	C	C	T	C
4344673	C	C	C	C
4344719	A	A	C	A
4344725	C	C	T	C
4344744	T	T	A	T
4344745	G	G	T	G
4344754	T	T	C	C
4344755	A	A	G	A
4344764	T	T	T	T
4344765	G	G	G	G
4344769	G	G	A	G
4344784	A	A	T	A
4344786	G	G	G	G
4344795	C	C	C	C
4344808	C	C	T	C
4344810	C	C	C	T
4344811	G	G	A	A
4344813	A	A	G	A
4344852	T	T	T	T
4344993	A	A	A	A
4345167	G	G	A	G
4345168	C	C	A	C
4345492	G	G	G	A
4345648	T	C	C	C
indica	32	11	2624	25
Japonica	787	368	29	250
Aus	47	0	137	2
Intermediate	26	13	40	68

[truncated: 4 more sheets: Supplementary Table11, Supplementary Table 12, Supplementary Table 13, Supplementary Table 14]
