# Supplementary material for: Natural Variation of Chalk9 Regulates Grain Chalkiness in Rice
Source: Research Square preprint supplement (doi:10.21203/rs.3.rs-5850266/v1), 2025-01-29
Supplement: Supplementary file 2 [file f25f16efba100b0553b39794.xlsx]

## Sheet: Supplementary Data 1
Supplementary Data 1. 2,658 differentially expressed genes generated from chalk9-1 vs Nip. FDR, false discovery rate.
ID	log2FoldChange	FDR	Direction	Swiss-Prot
LOC_Os01g35330	4.68532	0	Up	NA
LOC_Os12g36830	4.08824	0	Up	sp|P38948|MPAG1_ALNGL Major pollen allergen Aln g 1 OS=Alnus glutinosa OX=3517 PE=1 SV=2
LOC_Os03g21660	3.50369	0	Up	sp|Q9SZL8|FRS5_ARATH Protein FAR1-RELATED SEQUENCE 5 OS=Arabidopsis thaliana OX=3702 GN=FRS5 PE=1 SV=1
LOC_Os03g02470	1.76116	0	Up	--
LOC_Os11g33000	1.70969	0	Up	sp|A2XMB2|PROA_ORYSI 10 kDa prolamin OS=Oryza sativa subsp. indica OX=39946 GN=OsI_013205 PE=2 SV=2
LOC_Os02g14600	1.58639	0	Up	sp|Q6ERU3|GLUB5_ORYSJ Glutelin type-B 5 OS=Oryza sativa subsp. japonica OX=39947 GN=GLUB5 PE=2 SV=1
LOC_Os02g15070	1.43388	0	Up	sp|Q02897|GLUB2_ORYSJ Glutelin type-B 2 OS=Oryza sativa subsp. japonica OX=39947 GN=GLUB2 PE=2 SV=2
LOC_Os03g50490	1.43383	0	Up	sp|Q4W8D0|GLN13_ORYSJ Glutamine synthetase cytosolic isozyme 1-3 OS=Oryza sativa subsp. japonica OX=39947 GN=GLN1-3 PE=2 SV=1
LOC_Os05g26750	1.4282	0	Up	sp|P0C5E5|PRO7_ORYSI Prolamin PPROL 14E OS=Oryza sativa subsp. indica OX=39946 PE=3 SV=1
LOC_Os07g11920	1.34707	0	Up	sp|Q42465|PRO20_ORYSJ Prolamin PPROL 14P OS=Oryza sativa subsp. japonica OX=39947 GN=PROLM20 PE=2 SV=1
LOC_Os04g39560	1.3363	0	Up	--
LOC_Os02g02410	1.32535	0	Up	sp|Q6Z7B0|BIP1_ORYSJ Heat shock 70 kDa protein BIP1 OS=Oryza sativa subsp. japonica OX=39947 GN=BIP1 PE=1 SV=1
LOC_Os02g15150	1.20693	0	Up	sp|Q02897|GLUB2_ORYSJ Glutelin type-B 2 OS=Oryza sativa subsp. japonica OX=39947 GN=GLUB2 PE=2 SV=2
LOC_Os12g14070	1.20152	0	Up	sp|Q02028|HSP7S_PEA Stromal 70 kDa heat shock-related protein, chloroplastic OS=Pisum sativum OX=3888 GN=HSP70 PE=2 SV=1
LOC_Os02g15090	1.1124	0	Up	sp|Q6K508|GLUD1_ORYSJ Glutelin type-D 1 OS=Oryza sativa subsp. japonica OX=39947 GN=GLUD1 PE=2 SV=1
LOC_Os07g11910	1.1802	7.83055e-303	Up	sp|Q42465|PRO20_ORYSJ Prolamin PPROL 14P OS=Oryza sativa subsp. japonica OX=39947 GN=PROLM20 PE=2 SV=1
LOC_Os11g47520	1.47227	5.83007e-283	Up	sp|Q53NL5|XIP2_ORYSJ Xylanase inhibitor protein 2 OS=Oryza sativa subsp. japonica OX=39947 GN=Chib3H-h PE=1 SV=1
LOC_Os10g36880	1.2871	3.25597e-281	Up	sp|Q9FW70|KN7K_ORYSJ Kinesin-like protein KIN-7K, chloroplastic OS=Oryza sativa subsp. japonica OX=39947 GN=KIN7K PE=2 SV=2
LOC_Os12g16890	1.38063	1.93706e-276	Up	sp|P20698|PRO28_ORYSJ Prolamin PPROL 17D OS=Oryza sativa subsp. japonica OX=39947 GN=Os12g0269200 PE=2 SV=2
LOC_Os06g04200	1.1191	3.05116e-272	Up	sp|A2Y8X2|SSG1_ORYSI Granule-bound starch synthase 1, chloroplastic/amyloplastic OS=Oryza sativa subsp. indica OX=39946 GN=WAXY PE=1 SV=2
LOC_Os10g14230	7.23778	1.78783e-265	Up	sp|P08770|TRA1_MAIZE Putative AC transposase OS=Zea mays OX=4577 PE=2 SV=2
LOC_Os06g38960	1.39288	1.5886e-258	Up	--
LOC_Os02g32660	1.06018	3.82582e-257	Up	sp|Q08047|GLGB_MAIZE 1,4-alpha-glucan-branching enzyme 2, chloroplastic/amyloplastic OS=Zea mays OX=4577 GN=SBE1 PE=1 SV=1
LOC_Os03g55090	1.12642	1.76067e-249	Up	sp|P27598|PHSL_IPOBA Alpha-1,4 glucan phosphorylase L isozyme, chloroplastic/amyloplastic OS=Ipomoea batatas OX=4120 PE=2 SV=1
LOC_Os08g01370	-1.08538	5.61425e-249	Down	--
LOC_Os02g16830	1.2047	2.59483e-246	Up	sp|P14614|GLUB4_ORYSJ Glutelin type-B 4 OS=Oryza sativa subsp. japonica OX=39947 GN=GLUB4 PE=1 SV=1
LOC_Os04g09900	4.67151	2.17309e-243	Up	sp|Q0JF02|CPS4_ORYSJ Syn-copalyl diphosphate synthase OS=Oryza sativa subsp. japonica OX=39947 GN=CPS4 PE=2 SV=1
LOC_Os05g06440	1.25577	9.85302e-243	Up	sp|B9FHF3|DJB6_ORYSJ DnaJ protein ERDJ3B OS=Oryza sativa subsp. japonica OX=39947 GN=ERDJ3B PE=1 SV=1
LOC_Os07g08420	1.24622	3.00205e-237	Up	sp|Q6ZLB0|RSBZ1_ORYSJ bZIP transcription factor RISBZ1 OS=Oryza sativa subsp. japonica OX=39947 GN=RISBZ1 PE=1 SV=1
LOC_Os02g16820	1.08035	1.0209e-236	Up	sp|Q6ERU3|GLUB5_ORYSJ Glutelin type-B 5 OS=Oryza sativa subsp. japonica OX=39947 GN=GLUB5 PE=2 SV=1
LOC_Os02g15350	1.13428	2.35687e-235	Up	sp|Q6K537|DOF3_ORYSJ Dof zinc finger protein 3 OS=Oryza sativa subsp. japonica OX=39947 GN=DOF3 PE=1 SV=1
LOC_Os08g34190	1.47305	3.70432e-234	Up	sp|Q93ZE8|SDF2_ARATH Stromal cell-derived factor 2-like protein OS=Arabidopsis thaliana OX=3702 GN=SDF2 PE=1 SV=1
LOC_Os02g55560	1.10766	1.69406e-233	Up	sp|Q69QZ0|P2C27_ORYSJ Probable protein phosphatase 2C 27 OS=Oryza sativa subsp. japonica OX=39947 GN=Os02g0799000 PE=2 SV=1
LOC_Os04g42770	1.12625	3.86063e-232	Up	--
LOC_Os01g04380	-2.38804	1.6463e-230	Down	sp|Q943E6|HS16B_ORYSJ 16.9 kDa class I heat shock protein 2 OS=Oryza sativa subsp. japonica OX=39947 GN=HSP16.9B PE=2 SV=1
LOC_Os05g26460	1.28547	2.08353e-221	Up	sp|P0C5E5|PRO7_ORYSI Prolamin PPROL 14E OS=Oryza sativa subsp. indica OX=39946 PE=3 SV=1
LOC_Os02g37480	-1.08244	2.49586e-216	Down	--
LOC_Os04g33150	1.03459	3.24828e-216	Up	sp|P22242|DRPE_CRAPL Desiccation-related protein PCC13-62 OS=Craterostigma plantagineum OX=4153 PE=2 SV=1
LOC_Os10g35800	1.02963	1.08197e-214	Up	--
LOC_Os02g36210	3.91566	2.89513e-213	Up	sp|Q6Z5I0|CPS2_ORYSJ Ent-copalyl diphosphate synthase 2 OS=Oryza sativa subsp. japonica OX=39947 GN=CPS2 PE=2 SV=1
LOC_Os12g24050	4.58203	1.25467e-212	Up	sp|P92523|M860_ARATH Uncharacterized mitochondrial protein AtMg00860 OS=Arabidopsis thaliana OX=3702 GN=AtMg00860 PE=4 SV=1
LOC_Os02g48480	1.19404	3.27253e-209	Up	sp|Q9SVC4|OEP7_ARATH Outer envelope membrane protein 7 OS=Arabidopsis thaliana OX=3702 GN=OEP7 PE=1 SV=1
LOC_Os12g05050	1.04939	2.13705e-205	Up	sp|P24805|TSJT1_TOBAC Stem-specific protein TSJT1 OS=Nicotiana tabacum OX=4097 GN=TSJT1 PE=2 SV=1
LOC_Os05g26350	1.06943	8.20032e-203	Up	sp|P0C5E5|PRO7_ORYSI Prolamin PPROL 14E OS=Oryza sativa subsp. indica OX=39946 PE=3 SV=1
LOC_Os06g30370	1.2507	9.56258e-202	Up	sp|Q656A5|MFT1_ORYSJ Protein MOTHER of FT and TFL1 homolog 1 OS=Oryza sativa subsp. japonica OX=39947 GN=MFT1 PE=3 SV=1
LOC_Os03g14642	2.98203	2.43557e-201	Up	sp|Q9SU35|ERLL1_ARATH pEARLI1-like lipid transfer protein 1 OS=Arabidopsis thaliana OX=3702 GN=AZI1 PE=1 SV=1
LOC_Os02g40240	2.41584	2.50047e-201	Up	sp|Q2R2D5|XA21_ORYSJ Receptor kinase-like protein Xa21 OS=Oryza sativa subsp. japonica OX=39947 GN=XA21 PE=1 SV=1
LOC_Os04g28420	-1.31395	6.80927e-193	Down	sp|Q43207|FKB70_WHEAT 70 kDa peptidyl-prolyl isomerase OS=Triticum aestivum OX=4565 GN=FKBP70 PE=1 SV=1
LOC_Os01g18860	3.33031	1.30712e-191	Up	sp|Q9LGU6|METK3_ORYSJ S-adenosylmethionine synthase 3 OS=Oryza sativa subsp. japonica OX=39947 GN=METK3 PE=2 SV=1
LOC_Os03g21620	1.08152	2.48272e-190	Up	sp|Q39030|KPK2_ARATH Serine/threonine-protein kinase AtPK2/AtPK19 OS=Arabidopsis thaliana OX=3702 GN=ATPK2 PE=1 SV=2
LOC_Os01g08860	-1.26201	1.79396e-187	Down	sp|Q5VRY1|HSP18_ORYSJ 18.0 kDa class II heat shock protein OS=Oryza sativa subsp. japonica OX=39947 GN=HSP18.0 PE=2 SV=1
LOC_Os09g27830	1.15194	2.26248e-186	Up	sp|Q67UF5|PDI23_ORYSJ Protein disulfide isomerase-like 2-3 OS=Oryza sativa subsp. japonica OX=39947 GN=PDIL2-3 PE=2 SV=1
LOC_Os07g11900	1.4012	4.01992e-186	Up	sp|Q42465|PRO20_ORYSJ Prolamin PPROL 14P OS=Oryza sativa subsp. japonica OX=39947 GN=PROLM20 PE=2 SV=1
LOC_Os06g37560	1.1253	1.31571e-185	Up	sp|Q5Z7L0|BGAL9_ORYSJ Beta-galactosidase 9 OS=Oryza sativa subsp. japonica OX=39947 GN=Os06g0573600 PE=2 SV=1
LOC_Os01g01290	1.41171	1.14991e-180	Up	sp|Q9XE33|NFYC6_ORYSJ Nuclear transcription factor Y subunit C-6 OS=Oryza sativa subsp. japonica OX=39947 GN=NFYC6 PE=1 SV=1
LOC_Os03g14590	1.06444	1.53837e-180	Up	--
LOC_Os10g26430	2.42312	2.12573e-177	Up	sp|Q500V5|AGDP1_ARATH Protein AGENET DOMAIN (AGD)-CONTAINING P1 OS=Arabidopsis thaliana OX=3702 GN=AGDP1 PE=1 SV=1
LOC_Os07g26100	8.41911	3.05294e-177	Up	--
LOC_Os07g34520	-1.24401	1.18053e-175	Down	sp|Q6Z6M4|ACEA_ORYSJ Isocitrate lyase OS=Oryza sativa subsp. japonica OX=39947 GN=ICL PE=1 SV=1
LOC_Os01g52650	2.68162	8.94327e-174	Up	sp|Q9FZA2|AGP31_ARATH Non-classical arabinogalactan protein 31 OS=Arabidopsis thaliana OX=3702 GN=AGP31 PE=1 SV=1
LOC_Os11g43820	1.02373	6.44785e-172	Up	sp|Q9SJE2|FATB_ARATH Palmitoyl-acyl carrier protein thioesterase, chloroplastic OS=Arabidopsis thaliana OX=3702 GN=FATB PE=1 SV=1
LOC_Os02g02400	1.12914	1.05835e-167	Up	sp|P0C549|CATA1_ORYSI Catalase isozyme A OS=Oryza sativa subsp. indica OX=39946 PE=2 SV=1
LOC_Os08g06380	1.24539	3.92693e-167	Up	sp|Q84UP7|CSLF6_ORYSJ Probable mixed-linked glucan synthase 6 OS=Oryza sativa subsp. japonica OX=39947 GN=CSLF6 PE=2 SV=1
LOC_Os03g10640	1.13378	1.01031e-165	Up	sp|O81108|ACA2_ARATH Calcium-transporting ATPase 2, plasma membrane-type OS=Arabidopsis thaliana OX=3702 GN=ACA2 PE=1 SV=1
LOC_Os08g08130	4.02579	2.12754e-165	Up	sp|Q9FHE1|GSTT3_ARATH Glutathione S-transferase T3 OS=Arabidopsis thaliana OX=3702 GN=GSTT3 PE=2 SV=1
LOC_Os12g17030	1.63848	6.43978e-165	Up	sp|P20698|PRO28_ORYSJ Prolamin PPROL 17D OS=Oryza sativa subsp. japonica OX=39947 GN=Os12g0269200 PE=2 SV=2
LOC_Os10g29549	1.02913	1.47646e-162	Up	--
LOC_Os01g09620	-1.13637	2.94165e-162	Down	sp|Q9FU27|C3H2_ORYSJ Zinc finger CCCH domain-containing protein 2 OS=Oryza sativa subsp. japonica OX=39947 GN=Os01g0192000 PE=2 SV=1
LOC_Os04g28120	1.54358	1.65567e-161	Up	sp|B8ASH8|ORR29_ORYSI Two-component response regulator ORR29 OS=Oryza sativa subsp. indica OX=39946 GN=RR29 PE=3 SV=1
LOC_Os01g57020	1.4865	7.65299e-159	Up	sp|Q9LX14|UFC_ARATH Protein UPSTREAM OF FLC OS=Arabidopsis thaliana OX=3702 GN=UFC PE=2 SV=1
LOC_Os01g24460	1.37968	8.30799e-156	Up	sp|Q9XE33|NFYC6_ORYSJ Nuclear transcription factor Y subunit C-6 OS=Oryza sativa subsp. japonica OX=39947 GN=NFYC6 PE=1 SV=1
LOC_Os08g28970	1.13849	1.1035e-155	Up	--
LOC_Os06g39875	1.13997	1.4044e-155	Up	sp|A2YEQ6|RAN3_ORYSI GTP-binding nuclear protein Ran-3 OS=Oryza sativa subsp. indica OX=39946 GN=RAN3 PE=2 SV=2
LOC_Os02g44820	-1.30773	1.0619e-152	Down	--
LOC_Os10g35150	1.24225	1.07751e-147	Up	--
LOC_Os10g36650	1.25143	1.4672e-144	Up	sp|P0C539|ACT2_ORYSI Actin-2 OS=Oryza sativa subsp. indica OX=39946 GN=ACT2 PE=3 SV=1
LOC_Os03g02180	1.82198	1.99442e-143	Up	sp|Q42600|C84A1_ARATH Cytochrome P450 84A1 OS=Arabidopsis thaliana OX=3702 GN=CYP84A1 PE=1 SV=1
LOC_Os07g38380	1.00478	7.53566e-141	Up	sp|Q5XF36|KMS1_ARATH Vacuole membrane protein KMS1 OS=Arabidopsis thaliana OX=3702 GN=KMS1 PE=1 SV=1
LOC_Os12g36850	3.25014	1.66358e-139	Up	sp|P19418|PR13_PETCR Pathogenesis-related protein B OS=Petroselinum crispum OX=4043 GN=PCPR1-3 PE=2 SV=1
LOC_Os09g37949	1.37903	4.44703e-139	Up	sp|P51567|AFC2_ARATH Serine/threonine-protein kinase AFC2 OS=Arabidopsis thaliana OX=3702 GN=AFC2 PE=1 SV=1
LOC_Os03g60720	-1.28943	3.10587e-137	Down	sp|Q852A1|EXPA7_ORYSJ Expansin-A7 OS=Oryza sativa subsp. japonica OX=39947 GN=EXPA7 PE=2 SV=1
LOC_Os02g08490	-1.45491	3.79557e-136	Down	sp|Q0E3C8|CLPB3_ORYSJ Chaperone protein ClpB3, mitochondrial OS=Oryza sativa subsp. japonica OX=39947 GN=CLPB3 PE=2 SV=3
LOC_Os08g03690	-1.86641	5.27682e-135	Down	sp|P10973|NLTPA_RICCO Non-specific lipid-transfer protein A OS=Ricinus communis OX=3988 PE=1 SV=1
LOC_Os02g36140	4.33744	8.96084e-135	Up	sp|Q0E088|KSL7_ORYSJ Ent-cassa-12,15-diene synthase OS=Oryza sativa subsp. japonica OX=39947 GN=KSL7 PE=2 SV=1
LOC_Os05g26480	1.31729	2.16479e-134	Up	sp|P0C5E5|PRO7_ORYSI Prolamin PPROL 14E OS=Oryza sativa subsp. indica OX=39946 PE=3 SV=1
LOC_Os11g06720	2.71989	4.56204e-133	Up	sp|A2ZBV1|ASR5_ORYSI Abscisic stress-ripening protein 5 OS=Oryza sativa subsp. indica OX=39946 GN=ASR5 PE=2 SV=1
LOC_Os02g52150	-1.82514	5.38069e-133	Down	sp|Q6Z7V2|HS24M_ORYSJ 24.1 kDa heat shock protein, mitochondrial OS=Oryza sativa subsp. japonica OX=39947 GN=HSP24.1 PE=2 SV=1
LOC_Os08g41780	-1.51868	2.36422e-132	Down	sp|Q67ZU1|LIP2_ARATH Triacylglycerol lipase 2 OS=Arabidopsis thaliana OX=3702 GN=LIP2 PE=2 SV=1
LOC_Os06g48200	-1.36481	3.98783e-129	Down	sp|Q38907|XTH25_ARATH Probable xyloglucan endotransglucosylase/hydrolase protein 25 OS=Arabidopsis thaliana OX=3702 GN=XTH25 PE=2 SV=2
LOC_Os02g57720	2.35812	8.52506e-127	Up	sp|Q9SXF8|PIP13_ORYSJ Aquaporin PIP 1-3 OS=Oryza sativa subsp. japonica OX=39947 GN=PIP1-3 PE=2 SV=2
LOC_Os06g37300	3.70469	9.97223e-122	Up	sp|Q0DBF4|C7018_ORYSJ Ent-sandaracopimaradiene 3-hydroxylase OS=Oryza sativa subsp. japonica OX=39947 GN=CYP701A8 PE=1 SV=1
LOC_Os06g31060	1.21551	3.93115e-119	Up	sp|P20698|PRO28_ORYSJ Prolamin PPROL 17D OS=Oryza sativa subsp. japonica OX=39947 GN=Os12g0269200 PE=2 SV=2
LOC_Os11g05170	-1.51036	4.23737e-119	Down	--
LOC_Os01g39850	1.20217	2.24529e-118	Up	sp|Q9XE33|NFYC6_ORYSJ Nuclear transcription factor Y subunit C-6 OS=Oryza sativa subsp. japonica OX=39947 GN=NFYC6 PE=1 SV=1
LOC_Os12g36860	3.86194	8.35894e-117	Up	sp|P43177|BEV1D_BETPN Major pollen allergen Bet v 1-D/H OS=Betula pendula OX=3505 GN=BETV1D PE=1 SV=2
LOC_Os10g31320	1.44921	4.7448e-116	Up	sp|P0C5C7|GRP2_ORYSI Glycine-rich cell wall structural protein 2 OS=Oryza sativa subsp. indica OX=39946 GN=GRP0.9 PE=2 SV=1
LOC_Os02g06430	1.09008	2.00094e-115	Up	--
LOC_Os02g39030	-1.426	4.13337e-115	Down	sp|Q9LTK0|IPP2_ARATH Protein phosphatase inhibitor 2 OS=Arabidopsis thaliana OX=3702 GN=I-2 PE=1 SV=1
LOC_Os04g35010	1.1533	6.25477e-114	Up	sp|Q9FXA3|BH095_ARATH Transcription factor bHLH95 OS=Arabidopsis thaliana OX=3702 GN=BHLH95 PE=2 SV=2
LOC_Os06g33480	1.28159	2.01057e-113	Up	sp|Q6EN42|PYL3_ORYSJ Abscisic acid receptor PYL3 OS=Oryza sativa subsp. japonica OX=39947 GN=PYL3 PE=1 SV=1
LOC_Os01g42960	1.20588	2.55015e-113	Up	sp|Q9MAH1|TTL1_ARATH TPR repeat-containing thioredoxin TTL1 OS=Arabidopsis thaliana OX=3702 GN=TTL1 PE=1 SV=1
LOC_Os02g51040	1.11209	4.59275e-112	Up	sp|Q6ZGU9|EXPA5_ORYSJ Expansin-A5 OS=Oryza sativa subsp. japonica OX=39947 GN=EXPA5 PE=2 SV=1
LOC_Os03g51610	1.02587	1.16774e-111	Up	sp|Q75GI4|ITPK3_ORYSJ Inositol-tetrakisphosphate 1-kinase 3 OS=Oryza sativa subsp. japonica OX=39947 GN=ITPK3 OsIPK1?? (OsMIK) PE=2 SV=1
LOC_Os02g15930	-1.129	1.16749e-110	Down	--
LOC_Os07g48180	1.44843	4.18075e-110	Up	sp|Q6S4P4|RF2B_ORYSJ Transcription factor RF2b OS=Oryza sativa subsp. japonica OX=39947 GN=RF2b PE=1 SV=2
LOC_Os09g16260	1.2869	3.75525e-108	Up	sp|Q6YW64|DRB4_ORYSJ Double-stranded RNA-binding protein 4 OS=Oryza sativa subsp. japonica OX=39947 GN=DRB4 PE=2 SV=1
LOC_Os04g43160	1.02129	6.18177e-108	Up	--
LOC_Os11g31380	1.77167	1.51009e-107	Up	sp|O22798|NAC41_ARATH NAC domain-containing protein 41 OS=Arabidopsis thaliana OX=3702 GN=NAC041 PE=2 SV=1
LOC_Os04g51070	1.30921	5.07901e-107	Up	sp|Q7X8R0|EAT1_ORYSJ Transcription factor EAT1 OS=Oryza sativa subsp. japonica OX=39947 GN=EAT1 PE=1 SV=2
LOC_Os06g14510	1.01056	1.03816e-106	Up	sp|P42863|G6PIB_ORYSJ Glucose-6-phosphate isomerase, cytosolic B OS=Oryza sativa subsp. japonica OX=39947 GN=Os06g0256500 PE=2 SV=2
LOC_Os08g28940	1.11888	1.82402e-106	Up	sp|Q9FLA2|FDL34_ARATH Putative F-box/FBD/LRR-repeat protein At5g44950 OS=Arabidopsis thaliana OX=3702 GN=At5g44950 PE=4 SV=1
LOC_Os09g27990	1.06735	6.36719e-106	Up	sp|Q94CK4|ANXD8_ARATH Annexin D8 OS=Arabidopsis thaliana OX=3702 GN=ANNAT8 PE=2 SV=2
LOC_Os07g41650	1.21812	2.36685e-103	Up	sp|Q9FM79|PME62_ARATH Pectinesterase QRT1 OS=Arabidopsis thaliana OX=3702 GN=QRT1 PE=2 SV=1
LOC_Os08g33820	1.64875	1.66117e-102	Up	sp|Q9SQL2|CB24_PEA Chlorophyll a-b binding protein P4, chloroplastic OS=Pisum sativum OX=3888 GN=lhcA-P4 PE=1 SV=1
LOC_Os01g71670	4.90756	4.24869e-102	Up	sp|P15737|E13B_HORVU Glucan endo-1,3-beta-glucosidase GII OS=Hordeum vulgare OX=4513 PE=1 SV=1
LOC_Os04g28250	-2.15365	1.99745e-101	Down	sp|A2XS65|CYT10_ORYSI Cysteine proteinase inhibitor 10 OS=Oryza sativa subsp. indica OX=39946 GN=OsI_014908 PE=3 SV=2
LOC_Os09g33780	1.46752	2.26691e-100	Up	--
LOC_Os01g39890	1.05445	4.62601e-100	Up	sp|Q9LI74|CHUP1_ARATH Protein CHUP1, chloroplastic OS=Arabidopsis thaliana OX=3702 GN=CHUP1 PE=1 SV=1
LOC_Os07g33780	1.32435	6.07913e-99	Up	sp|Q8GU86|AB43G_ORYSJ ABC transporter G family member 43 OS=Oryza sativa subsp. japonica OX=39947 GN=ABCG43 PE=2 SV=2
LOC_Os08g13920	1.2915	2.87476e-98	Up	sp|Q76BW5|XTH8_ORYSJ Xyloglucan endotransglycosylase/hydrolase protein 8 OS=Oryza sativa subsp. japonica OX=39947 GN=XTH8 PE=1 SV=1
LOC_Os11g31540	2.92347	4.31879e-98	Up	sp|Q6Z4U4|BAK1_ORYSJ LRR receptor kinase BAK1 OS=Oryza sativa subsp. japonica OX=39947 GN=BAK1 PE=1 SV=1
LOC_Os04g41620	5.69822	4.31879e-98	Up	sp|O04138|CHI4_ORYSJ Chitinase 4 OS=Oryza sativa subsp. japonica OX=39947 GN=Cht4 PE=2 SV=2
LOC_Os01g55600	1.07415	6.11044e-98	Up	sp|Q9M817|PTR6_ARATH Protein NRT1/ PTR FAMILY 1.2 OS=Arabidopsis thaliana OX=3702 GN=NPF1.2 PE=1 SV=1
LOC_Os06g10650	1.0108	6.30152e-98	Up	sp|Q0DX67|DSP2_ORYSJ Probable tyrosine-protein phosphatase DSP2 OS=Oryza sativa subsp. japonica OX=39947 GN=DSP2 PE=2 SV=2
LOC_Os12g28090	1.15448	6.88127e-98	Up	--
LOC_Os07g11150	1.83076	2.44416e-97	Up	--
LOC_Os03g04660	-1.02242	3.09646e-97	Down	sp|Q9FMY1|C86B1_ARATH Cytochrome P450 86B1 OS=Arabidopsis thaliana OX=3702 GN=CYP86B1 PE=2 SV=1
LOC_Os01g62740	3.8351	1.27873e-96	Up	--
LOC_Os02g09320	-1.19991	9.62597e-96	Down	sp|A3A871|C71Z6_ORYSJ Ent-isokaurene C2/C3-hydroxylase OS=Oryza sativa subsp. japonica OX=39947 GN=CYP71Z6 PE=1 SV=1
LOC_Os02g36680	1.02587	1.19417e-95	Up	--
LOC_Os06g37020	1.39526	1.67646e-95	Up	sp|F4K956|A70_ARATH Pathogen-associated molecular patterns-induced protein A70 OS=Arabidopsis thaliana OX=3702 GN=A70 PE=1 SV=1
LOC_Os06g48700	-2.03135	3.54753e-93	Down	sp|Q65XS5|BC10_ORYSJ Glycosyltransferase BC10 OS=Oryza sativa subsp. japonica OX=39947 GN=BC10 PE=1 SV=1
LOC_Os01g73960	1.05014	3.88583e-92	Up	sp|Q5JME8|DI195_ORYSJ Protein DEHYDRATION-INDUCED 19 homolog 5 OS=Oryza sativa subsp. japonica OX=39947 GN=DI19-5 PE=2 SV=1
LOC_Os01g28500	3.79023	5.92543e-92	Up	sp|Q00008|PRMS_MAIZE Pathogenesis-related protein PRMS OS=Zea mays OX=4577 GN=PRMS PE=2 SV=1
LOC_Os02g04325	1.86655	4.06878e-91	Up	--
LOC_Os06g03700	1.2198	1.63863e-89	Up	sp|O82485|OPT7_ARATH Oligopeptide transporter 7 OS=Arabidopsis thaliana OX=3702 GN=OPT7 PE=2 SV=1
LOC_Os02g37309	-1.20066	1.69041e-89	Down	--
LOC_Os02g36190	5.05067	2.3085e-89	Up	sp|Q6YV88|C71Z7_ORYSJ Ent-cassadiene hydroxylase OS=Oryza sativa subsp. japonica OX=39947 GN=CYP71Z7 PE=1 SV=1
LOC_Os04g47330	-3.34001	1.02612e-87	Down	--
LOC_Os11g31630	2.10637	2.42687e-87	Up	sp|Q9LZQ9|DEAH2_ARATH Probable pre-mRNA-splicing factor ATP-dependent RNA helicase DEAH2 OS=Arabidopsis thaliana OX=3702 GN=At3g62310 PE=2 SV=1
LOC_Os08g31950	1.04938	1.32778e-86	Up	sp|Q01I07|IBH1_ORYSI Transcription factor IBH1 OS=Oryza sativa subsp. indica OX=39946 GN=IBH1 PE=3 SV=1
LOC_Os06g39260	1.03107	4.15724e-86	Up	sp|Q9M9S6|UTR3_ARATH UDP-galactose/UDP-glucose transporter 3 OS=Arabidopsis thaliana OX=3702 GN=UTR3 PE=1 SV=1
LOC_Os09g24290	1.24284	1.47774e-84	Up	sp|Q500V5|AGDP1_ARATH Protein AGENET DOMAIN (AGD)-CONTAINING P1 OS=Arabidopsis thaliana OX=3702 GN=AGDP1 PE=1 SV=1
LOC_Os09g25490	1.53612	1.03252e-83	Up	sp|A2Z1C8|CESA9_ORYSI Cellulose synthase A catalytic subunit 9 [UDP-forming] OS=Oryza sativa subsp. indica OX=39946 GN=CESA9 PE=2 SV=1
LOC_Os02g38000	2.03537	6.32824e-83	Up	sp|P10978|POLX_TOBAC Retrovirus-related Pol polyprotein from transposon TNT 1-94 OS=Nicotiana tabacum OX=4097 PE=2 SV=1
LOC_Os05g47820	1.25551	9.98898e-83	Up	--
LOC_Os08g40590	1.29811	1.27479e-82	Up	sp|Q9SW00|ORP4B_ARATH Oxysterol-binding protein-related protein 4B OS=Arabidopsis thaliana OX=3702 GN=ORP4B PE=2 SV=2
LOC_Os04g06590	-1.78907	1.32421e-82	Down	--
LOC_Os12g36880	3.40993	2.90191e-82	Up	sp|P43177|BEV1D_BETPN Major pollen allergen Bet v 1-D/H OS=Betula pendula OX=3505 GN=BETV1D PE=1 SV=2
LOC_Os11g44870	2.12087	1.37251e-81	Up	sp|B6SJQ0|CNR13_MAIZE Cell number regulator 13 OS=Zea mays OX=4577 GN=CNR13 PE=2 SV=1
LOC_Os04g10060	4.59052	1.67002e-81	Up	sp|Q0JEZ8|KSL4_ORYSJ Syn-pimara-7,15-diene synthase OS=Oryza sativa subsp. japonica OX=39947 GN=KSL4 PE=1 SV=1
LOC_Os12g33120	4.00449	6.23927e-81	Up	--
LOC_Os02g37970	2.96657	1.8536e-80	Up	sp|Q9FH22|FLZ15_ARATH FCS-Like Zinc finger 15 OS=Arabidopsis thaliana OX=3702 GN=FLZ15 PE=1 SV=1
LOC_Os02g28580	1.39944	2.03048e-80	Up	--
LOC_Os10g39540	1.13191	4.01316e-80	Up	sp|P93006|P2C27_ARATH Probable protein phosphatase 2C 27 OS=Arabidopsis thaliana OX=3702 GN=PP2C27 PE=2 SV=1
LOC_Os07g47840	-1.54075	1.36694e-79	Down	--
LOC_Os03g10090	1.67999	3.71791e-79	Up	sp|Q8VZ80|PLT5_ARATH Polyol transporter 5 OS=Arabidopsis thaliana OX=3702 GN=PLT5 PE=1 SV=2
LOC_Os05g35400	2.77629	5.56362e-79	Up	sp|Q75HQ0|BIP4_ORYSJ Heat shock 70 kDa protein BIP4 OS=Oryza sativa subsp. japonica OX=39947 GN=BIP4 PE=2 SV=1
LOC_Os12g32940	1.49955	6.28068e-79	Up	sp|Q8VZ80|PLT5_ARATH Polyol transporter 5 OS=Arabidopsis thaliana OX=3702 GN=PLT5 PE=1 SV=2
LOC_Os12g38460	1.0866	7.08898e-79	Up	sp|Q8W034|RNP1_ARATH Heterogeneous nuclear ribonucleoprotein 1 OS=Arabidopsis thaliana OX=3702 GN=RNP1 PE=1 SV=1
LOC_Os12g32150	2.68046	2.17826e-77	Up	--
LOC_Os01g58240	2.47296	4.68982e-77	Up	sp|Q9ZSB1|SBT3A_ARATH Subtilisin-like protease SBT3.10 OS=Arabidopsis thaliana OX=3702 GN=SBT3.10 PE=3 SV=2
LOC_Os01g31690	1.51584	7.71562e-75	Up	sp|P27665|PSBO_WHEAT Oxygen-evolving enhancer protein 1, chloroplastic OS=Triticum aestivum OX=4565 GN=PSBO PE=2 SV=1
LOC_Os08g44360	-1.01689	8.8808e-75	Down	sp|Q39152|FACR1_ARATH Fatty acyl-CoA reductase 1 OS=Arabidopsis thaliana OX=3702 GN=FAR1 PE=1 SV=1
LOC_Os08g10244	3.2256	3.06538e-74	Up	sp|P31843|RRPO_OENBE RNA-directed DNA polymerase homolog OS=Oenothera berteroana OX=3950 PE=4 SV=1
LOC_Os08g36680	-1.42335	4.08674e-72	Down	sp|F4HUC4|ATCA5_ARATH Alpha carbonic anhydrase 5 OS=Arabidopsis thaliana OX=3702 GN=ACA5 PE=3 SV=1
LOC_Os10g17790	1.17814	5.93931e-72	Up	--
LOC_Os01g41710	1.74486	1.53385e-71	Up	sp|P12331|CB22_ORYSJ Chlorophyll a-b binding protein 2, chloroplastic OS=Oryza sativa subsp. japonica OX=39947 GN=CAB2R PE=2 SV=2
LOC_Os07g45100	1.12601	2.72452e-71	Up	--
LOC_Os07g17330	1.19296	1.18167e-70	Up	--
LOC_Os04g01740	-1.95411	3.93583e-70	Down	sp|Q08277|HSP82_MAIZE Heat shock protein 82 OS=Zea mays OX=4577 GN=HSP82 PE=3 SV=1
LOC_Os07g47120	1.39249	6.41791e-69	Up	sp|Q8VYW2|BAM9_ARATH Inactive beta-amylase 9 OS=Arabidopsis thaliana OX=3702 GN=BAM9 PE=2 SV=1
LOC_Os03g01320	1.11241	1.49028e-68	Up	sp|Q39176|ERLI1_ARATH Lipid transfer protein EARLI 1 OS=Arabidopsis thaliana OX=3702 GN=EARLI1 PE=1 SV=1
LOC_Os03g14180	-1.10667	2.39285e-68	Down	sp|Q10P60|HS26P_ORYSJ 26.7 kDa heat shock protein, chloroplastic OS=Oryza sativa subsp. japonica OX=39947 GN=HSP26.7 PE=2 SV=1
LOC_Os06g32020	-2.70606	6.04542e-68	Down	sp|P09617|THN5_HORVU Leaf-specific thionin OS=Hordeum vulgare OX=4513 GN=THI1.5 PE=2 SV=2
LOC_Os04g41560	1.2319	1.28486e-67	Up	sp|Q96288|BBX24_ARATH B-box zinc finger protein 24 OS=Arabidopsis thaliana OX=3702 GN=BBX24 PE=1 SV=1
LOC_Os09g12150	2.01795	2.63495e-67	Up	sp|Q9LDE3|FBK9_ARATH F-box/kelch-repeat protein At1g23390 OS=Arabidopsis thaliana OX=3702 GN=At1g23390 PE=2 SV=1
LOC_Os10g39680	3.10329	2.72619e-67	Up	sp|Q7XCK6|CHI8_ORYSJ Chitinase 8 OS=Oryza sativa subsp. japonica OX=39947 GN=Cht8 PE=2 SV=1
LOC_Os11g32890	-1.00865	3.34349e-67	Down	--
LOC_Os07g45060	1.1502	5.08032e-67	Up	sp|Q84MC0|UGPI4_ARATH Uncharacterized GPI-anchored protein At3g06035 OS=Arabidopsis thaliana OX=3702 GN=At3g06035 PE=2 SV=1
LOC_Os04g44580	1.43399	3.86662e-66	Up	--
LOC_Os05g47730	-2.84496	5.6498e-64	Down	sp|A2XBN5|NLTPX_ORYSI Non-specific lipid-transfer protein 2 OS=Oryza sativa subsp. indica OX=39946 GN=LTP-2 PE=3 SV=2
LOC_Os01g71970	1.08589	8.33669e-64	Up	sp|Q9LPR8|SCL3_ARATH Scarecrow-like protein 3 OS=Arabidopsis thaliana OX=3702 GN=SCL3 PE=1 SV=1
LOC_Os09g36700	2.44208	1.22261e-63	Up	sp|P42813|RNS1_ARATH Ribonuclease 1 OS=Arabidopsis thaliana OX=3702 GN=RNS1 PE=1 SV=1
LOC_Os06g35165	1.98257	1.38502e-63	Up	--
LOC_Os10g02490	2.27949	1.63431e-63	Up	sp|Q10PE7|DMAS1_ORYSJ Deoxymugineic acid synthase 1 OS=Oryza sativa subsp. japonica OX=39947 GN=DMAS1 PE=1 SV=1
LOC_Os12g07180	3.14281	3.31683e-63	Up	sp|Q9FHE1|GSTT3_ARATH Glutathione S-transferase T3 OS=Arabidopsis thaliana OX=3702 GN=GSTT3 PE=2 SV=1
LOC_Os08g42400	1.90658	7.0544e-63	Up	sp|Q9ZNU2|NAC18_ARATH NAC domain-containing protein 18 OS=Arabidopsis thaliana OX=3702 GN=NAC018 PE=2 SV=1
LOC_Os03g18150	-1.35241	1.29897e-62	Down	sp|Q10MX1|P2C32_ORYSJ Probable protein phosphatase 2C 32 OS=Oryza sativa subsp. japonica OX=39947 GN=Os03g0292100 PE=2 SV=1
LOC_Os08g06100	1.06895	6.7246e-62	Up	sp|Q6ZD89|OMT1_ORYSJ Flavone 3'-O-methyltransferase 1 OS=Oryza sativa subsp. japonica OX=39947 GN=COMT PE=1 SV=1
LOC_Os11g09590	-3.53897	8.31972e-62	Down	sp|Q9LZZ2|FBD12_ARATH Putative FBD-associated F-box protein At3g60710 OS=Arabidopsis thaliana OX=3702 GN=At3g60710 PE=4 SV=1
LOC_Os07g38960	1.36707	2.11998e-61	Up	sp|P10708|CB12_SOLLC Chlorophyll a-b binding protein 7, chloroplastic OS=Solanum lycopersicum OX=4081 GN=CAB7 PE=3 SV=1
LOC_Os01g13280	1.08342	1.64873e-59	Up	sp|Q9LUQ5|UBC25_ARATH Probable ubiquitin-conjugating enzyme E2 25 OS=Arabidopsis thaliana OX=3702 GN=UBC25 PE=2 SV=1
LOC_Os01g41810	2.34979	1.26643e-58	Up	sp|W8JWW3|CA225_CATRO Cytochrome P450 72A225 OS=Catharanthus roseus OX=4058 GN=CYP72A225 PE=2 SV=1
LOC_Os01g54700	1.00049	1.84892e-58	Up	sp|Q9LV48|PERK1_ARATH Proline-rich receptor-like protein kinase PERK1 OS=Arabidopsis thaliana OX=3702 GN=PERK1 PE=1 SV=1
LOC_Os01g72530	-2.25737	1.93543e-58	Down	sp|Q8RYK0|CML31_ORYSJ Probable calcium-binding protein CML31 OS=Oryza sativa subsp. japonica OX=39947 GN=CML31 PE=2 SV=1
LOC_Os12g07310	2.34932	6.0607e-58	Up	sp|Q39962|CBPR_HEVBR Citrate-binding protein OS=Hevea brasiliensis OX=3981 GN=CBP PE=1 SV=1
LOC_Os06g40020	1.23145	7.60677e-58	Up	sp|Q0DB53|RH52A_ORYSJ DEAD-box ATP-dependent RNA helicase 52A OS=Oryza sativa subsp. japonica OX=39947 GN=Os06g0602400 PE=2 SV=2
LOC_Os03g61160	-1.1798	1.89278e-57	Down	--
LOC_Os12g16880	1.59177	1.9065e-57	Up	sp|P20698|PRO28_ORYSJ Prolamin PPROL 17D OS=Oryza sativa subsp. japonica OX=39947 GN=Os12g0269200 PE=2 SV=2
LOC_Os07g37240	1.45716	9.66235e-57	Up	sp|Q07473|CB4A_ARATH Chlorophyll a-b binding protein CP29.1, chloroplastic OS=Arabidopsis thaliana OX=3702 GN=LHCB4.1 PE=1 SV=1
LOC_Os01g65650	1.39412	6.30656e-56	Up	sp|Q9C7T7|CEPR2_ARATH Receptor protein-tyrosine kinase CEPR2 OS=Arabidopsis thaliana OX=3702 GN=CEPR2 PE=1 SV=1
LOC_Os01g39000	1.54911	8.87044e-56	Up	--
LOC_Os10g14180	1.13589	1.55742e-55	Up	--
LOC_Os07g29960	2.59358	1.61179e-55	Up	sp|Q7XU38|C87A3_ORYSJ Cytochrome P450 87A3 OS=Oryza sativa subsp. japonica OX=39947 GN=CYP87A3 PE=2 SV=3
LOC_Os01g48390	1.08043	2.05871e-55	Up	sp|C0LGQ4|MDIS2_ARATH Protein MALE DISCOVERER 2 OS=Arabidopsis thaliana OX=3702 GN=MDIS2 PE=1 SV=1
LOC_Os03g04080	-1.16293	5.2443e-55	Down	--
LOC_Os10g25674	1.11993	7.08572e-55	Up	sp|Q949G5|MOB1A_MEDSF MOB kinase activator-like 1A OS=Medicago sativa subsp. falcata OX=3878 GN=MOB1-A PE=2 SV=2
LOC_Os01g20780	1.14725	1.72505e-54	Up	--
LOC_Os07g25970	1.7665	2.09207e-54	Up	--
LOC_Os04g32320	-2.06214	1.12931e-53	Down	sp|Q9FLM1|GDPD2_ARATH Glycerophosphodiester phosphodiesterase GDPD2 OS=Arabidopsis thaliana OX=3702 GN=GDPD2 PE=2 SV=1
LOC_Os01g09220	-1.75805	1.73777e-53	Down	sp|Q94K49|ALP1_ARATH Protein ANTAGONIST OF LIKE HETEROCHROMATIN PROTEIN 1 OS=Arabidopsis thaliana OX=3702 GN=ALP1 PE=1 SV=1
LOC_Os03g45480	1.93784	3.4118e-53	Up	--
LOC_Os04g42520	1.22423	4.09894e-52	Up	sp|Q42563|APT2_ARATH Adenine phosphoribosyltransferase 2 OS=Arabidopsis thaliana OX=3702 GN=APT2 PE=1 SV=1
LOC_Os01g22352	1.53969	5.0376e-52	Up	sp|A5H8G4|PER1_MAIZE Peroxidase 1 OS=Zea mays OX=4577 GN=PER1 PE=1 SV=1
LOC_Os01g72420	1.21505	6.37854e-52	Up	--
LOC_Os09g28400	-1.09551	1.01986e-51	Down	sp|P27932|AMY3A_ORYSJ Alpha-amylase isozyme 3A OS=Oryza sativa subsp. japonica OX=39947 GN=AMY1.2 PE=2 SV=2
LOC_Os02g10780	-1.31969	2.23984e-51	Down	sp|Q6Z784|SPX2_ORYSJ SPX domain-containing protein 2 OS=Oryza sativa subsp. japonica OX=39947 GN=SPX2 PE=1 SV=1
LOC_Os08g01530	1.14608	6.2681e-51	Up	sp|Q9STW3|DMP3_ARATH Protein DMP3 OS=Arabidopsis thaliana OX=3702 GN=DMP3 PE=2 SV=1
LOC_Os07g33480	1.73711	2.89417e-50	Up	sp|F6H9N6|C7A15_VITVI Beta-amyrin 28-monooxygenase OS=Vitis vinifera OX=29760 GN=CYP716A15 PE=1 SV=1
LOC_Os11g34624	5.3052	9.49845e-50	Up	sp|Q0D5R3|CRK6_ORYSJ Cysteine-rich receptor-like protein kinase 6 OS=Oryza sativa subsp. japonica OX=39947 GN=CRK6 PE=1 SV=1
LOC_Os04g41250	1.19588	3.53883e-49	Up	sp|Q9C7G1|PUB45_ARATH U-box domain-containing protein 45 OS=Arabidopsis thaliana OX=3702 GN=PUB45 PE=1 SV=1
LOC_Os04g57130	3.5952	6.33907e-49	Up	sp|Q9FIG7|DIR2_ARATH Dirigent protein 2 OS=Arabidopsis thaliana OX=3702 GN=DIR2 PE=2 SV=1
LOC_Os11g14570	1.28933	1.05491e-48	Up	sp|Q8LPS2|ACD6_ARATH Protein ACCELERATED CELL DEATH 6 OS=Arabidopsis thaliana OX=3702 GN=ACD6 PE=1 SV=1
LOC_Os06g44310	1.06129	1.76693e-48	Up	sp|Q8S8Q6|TET8_ARATH Tetraspanin-8 OS=Arabidopsis thaliana OX=3702 GN=TET8 PE=2 SV=1
LOC_Os01g38229	2.32594	2.15596e-48	Up	sp|Q43207|FKB70_WHEAT 70 kDa peptidyl-prolyl isomerase OS=Triticum aestivum OX=4565 GN=FKBP70 PE=1 SV=1
LOC_Os02g19420	-1.75405	3.32311e-48	Down	--
LOC_Os08g10500	-1.32127	3.73515e-48	Down	--
LOC_Os04g57650	1.00988	8.13491e-48	Up	--
LOC_Os07g01460	2.04755	8.56447e-48	Up	sp|Q8LF09|FDL23_ARATH F-box/FBD/LRR-repeat protein At4g00160 OS=Arabidopsis thaliana OX=3702 GN=At4g00160 PE=2 SV=2
LOC_Os05g50920	1.1463	1.70031e-47	Up	sp|Q8L4X4|GAT2_ARATH Probable GABA transporter 2 OS=Arabidopsis thaliana OX=3702 GN=At5g41800 PE=1 SV=1
LOC_Os10g18340	2.10237	1.74398e-47	Up	sp|Q9ZQ80|NDRP1_ARATH Nodulin-related protein 1 OS=Arabidopsis thaliana OX=3702 GN=NRP1 PE=1 SV=1
LOC_Os07g37040	1.32664	2.32151e-47	Up	--
LOC_Os03g53020	-1.9317	4.19811e-47	Down	sp|Q75KV9|BH148_ORYSJ Transcription factor BHLH148 OS=Oryza sativa subsp. japonica OX=39947 GN=BHLH148 PE=1 SV=1
LOC_Os06g40120	-1.46356	4.47597e-47	Down	sp|Q69XJ0|SPX1_ORYSJ SPX domain-containing protein 1 OS=Oryza sativa subsp. japonica OX=39947 GN=SPX1 PE=1 SV=1
LOC_Os06g05120	1.39582	6.65456e-47	Up	--
LOC_Os03g13870	1.6692	7.5262e-47	Up	--
LOC_Os02g37010	1.25595	8.53948e-47	Up	sp|Q9FF12|GSXL9_ARATH Flavin-containing monooxygenase FMO GS-OX-like 9 OS=Arabidopsis thaliana OX=3702 GN=At5g07800 PE=2 SV=1
LOC_Os07g06620	1.53328	1.40255e-46	Up	sp|Q7XIM7|YAB1_ORYSJ Protein YABBY 1 OS=Oryza sativa subsp. japonica OX=39947 GN=YAB1 PE=2 SV=1
LOC_Os08g04130	1.06298	2.80915e-46	Up	sp|Q9SAL0|RGLG4_ARATH E3 ubiquitin-protein ligase RGLG4 OS=Arabidopsis thaliana OX=3702 GN=RGLG4 PE=1 SV=1
LOC_Os02g32504	1.57042	3.54456e-46	Up	--
LOC_Os07g06830	1.31769	3.65581e-46	Up	sp|Q9FG13|CXE15_ARATH Probable carboxylesterase 15 OS=Arabidopsis thaliana OX=3702 GN=CXE15 PE=2 SV=1
LOC_Os07g39970	1.43564	5.24736e-46	Up	sp|O22533|ZAT6_ARATH Zinc finger protein ZAT6 OS=Arabidopsis thaliana OX=3702 GN=ZAT6 PE=2 SV=1
LOC_Os02g53200	-1.12993	7.39075e-46	Down	sp|Q8VYE5|E1312_ARATH Glucan endo-1,3-beta-glucosidase 12 OS=Arabidopsis thaliana OX=3702 GN=At4g29360 PE=2 SV=1
LOC_Os09g36210	1.61912	8.08494e-46	Up	sp|Q9FI03|NHL26_ARATH NDR1/HIN1-like protein 26 OS=Arabidopsis thaliana OX=3702 GN=NHL26 PE=2 SV=1
LOC_Os04g57880	1.1954	1.86214e-45	Up	sp|Q9FMX6|DJC76_ARATH Chaperone protein dnaJ C76, chloroplastic OS=Arabidopsis thaliana OX=3702 GN=DJC76 PE=2 SV=1
LOC_Os07g38840	1.23916	1.99508e-45	Up	--
LOC_Os03g61670	1.16491	3.27085e-45	Up	sp|Q9SLY8|CALR_ORYSJ Calreticulin OS=Oryza sativa subsp. japonica OX=39947 GN=CRO1 PE=1 SV=2
LOC_Os03g10620	1.05532	4.07871e-45	Up	sp|Q10QA5|D14_ORYSJ Strigolactone esterase D14 OS=Oryza sativa subsp. japonica OX=39947 GN=D14 PE=1 SV=1
LOC_Os11g08050	1.55063	5.16556e-45	Up	sp|Q9C7A2|ITN1_ARATH Ankyrin repeat-containing protein ITN1 OS=Arabidopsis thaliana OX=3702 GN=ITN1 PE=1 SV=1
LOC_Os01g06240	-1.06379	1.01665e-44	Down	sp|O64477|Y2913_ARATH G-type lectin S-receptor-like serine/threonine-protein kinase At2g19130 OS=Arabidopsis thaliana OX=3702 GN=At2g19130 PE=2 SV=1
LOC_Os02g18000	1.15104	1.42237e-44	Up	sp|Q7XA42|RGA1_SOLBU Putative disease resistance protein RGA1 OS=Solanum bulbocastanum OX=147425 GN=RGA1 PE=2 SV=2
LOC_Os10g19912	1.48983	2.09516e-44	Up	--
LOC_Os06g01850	1.49082	2.12223e-44	Up	sp|P41344|FENR1_ORYSJ Ferredoxin--NADP reductase, leaf isozyme 1, chloroplastic OS=Oryza sativa subsp. japonica OX=39947 GN=LFNR1 PE=1 SV=1
LOC_Os08g01380	1.25072	2.64546e-44	Up	sp|A2YQD9|FER1_ORYSI Ferredoxin-1, chloroplastic OS=Oryza sativa subsp. indica OX=39946 GN=ADI1 PE=1 SV=1
LOC_Os08g08980	2.12746	5.96494e-44	Up	sp|Q6YZZ6|GL84_ORYSJ Germin-like protein 8-4 OS=Oryza sativa subsp. japonica OX=39947 GN=GER1 PE=2 SV=1
LOC_Os05g27910	4.14817	7.34402e-44	Up	--
LOC_Os01g54350	1.02444	8.86646e-44	Up	sp|Q2MHE4|HT1_ARATH Serine/threonine/tyrosine-protein kinase HT1 OS=Arabidopsis thaliana OX=3702 GN=HT1 PE=1 SV=1
LOC_Os04g36800	1.14283	1.19483e-43	Up	sp|P23902|KASC1_HORVU 3-oxoacyl-[acyl-carrier-protein] synthase I, chloroplastic OS=Hordeum vulgare OX=4513 GN=KAS12 PE=1 SV=1
LOC_Os03g58600	1.25016	1.46409e-43	Up	sp|Q851R2|MEL1_ORYSJ Protein argonaute MEL1 OS=Oryza sativa subsp. japonica OX=39947 GN=MEL1 PE=2 SV=1
LOC_Os02g34370	1.24444	9.68855e-43	Up	--
LOC_Os03g55540	-1.9361	1.06967e-42	Down	sp|Q42430|ZFP1_WHEAT Zinc finger protein 1 OS=Triticum aestivum OX=4565 PE=2 SV=1
LOC_Os03g02874	-2.09566	1.1251e-42	Down	--
LOC_Os06g04240	-2.07689	1.28506e-42	Down	--
LOC_Os07g18230	2.19251	1.50024e-42	Up	sp|Q7XUN6|SIT2_ORYSJ L-type lectin-domain containing receptor kinase SIT2 OS=Oryza sativa subsp. japonica OX=39947 GN=SIT2 PE=2 SV=2
LOC_Os09g17560	3.02577	1.81807e-42	Up	sp|Q6EPG8|ASMT1_ORYSJ Acetylserotonin O-methyltransferase 1 OS=Oryza sativa subsp. japonica OX=39947 GN=ASMT1 PE=1 SV=1
LOC_Os06g11730	1.17191	4.03901e-42	Up	sp|Q9M1S3|ARP1_ARATH Probable RNA-binding protein ARP1 OS=Arabidopsis thaliana OX=3702 GN=ARP1 PE=2 SV=1
LOC_Os10g22990	1.69159	4.51438e-42	Up	sp|Q9ZPE7|EXO_ARATH Protein EXORDIUM OS=Arabidopsis thaliana OX=3702 GN=EXO PE=2 SV=1
LOC_Os07g48450	-1.76212	4.70961e-42	Down	sp|Q8GY42|NAC25_ARATH NAC transcription factor 25 OS=Arabidopsis thaliana OX=3702 GN=NAC025 PE=2 SV=1
LOC_Os02g01340	1.17818	4.84206e-42	Up	sp|Q6ZFJ3|FENR2_ORYSJ Ferredoxin--NADP reductase, leaf isozyme 2, chloroplastic OS=Oryza sativa subsp. japonica OX=39947 GN=LFNR2 PE=1 SV=1
LOC_Os12g43440	4.77971	8.58393e-42	Up	sp|P31110|TLP_ORYSJ Thaumatin-like protein OS=Oryza sativa subsp. japonica OX=39947 GN=Os12g0628600 PE=1 SV=1
LOC_Os06g01210	1.18927	1.11746e-41	Up	sp|A2Y886|PLAS_ORYSI Plastocyanin, chloroplastic OS=Oryza sativa subsp. indica OX=39946 GN=PETE PE=2 SV=1
LOC_Os06g04230	-1.98824	1.47842e-41	Down	--
LOC_Os01g68300	2.55436	1.91395e-41	Up	--
LOC_Os05g31720	2.56913	2.27737e-41	Up	sp|Q8L7A4|AGD11_ARATH Probable ADP-ribosylation factor GTPase-activating protein AGD11 OS=Arabidopsis thaliana OX=3702 GN=AGD11 PE=2 SV=1
LOC_Os05g09500	1.03777	6.36351e-41	Up	sp|Q1WM16|HXK7_ORYSJ Hexokinase-7 OS=Oryza sativa subsp. japonica OX=39947 GN=HXK7 PE=2 SV=2
LOC_Os03g30530	-1.17795	7.07837e-41	Down	sp|Q9LF24|LNG1_ARATH Protein LONGIFOLIA 1 OS=Arabidopsis thaliana OX=3702 GN=LNG1 PE=1 SV=1
LOC_Os01g69100	1.12347	1.31531e-40	Up	sp|Q9LK32|Y3721_ARATH Uncharacterized protein At3g27210 OS=Arabidopsis thaliana OX=3702 GN=Y-2 PE=1 SV=1
LOC_Os02g54140	-1.33963	2.89679e-40	Down	sp|Q6K7E9|HS186_ORYSJ 18.6 kDa class III heat shock protein OS=Oryza sativa subsp. japonica OX=39947 GN=HSP18.6 PE=2 SV=1
LOC_Os10g23180	1.86972	2.90559e-40	Up	sp|Q9AXH9|KAO1_HORVU Ent-kaurenoic acid oxidase 1 OS=Hordeum vulgare OX=4513 GN=KAO1 PE=1 SV=1
LOC_Os01g49330	1.26541	3.67969e-40	Up	sp|Q93YQ3|PURU1_ARATH Formyltetrahydrofolate deformylase 1, mitochondrial OS=Arabidopsis thaliana OX=3702 GN=PURU1 PE=1 SV=1
LOC_Os05g43930	1.51529	4.96809e-40	Up	sp|P47917|ZRP4_MAIZE O-methyltransferase ZRP4 OS=Zea mays OX=4577 GN=ZRP4 PE=2 SV=1
LOC_Os02g37000	1.69975	6.11273e-40	Up	sp|O04331|PHB3_ARATH Prohibitin-3, mitochondrial OS=Arabidopsis thaliana OX=3702 GN=PHB3 PE=1 SV=1
LOC_Os08g04450	1.17117	6.83008e-40	Up	sp|Q9LPZ1|MORF9_ARATH Multiple organellar RNA editing factor 9, chloroplastic OS=Arabidopsis thaliana OX=3702 GN=MORF9 PE=1 SV=1
LOC_Os01g04870	1.13752	1.75276e-39	Up	sp|Q84KJ3|DDB2_ORYSJ DNA damage-binding protein 2 OS=Oryza sativa subsp. japonica OX=39947 GN=DDB2 PE=1 SV=1
LOC_Os10g40550	1.55154	1.88832e-39	Up	sp|Q9FWQ2|TPP2_ORYSJ Probable trehalose-phosphate phosphatase 2 OS=Oryza sativa subsp. japonica OX=39947 GN=TPP2 PE=1 SV=1
LOC_Os01g64470	-2.8803	2.50285e-39	Down	sp|Q9SJ52|NHL10_ARATH NDR1/HIN1-like protein 10 OS=Arabidopsis thaliana OX=3702 GN=NHL10 PE=2 SV=1
LOC_Os04g10160	3.84321	2.77917e-39	Up	sp|Q7X7X4|C99A2_ORYSJ Cytochrome P450 99A2 OS=Oryza sativa subsp. japonica OX=39947 GN=CYP99A2 PE=2 SV=2
LOC_Os01g58290	1.85715	3.14099e-39	Up	sp|Q9MAP7|SBT35_ARATH Subtilisin-like protease SBT3.5 OS=Arabidopsis thaliana OX=3702 GN=SBT3.5 PE=1 SV=1
LOC_Os10g33350	1.00285	4.41903e-39	Up	--
LOC_Os04g41680	6.01528	5.30667e-39	Up	sp|Q7Y1Z0|CHI5_ORYSJ Chitinase 5 OS=Oryza sativa subsp. japonica OX=39947 GN=Cht5 PE=2 SV=1
LOC_Os03g56670	1.59442	8.54216e-39	Up	sp|P13192|PSAF_HORVU Photosystem I reaction center subunit III, chloroplastic OS=Hordeum vulgare OX=4513 GN=PSAF PE=1 SV=2
LOC_Os02g42310	-1.68295	1.0239e-38	Down	sp|Q0WPR4|SCP34_ARATH Serine carboxypeptidase-like 34 OS=Arabidopsis thaliana OX=3702 GN=SCPL34 PE=2 SV=2
LOC_Os02g36924	1.0545	1.29602e-38	Up	sp|Q6EP49|MAD27_ORYSJ MADS-box transcription factor 27 OS=Oryza sativa subsp. japonica OX=39947 GN=MADS27 PE=2 SV=2
LOC_Os12g19470	1.23973	1.70875e-38	Up	sp|A2Y205|RBS1_ORYSI Ribulose bisphosphate carboxylase small chain, chloroplastic OS=Oryza sativa subsp. indica OX=39946 GN=RBCS PE=2 SV=2
LOC_Os07g25430	1.28562	1.84447e-38	Up	sp|P13194|PSAE_HORVU Photosystem I reaction center subunit IV, chloroplastic OS=Hordeum vulgare OX=4513 GN=PSAE PE=1 SV=2
LOC_Os02g36070	3.90853	2.1753e-38	Up	sp|Q6YTF1|C76M8_ORYSJ Oryzalexin D synthase OS=Oryza sativa subsp. japonica OX=39947 GN=CYP76M8 PE=1 SV=1
LOC_Os12g41790	1.10292	3.0143e-38	Up	--
LOC_Os01g11940	1.77616	3.03108e-38	Up	sp|Q8VWH2|RFT1_ORYSJ Protein RICE FLOWERING LOCUS T 1 OS=Oryza sativa subsp. japonica OX=39947 GN=RFT1 PE=1 SV=1
LOC_Os02g53320	1.16991	4.58527e-38	Up	sp|Q8VYN9|PHO32_ARATH Universal stress protein PHOS32 OS=Arabidopsis thaliana OX=3702 GN=PHOS32 PE=1 SV=1
LOC_Os04g56430	-2.98401	6.98762e-38	Down	sp|Q0D5R3|CRK6_ORYSJ Cysteine-rich receptor-like protein kinase 6 OS=Oryza sativa subsp. japonica OX=39947 GN=CRK6 PE=1 SV=1
LOC_Os07g37030	1.25376	8.08861e-38	Up	sp|Q69S39|UCRIA_ORYSJ Cytochrome b6-f complex iron-sulfur subunit, chloroplastic OS=Oryza sativa subsp. japonica OX=39947 GN=petC PE=1 SV=1
LOC_Os07g43240	1.2902	8.68392e-38	Up	sp|Q6H4D6|SKP5_ORYSJ SKP1-like protein 5 OS=Oryza sativa subsp. japonica OX=39947 GN=SKP5 PE=1 SV=1
LOC_Os05g32720	2.08072	1.11865e-37	Up	sp|Q9SY14|CSCL2_ARATH CSC1-like protein At4g02900 OS=Arabidopsis thaliana OX=3702 GN=At4g02900 PE=3 SV=1
LOC_Os03g20120	-1.49015	1.16476e-37	Down	sp|O22893|GOLS1_ARATH Galactinol synthase 1 OS=Arabidopsis thaliana OX=3702 GN=GOLS1 PE=1 SV=1
LOC_Os01g55950	1.39025	1.65226e-37	Up	--
LOC_Os10g01660	1.7468	2.27926e-37	Up	sp|Q7G4G7|AT1_ORYSJ Acyl transferase 1 OS=Oryza sativa subsp. japonica OX=39947 GN=AT1 PE=2 SV=1
LOC_Os03g56160	1.41742	5.96351e-37	Up	sp|Q7XUN6|SIT2_ORYSJ L-type lectin-domain containing receptor kinase SIT2 OS=Oryza sativa subsp. japonica OX=39947 GN=SIT2 PE=2 SV=2
LOC_Os01g26039	-1.20287	3.4644e-36	Down	sp|Q9ZVN2|Y1457_ARATH Acyltransferase-like protein At1g54570, chloroplastic OS=Arabidopsis thaliana OX=3702 GN=At1g54570 PE=1 SV=1
LOC_Os06g50400	-1.85984	6.13204e-36	Down	sp|Q4PR39|EXP29_ORYSJ Expansin-A29 OS=Oryza sativa subsp. japonica OX=39947 GN=EXPA29 PE=2 SV=2
LOC_Os07g45570	2.50171	1.11557e-35	Up	--
LOC_Os05g33630	1.61016	2.42085e-35	Up	sp|Q6ZJ05|URH1_ORYSJ Probable uridine nucleosidase 1 OS=Oryza sativa subsp. japonica OX=39947 GN=URH1 PE=2 SV=1
LOC_Os11g31850	3.2351	1.12958e-34	Up	--
LOC_Os04g39880	2.15297	5.13242e-34	Up	sp|Q7XKV4|BGL12_ORYSJ Beta-glucosidase 12 OS=Oryza sativa subsp. japonica OX=39947 GN=BGLU12 PE=1 SV=2
LOC_Os10g41838	4.79795	7.13488e-34	Up	sp|Q9FJJ4|FB298_ARATH F-box protein At5g62510 OS=Arabidopsis thaliana OX=3702 GN=At5g62510 PE=2 SV=1
LOC_Os05g40330	1.02191	7.66509e-34	Up	sp|Q9LZN2|PILS6_ARATH Protein PIN-LIKES 6 OS=Arabidopsis thaliana OX=3702 GN=PILS6 PE=2 SV=1
LOC_Os04g42120	-1.70254	8.35766e-34	Down	sp|A7UL74|CTF7_ARATH Protein CHROMOSOME TRANSMISSION FIDELITY 7 OS=Arabidopsis thaliana OX=3702 GN=CTF7 PE=1 SV=1
LOC_Os06g28050	1.71177	1.10306e-33	Up	sp|Q9FMX6|DJC76_ARATH Chaperone protein dnaJ C76, chloroplastic OS=Arabidopsis thaliana OX=3702 GN=DJC76 PE=2 SV=1
LOC_Os04g55420	1.78034	1.65317e-33	Up	sp|Q70CT4|RLP8_ARATH Receptor-like protein 8 OS=Arabidopsis thaliana OX=3702 GN=RLP8 PE=2 SV=1
LOC_Os11g10980	1.23137	1.96639e-33	Up	sp|B8BJ39|KPYC1_ORYSI Pyruvate kinase 1, cytosolic OS=Oryza sativa subsp. indica OX=39946 GN=OsI_35105 PE=3 SV=1
LOC_Os01g55630	1.83399	2.9087e-33	Up	sp|Q09151|GLUA3_ORYSJ Glutelin type-A 3 OS=Oryza sativa subsp. japonica OX=39947 GN=GLUA3 PE=2 SV=2
LOC_Os03g50960	-2.98677	3.27191e-33	Down	sp|Q01595|CCDP_MAIZE Cortical cell-delineating protein OS=Zea mays OX=4577 PE=2 SV=1
LOC_Os07g37550	1.31389	3.35298e-33	Up	sp|P27523|CB23_HORVU Chlorophyll a-b binding protein of LHCII type III, chloroplastic OS=Hordeum vulgare OX=4513 GN=LHBC PE=2 SV=1
LOC_Os04g24220	5.15048	3.49948e-33	Up	sp|Q9LMN7|WAK5_ARATH Wall-associated receptor kinase 5 OS=Arabidopsis thaliana OX=3702 GN=WAK5 PE=2 SV=1
LOC_Os02g02210	-2.65429	3.66773e-33	Down	sp|Q6ZH29|GATP4_ORYSJ Probable gamma-aminobutyrate transaminase 4 OS=Oryza sativa subsp. japonica OX=39947 GN=GABA-T PE=2 SV=1
LOC_Os07g10030	1.01461	9.29597e-33	Up	--
LOC_Os11g27730	1.70494	9.3701e-33	Up	sp|Q43257|C71C4_MAIZE indole-2-monooxygenase OS=Zea mays OX=4577 GN=CYP71C4 PE=1 SV=1
LOC_Os01g52230	-1.78658	1.00242e-32	Down	sp|Q67YC0|PPSP1_ARATH Inorganic pyrophosphatase 1 OS=Arabidopsis thaliana OX=3702 GN=PS2 PE=1 SV=1
LOC_Os03g22510	-4.19368	1.86339e-32	Down	--
LOC_Os06g32160	-1.06805	2.62464e-32	Down	sp|P09617|THN5_HORVU Leaf-specific thionin OS=Hordeum vulgare OX=4513 GN=THI1.5 PE=2 SV=2
LOC_Os12g15780	1.91713	3.20193e-32	Up	sp|P31843|RRPO_OENBE RNA-directed DNA polymerase homolog OS=Oenothera berteroana OX=3950 PE=4 SV=1
LOC_Os01g60770	1.01596	4.20421e-32	Up	sp|Q40636|EXPA2_ORYSJ Expansin-A2 OS=Oryza sativa subsp. japonica OX=39947 GN=EXPA2 PE=2 SV=2
LOC_Os01g28790	-2.47726	4.43388e-32	Down	--
LOC_Os12g11620	4.61814	4.73253e-32	Up	--
LOC_Os03g52910	1.23163	9.41284e-32	Up	--
LOC_Os01g41820	2.5092	1.31006e-31	Up	sp|Q9LUC5|C7A15_ARATH Cytochrome P450 72A15 OS=Arabidopsis thaliana OX=3702 GN=CYP72A15 PE=2 SV=1
LOC_Os03g46090	1.10785	1.56738e-31	Up	sp|Q0WQ41|IP5P7_ARATH Type IV inositol polyphosphate 5-phosphatase 7 OS=Arabidopsis thaliana OX=3702 GN=IP5P7 PE=1 SV=1
LOC_Os10g14920	1.29973	1.77259e-31	Up	sp|Q9SUF1|WTR31_ARATH WAT1-related protein At4g08290 OS=Arabidopsis thaliana OX=3702 GN=At4g08290 PE=2 SV=1
LOC_Os04g02490	6.17501	3.22073e-31	Up	--
LOC_Os11g10470	-2.01602	4.13101e-31	Down	--
LOC_Os06g45890	-1.27194	4.90153e-31	Down	sp|Q700D9|MYBF_ARATH Putative Myb family transcription factor At1g14600 OS=Arabidopsis thaliana OX=3702 GN=At1g14600 PE=2 SV=2
LOC_Os01g28744	1.88801	6.49032e-31	Up	--
LOC_Os04g26920	1.00043	8.73241e-31	Up	sp|Q7XT99|AKR2_ORYSJ Probable aldo-keto reductase 2 OS=Oryza sativa subsp. japonica OX=39947 GN=Os04g0338000 PE=2 SV=2
LOC_Os11g28910	2.50612	9.58495e-31	Up	--
LOC_Os03g09970	-2.89814	1.54001e-30	Down	sp|Q9MAX3|SUT12_ARATH Sulfate transporter 1.2 OS=Arabidopsis thaliana OX=3702 GN=SULTR1;2 PE=1 SV=1
LOC_Os04g53810	1.47931	3.61944e-30	Up	sp|D7U6G6|ANRPN_VITVI Anthocyanidin reductase ((2S)-flavan-3-ol-forming) OS=Vitis vinifera OX=29760 GN=ANR PE=3 SV=1
LOC_Os01g18110	1.64238	4.62016e-30	Up	sp|Q6K9A2|CCR1_ORYSJ Cinnamoyl-CoA reductase 1 OS=Oryza sativa subsp. japonica OX=39947 GN=CCR1 PE=1 SV=1
LOC_Os01g29830	-1.00031	4.93733e-30	Down	--
LOC_Os03g24910	1.15584	5.92798e-30	Up	--
LOC_Os04g01470	5.1622	6.46476e-30	Up	sp|Q7XXI9|OMTL2_ORYSJ Caffeate O-methyltransferase-like protein 2 OS=Oryza sativa subsp. japonica OX=39947 GN=COMTL2 PE=2 SV=2
LOC_Os03g16090	1.1228	1.40447e-29	Up	sp|Q0WSN2|DAR2_ARATH Protein DA1-related 2 OS=Arabidopsis thaliana OX=3702 GN=DAR2 PE=1 SV=1
LOC_Os06g36390	-1.22897	1.63801e-29	Down	--
LOC_Os06g14420	-2.06819	2.18586e-29	Down	sp|Q8VY81|NUD21_ARATH Nudix hydrolase 21, chloroplastic OS=Arabidopsis thaliana OX=3702 GN=NUDT21 PE=2 SV=1
LOC_Os12g08130	-1.86613	3.65617e-29	Down	sp|Q39134|AAP3_ARATH Amino acid permease 3 OS=Arabidopsis thaliana OX=3702 GN=AAP3 PE=1 SV=2
LOC_Os01g67360	1.61058	3.68199e-29	Up	sp|Q9SZX8|PMTH_ARATH Probable methyltransferase PMT17 OS=Arabidopsis thaliana OX=3702 GN=At4g10440 PE=3 SV=1
LOC_Os04g30490	1.42592	4.65253e-29	Up	sp|Q9FHB6|DTX16_ARATH Protein DETOXIFICATION 16 OS=Arabidopsis thaliana OX=3702 GN=DTX16 PE=2 SV=1
LOC_Os02g30480	2.20688	8.18447e-29	Up	--
LOC_Os01g01660	1.48595	9.51095e-29	Up	sp|P52580|IFRH_MAIZE Isoflavone reductase homolog IRL OS=Zea mays OX=4577 GN=IRL PE=2 SV=1
LOC_Os10g02480	1.14003	1.07528e-28	Up	sp|A0A1X9QHJ0|DMS1D_WHEAT Deoxymugineic acid synthase 1-D OS=Triticum aestivum OX=4565 GN=DMAS1-D PE=2 SV=1
LOC_Os03g32526	3.29031	1.28711e-28	Up	sp|B6SFA4|MAA3_ARATH Probable helicase MAGATAMA 3 OS=Arabidopsis thaliana OX=3702 GN=MAA3 PE=2 SV=1
LOC_Os12g38720	2.22865	1.44559e-28	Up	--
LOC_Os04g44910	-1.18333	1.86677e-28	Down	sp|Q7XUN6|SIT2_ORYSJ L-type lectin-domain containing receptor kinase SIT2 OS=Oryza sativa subsp. japonica OX=39947 GN=SIT2 PE=2 SV=2
LOC_Os09g32840	-2.37567	3.25004e-28	Down	sp|Q5MAU8|PPA27_ARATH Probable inactive purple acid phosphatase 27 OS=Arabidopsis thaliana OX=3702 GN=PAP27 PE=2 SV=1
LOC_Os03g04680	-1.07414	3.7594e-28	Down	sp|A0A140IL90|C96T1_NARAP Noroxomaritidine synthase OS=Narcissus aff. pseudonarcissus MK-2014 OX=1540222 GN=Cyp96T1 PE=1 SV=1
LOC_Os01g11130	1.03626	4.19393e-28	Up	--
LOC_Os09g36930	1.44223	4.38337e-28	Up	sp|Q651D5|PIP27_ORYSJ Probable aquaporin PIP2-7 OS=Oryza sativa subsp. japonica OX=39947 GN=PIP2-7 PE=2 SV=2
LOC_Os01g03950	-1.19616	6.55377e-28	Down	sp|Q9S7Y7|XYL1_ARATH Alpha-xylosidase 1 OS=Arabidopsis thaliana OX=3702 GN=XYL1 PE=1 SV=1
LOC_Os09g39650	1.04273	1.50213e-27	Up	sp|Q8GUH1|PUB33_ARATH U-box domain-containing protein 33 OS=Arabidopsis thaliana OX=3702 GN=PUB33 PE=2 SV=2
LOC_Os03g02020	1.41774	1.52013e-27	Up	sp|Q9SIP1|UP3_ARATH Stress-response A/B barrel domain-containing protein UP3 OS=Arabidopsis thaliana OX=3702 GN=UP3 PE=1 SV=1
LOC_Os01g10520	1.16461	2.20298e-27	Up	--
LOC_Os02g38320	1.37506	3.08887e-27	Up	sp|Q9FMK7|BT1_ARATH BTB/POZ and TAZ domain-containing protein 1 OS=Arabidopsis thaliana OX=3702 GN=BT1 PE=1 SV=1
LOC_Os08g36910	1.93413	3.53388e-27	Up	sp|P27933|AMY3D_ORYSJ Alpha-amylase isozyme 3D OS=Oryza sativa subsp. japonica OX=39947 GN=AMY1.3 PE=2 SV=2
LOC_Os01g70520	1.32811	3.70307e-27	Up	sp|Q5JK35|BGL05_ORYSJ Beta-glucosidase 5 OS=Oryza sativa subsp. japonica OX=39947 GN=BGLU5 PE=2 SV=1
LOC_Os10g12130	1.09	6.37431e-27	Up	--
LOC_Os04g58570	1.95512	7.61427e-27	Up	sp|Q9C8S6|PP16B_ARATH 16 kDa phloem protein 2 OS=Arabidopsis thaliana OX=3702 GN=PP16-2 PE=1 SV=1
LOC_Os02g16050	1.39839	7.77802e-27	Up	sp|Q9LNG5|PPP7L_ARATH Serine/threonine-protein phosphatase 7 long form homolog OS=Arabidopsis thaliana OX=3702 GN=MAIL3 PE=2 SV=1
LOC_Os05g14560	2.02211	8.72377e-27	Up	--
LOC_Os01g52010	1.06755	1.0982e-26	Up	sp|Q93Z38|TAR4_ARATH Tryptophan aminotransferase-related protein 4 OS=Arabidopsis thaliana OX=3702 GN=TAR4 PE=2 SV=2
LOC_Os02g13570	2.302	1.1132e-26	Up	sp|Q0E2L3|KN14D_ORYSJ Kinesin-like protein KIN-14D OS=Oryza sativa subsp. japonica OX=39947 GN=KIN14D PE=3 SV=2
LOC_Os05g48630	1.29079	1.12854e-26	Up	sp|A2Y7D9|PSAH_ORYSI Photosystem I reaction center subunit VI, chloroplastic OS=Oryza sativa subsp. indica OX=39946 GN=PSAH PE=2 SV=1
LOC_Os05g12580	1.09359	1.30766e-26	Up	sp|O82337|AGP16_ARATH Arabinogalactan protein 16 OS=Arabidopsis thaliana OX=3702 GN=AGP16 PE=1 SV=1
LOC_Os02g33330	1.23799	1.36913e-26	Up	sp|Q9FMS4|SIED1_ARATH Protein salt-induced and EIN3/EIL1-dependent 1 OS=Arabidopsis thaliana OX=3702 GN=SIED1 PE=4 SV=1
LOC_Os04g58810	-3.22764	1.67098e-26	Down	sp|Q9FMS6|CAF1K_ARATH Probable CCR4-associated factor 1 homolog 11 OS=Arabidopsis thaliana OX=3702 GN=CAF1-11 PE=2 SV=1
LOC_Os06g20790	4.11718	2.5191e-26	Up	sp|Q9AR07|JMT_ARATH Jasmonate O-methyltransferase OS=Arabidopsis thaliana OX=3702 GN=JMT PE=1 SV=3
LOC_Os11g39370	1.56195	3.13329e-26	Up	sp|Q6K4T4|SERK4_ORYSJ LRR receptor kinase SERK2 OS=Oryza sativa subsp. japonica OX=39947 GN=SERK4 PE=3 SV=1
LOC_Os07g40690	3.18204	4.56854e-26	Up	sp|Q5XLY0|ANR_GINBI Putative anthocyanidin reductase OS=Ginkgo biloba OX=3311 PE=2 SV=1
LOC_Os06g39230	1.10285	5.76259e-26	Up	sp|A0A2I7G3B0|ALDH1_TANCI Aldehyde dehydrogenase 1 OS=Tanacetum cinerariifolium OX=118510 GN=ALDH1 PE=1 SV=1
LOC_Os03g27910	3.96823	6.07432e-26	Up	sp|P10978|POLX_TOBAC Retrovirus-related Pol polyprotein from transposon TNT 1-94 OS=Nicotiana tabacum OX=4097 PE=2 SV=1
LOC_Os03g01300	2.65811	6.47358e-26	Up	sp|Q01595|CCDP_MAIZE Cortical cell-delineating protein OS=Zea mays OX=4577 PE=2 SV=1
LOC_Os06g42910	2.33695	1.26734e-25	Up	--
LOC_Os11g28530	3.20234	1.28341e-25	Up	sp|Q6BDZ9|KSL8_ORYSJ Stemar-13-ene synthase OS=Oryza sativa subsp. japonica OX=39947 GN=KSL8 PE=2 SV=2
LOC_Os01g05430	1.15903	1.32215e-25	Up	sp|Q0WQX7|RBL1_ARATH RHOMBOID-like protein 1 OS=Arabidopsis thaliana OX=3702 GN=RBL1 PE=2 SV=1
LOC_Os02g33820	1.82002	1.56359e-25	Up	sp|Q08655|ASR1_SOLLC Abscisic stress-ripening protein 1 OS=Solanum lycopersicum OX=4081 GN=ASR1 PE=2 SV=1
LOC_Os12g32610	-1.44348	1.5794e-25	Down	--
LOC_Os03g19380	1.41442	2.06273e-25	Up	sp|O22914|CP121_ARATH Calvin cycle protein CP12-1, chloroplastic OS=Arabidopsis thaliana OX=3702 GN=CP12-1 PE=1 SV=1
LOC_Os01g04920	-1.6799	2.23863e-25	Down	sp|Q8S4F6|SQD2_ARATH Sulfoquinovosyl transferase SQD2 OS=Arabidopsis thaliana OX=3702 GN=SQD2 PE=1 SV=1
LOC_Os11g45290	2.88039	2.84051e-25	Up	--
LOC_Os07g43570	2.54067	3.21872e-25	Up	sp|Q0D5R3|CRK6_ORYSJ Cysteine-rich receptor-like protein kinase 6 OS=Oryza sativa subsp. japonica OX=39947 GN=CRK6 PE=1 SV=1
LOC_Os04g49930	1.04559	3.52265e-25	Up	sp|Q8GWZ6|SRR1_ARATH Protein SENSITIVITY TO RED LIGHT REDUCED 1 OS=Arabidopsis thaliana OX=3702 GN=SRR1 PE=2 SV=2
LOC_Os02g08330	-3.43295	6.33135e-25	Down	--
LOC_Os03g43750	1.20947	6.83711e-25	Up	--
LOC_Os10g34930	1.2952	8.56796e-25	Up	sp|C0HJG8|BSP_BOSSE Basic secretory protease (Fragments) OS=Boswellia serrata OX=613112 PE=1 SV=1
LOC_Os03g62200	2.01282	9.82785e-25	Up	sp|Q851M9|AMT32_ORYSJ Ammonium transporter 3 member 2 OS=Oryza sativa subsp. japonica OX=39947 GN=AMT3-2 PE=2 SV=1
LOC_Os03g03724	-2.6	1.0027e-24	Down	--
LOC_Os09g12650	3.40588	1.18358e-24	Up	sp|Q41140|PFPA_RICCO Pyrophosphate--fructose 6-phosphate 1-phosphotransferase subunit alpha OS=Ricinus communis OX=3988 GN=PFP-ALPHA PE=3 SV=1
LOC_Os09g27040	1.34604	1.18458e-24	Up	sp|Q681K7|GEX1_ARATH Protein GAMETE EXPRESSED 1 OS=Arabidopsis thaliana OX=3702 GN=GEX1 PE=1 SV=1
LOC_Os01g67630	-1.23096	1.18974e-24	Down	sp|Q9M390|PTR1_ARATH Protein NRT1/ PTR FAMILY 8.1 OS=Arabidopsis thaliana OX=3702 GN=NPF8.1 PE=1 SV=1
LOC_Os10g37180	1.44659	1.47792e-24	Up	sp|A2Z9B8|GCSH_ORYSI Glycine cleavage system H protein, mitochondrial OS=Oryza sativa subsp. indica OX=39946 GN=GDCSH PE=2 SV=1
LOC_Os06g43930	1.49575	1.55805e-24	Up	sp|Q1PF50|EDA2_ARATH Probable serine protease EDA2 OS=Arabidopsis thaliana OX=3702 GN=EDA2 PE=2 SV=2
LOC_Os03g17410	6.58268	2.35365e-24	Up	--
LOC_Os11g09020	1.41066	2.83561e-24	Up	sp|Q39134|AAP3_ARATH Amino acid permease 3 OS=Arabidopsis thaliana OX=3702 GN=AAP3 PE=1 SV=2
LOC_Os10g40700	-1.25562	2.85791e-24	Down	sp|Q7XCA7|EXPB6_ORYSJ Expansin-B6 OS=Oryza sativa subsp. japonica OX=39947 GN=EXPB6 PE=2 SV=1
LOC_Os07g05360	2.06906	2.96614e-24	Up	sp|Q40070|PSBR_HORVU Photosystem II 10 kDa polypeptide, chloroplastic OS=Hordeum vulgare OX=4513 GN=PSBR PE=3 SV=1
LOC_Os10g04980	1.23657	3.07653e-24	Up	--
LOC_Os04g15580	1.42086	5.54412e-24	Up	sp|O81906|B120_ARATH G-type lectin S-receptor-like serine/threonine-protein kinase B120 OS=Arabidopsis thaliana OX=3702 GN=B120 PE=2 SV=1
LOC_Os02g10390	1.43696	6.55356e-24	Up	sp|Q9SY97|LHCA3_ARATH Photosystem I chlorophyll a/b-binding protein 3-1, chloroplastic OS=Arabidopsis thaliana OX=3702 GN=LHCA3 PE=1 SV=1
LOC_Os02g41580	-1.01462	6.97208e-24	Down	sp|Q9SPK4|PPCK1_ARATH Phosphoenolpyruvate carboxylase kinase 1 OS=Arabidopsis thaliana OX=3702 GN=PPCK1 PE=1 SV=1
LOC_Os02g52710	-2.01609	7.55001e-24	Down	sp|P17654|AMY1_ORYSJ Alpha-amylase OS=Oryza sativa subsp. japonica OX=39947 GN=AMY1.1 PE=1 SV=2
LOC_Os03g09170	-3.61806	9.35638e-24	Down	sp|Q8H1E4|RAP24_ARATH Ethylene-responsive transcription factor RAP2-4 OS=Arabidopsis thaliana OX=3702 GN=RAP2-4 PE=1 SV=1
LOC_Os01g52260	1.03648	9.93006e-24	Up	sp|Q8W0E4|SAT1_ORYSJ Probable serine acetyltransferase 1 OS=Oryza sativa subsp. japonica OX=39947 GN=SAT1 PE=2 SV=1
LOC_Os02g13580	1.80738	1.39799e-23	Up	sp|Q0E2L3|KN14D_ORYSJ Kinesin-like protein KIN-14D OS=Oryza sativa subsp. japonica OX=39947 GN=KIN14D PE=3 SV=2
LOC_Os04g44300	1.08964	1.46025e-23	Up	sp|Q7XKF4|YSL13_ORYSJ Probable metal-nicotianamine transporter YSL13 OS=Oryza sativa subsp. japonica OX=39947 GN=YSL13 PE=2 SV=2
LOC_Os11g03840	2.11812	1.73351e-23	Up	sp|P17801|KPRO_MAIZE Putative receptor protein kinase ZmPK1 OS=Zea mays OX=4577 GN=PK1 PE=2 SV=2
LOC_Os11g26750	-1.4442	1.99033e-23	Down	sp|A2ZDX4|DH16D_ORYSI Dehydrin Rab16D OS=Oryza sativa subsp. indica OX=39946 GN=RAB16D PE=2 SV=1
LOC_Os03g58850	-1.26536	2.463e-23	Down	--
LOC_Os10g25310	-1.55727	2.69338e-23	Down	sp|A2Z6W1|SPX3_ORYSI SPX domain-containing protein 3 OS=Oryza sativa subsp. indica OX=39946 GN=SPX3 PE=4 SV=1
LOC_Os05g26440	1.03979	3.59167e-23	Up	sp|P0C5E5|PRO7_ORYSI Prolamin PPROL 14E OS=Oryza sativa subsp. indica OX=39946 PE=3 SV=1
LOC_Os07g14600	1.36055	3.94821e-23	Up	sp|Q8H3C8|ILL8_ORYSJ IAA-amino acid hydrolase ILR1-like 8 OS=Oryza sativa subsp. japonica OX=39947 GN=ILL8 PE=2 SV=1
LOC_Os01g27790	7.57392	5.10128e-23	Up	sp|P31843|RRPO_OENBE RNA-directed DNA polymerase homolog OS=Oenothera berteroana OX=3950 PE=4 SV=1
LOC_Os05g39930	-1.00664	7.02429e-23	Down	sp|Q9LZW3|PUB16_ARATH U-box domain-containing protein 16 OS=Arabidopsis thaliana OX=3702 GN=PUB16 PE=2 SV=1
LOC_Os03g06930	1.50953	8.02081e-23	Up	sp|Q9SIW1|BLH7_ARATH BEL1-like homeodomain protein 7 OS=Arabidopsis thaliana OX=3702 GN=BLH7 PE=1 SV=1
LOC_Os11g13890	1.02301	8.36846e-23	Up	sp|Q9XF89|CB5_ARATH Chlorophyll a-b binding protein CP26, chloroplastic OS=Arabidopsis thaliana OX=3702 GN=LHCB5 PE=1 SV=1
LOC_Os12g01900	2.02959	8.65653e-23	Up	sp|P0C2F6|RNHX1_ARATH Putative ribonuclease H protein At1g65750 OS=Arabidopsis thaliana OX=3702 GN=At1g65750 PE=3 SV=1
LOC_Os04g54630	1.3034	9.47204e-23	Up	sp|Q9SJ02|STEP2_ARATH Stress enhanced protein 2, chloroplastic OS=Arabidopsis thaliana OX=3702 GN=SEP2 PE=2 SV=1
LOC_Os03g50270	1.22247	1.08801e-22	Up	--
LOC_Os01g56680	1.04198	1.10352e-22	Up	sp|Q5ZBY9|PSBW_ORYSJ Photosystem II reaction center W protein, chloroplastic OS=Oryza sativa subsp. japonica OX=39947 GN=PSBW PE=2 SV=1
LOC_Os02g30110	3.66917	1.18364e-22	Up	sp|W8JMU7|CYQ32_CATRO Cytochrome P450 81Q32 OS=Catharanthus roseus OX=4058 GN=CYP81Q32 PE=2 SV=1
LOC_Os01g47070	2.37239	1.24866e-22	Up	sp|P51614|CHIT3_VITVI Acidic endochitinase OS=Vitis vinifera OX=29760 GN=CHIT3 PE=2 SV=1
LOC_Os03g38950	1.1425	1.28552e-22	Up	--
LOC_Os04g08828	1.7082	1.54775e-22	Up	sp|Q43135|C79A1_SORBI Tyrosine N-monooxygenase OS=Sorghum bicolor OX=4558 GN=CYP79A1 PE=1 SV=3
LOC_Os03g46884	1.70895	1.9479e-22	Up	sp|Q9FFJ8|LIMYB_ARATH L10-interacting MYB domain-containing protein OS=Arabidopsis thaliana OX=3702 GN=LIMYB PE=1 SV=1
LOC_Os04g51290	1.43972	1.9718e-22	Up	sp|O22793|MORF2_ARATH Multiple organellar RNA editing factor 2, chloroplastic OS=Arabidopsis thaliana OX=3702 GN=MORF2 PE=1 SV=1
LOC_Os07g29410	1.40574	2.18458e-22	Up	sp|Q84NN4|CDSP_ORYSJ Thioredoxin-like protein CDSP32, chloroplastic OS=Oryza sativa subsp. japonica OX=39947 GN=CDSP32 PE=2 SV=1
LOC_Os09g31120	-1.00065	2.37658e-22	Down	sp|Q9SEE4|PIRL_SOLLC Pirin-like protein OS=Solanum lycopersicum OX=4081 PE=2 SV=1
LOC_Os01g07730	-1.11934	2.66784e-22	Down	sp|Q5VQL3|PPT3_ORYSJ Phosphoenolpyruvate/phosphate translocator 3, chloroplastic OS=Oryza sativa subsp. japonica OX=39947 GN=PPT3 PE=2 SV=1
LOC_Os10g31830	1.03731	3.25846e-22	Up	sp|O49841|RAC2A_ARATH Ras-related protein RABC2a OS=Arabidopsis thaliana OX=3702 GN=RABC2A PE=1 SV=1
LOC_Os01g10400	1.21265	3.47708e-22	Up	sp|A2WLS0|MT3A_ORYSI Metallothionein-like protein 3A OS=Oryza sativa subsp. indica OX=39946 GN=MT3A PE=3 SV=1
LOC_Os12g36240	-1.42573	3.75857e-22	Down	sp|P16063|ICIB_HORVU Subtilisin-chymotrypsin inhibitor CI-1B OS=Hordeum vulgare OX=4513 PE=1 SV=1
LOC_Os02g38130	1.39371	4.0739e-22	Up	sp|Q6NQK2|NAC8_ARATH SUPPRESSOR OF GAMMA RESPONSE 1 OS=Arabidopsis thaliana OX=3702 GN=SOG1 PE=1 SV=1
LOC_Os07g09190	1.97362	4.49803e-22	Up	sp|Q6YU51|DXS2_ORYSJ Probable 1-deoxy-D-xylulose-5-phosphate synthase 2, chloroplastic OS=Oryza sativa subsp. japonica OX=39947 GN=Os07g0190000 PE=2 SV=1
LOC_Os03g53410	1.22238	4.73695e-22	Up	sp|Q9ZQ31|STY13_ARATH Serine/threonine-protein kinase STY13 OS=Arabidopsis thaliana OX=3702 GN=STY13 PE=1 SV=2
LOC_Os03g39910	1.34934	5.36577e-22	Up	sp|Q9SAI1|FDM5_ARATH Factor of DNA methylation 5 OS=Arabidopsis thaliana OX=3702 GN=FDM5 PE=2 SV=1
LOC_Os09g09690	1.65464	7.33791e-22	Up	--
LOC_Os01g51670	-2.17692	1.35638e-21	Down	--
LOC_Os01g63380	1.86051	1.44889e-21	Up	sp|Q9SZL8|FRS5_ARATH Protein FAR1-RELATED SEQUENCE 5 OS=Arabidopsis thaliana OX=3702 GN=FRS5 PE=1 SV=1
LOC_Os06g13890	1.33799	1.78447e-21	Up	--
LOC_Os10g11100	1.11667	2.4665e-21	Up	--
LOC_Os09g15780	1.39858	3.03526e-21	Up	--
LOC_Os10g31440	-1.35398	3.13077e-21	Down	--
LOC_Os01g47300	-1.18585	3.65899e-21	Down	--
LOC_Os11g36790	-1.25454	5.73562e-21	Down	sp|P08770|TRA1_MAIZE Putative AC transposase OS=Zea mays OX=4577 PE=2 SV=2
LOC_Os05g15880	-1.95879	5.75309e-21	Down	sp|Q5WMW5|XIP_ORYSJ Xylanase inhibitor protein XIP OS=Oryza sativa subsp. japonica OX=39947 GN=XIP PE=2 SV=1
LOC_Os09g09930	1.23676	6.09359e-21	Up	sp|F2VYU4|PIK1_ORYSJ Disease resistance protein Pik-1 OS=Oryza sativa subsp. japonica OX=39947 GN=PIK-1 PE=1 SV=1
LOC_Os01g70210	1.56161	7.71999e-21	Up	sp|Q9SCU1|PATL6_ARATH Patellin-6 OS=Arabidopsis thaliana OX=3702 GN=PATL6 PE=2 SV=1
LOC_Os02g05470	1.46129	9.55203e-21	Up	sp|Q9LU68|CIA2_ARATH Protein CHLOROPLAST IMPORT APPARATUS 2 OS=Arabidopsis thaliana OX=3702 GN=CIA2 PE=1 SV=1
LOC_Os06g32944	1.78768	1.04086e-20	Up	sp|Q8L727|GSTT2_ARATH Glutathione S-transferase T2 OS=Arabidopsis thaliana OX=3702 GN=GSTT2 PE=2 SV=1
LOC_Os02g45225	1.78868	1.05835e-20	Up	--
LOC_Os08g42990	-1.37133	1.13791e-20	Down	--
LOC_Os11g44950	-1.09559	1.18317e-20	Down	sp|Q94KD8|BXL2_ARATH Probable beta-D-xylosidase 2 OS=Arabidopsis thaliana OX=3702 GN=BXL2 PE=2 SV=1
LOC_Os05g27650	3.64411	1.32667e-20	Up	--
LOC_Os07g01480	1.58784	1.61214e-20	Up	sp|Q9SGH4|PNSL3_ARATH Photosynthetic NDH subunit of lumenal location 3, chloroplastic OS=Arabidopsis thaliana OX=3702 GN=PNSL3 PE=1 SV=1
LOC_Os02g51470	1.12415	1.71155e-20	Up	sp|Q07300|ATPD_SORBI ATP synthase delta chain, chloroplastic OS=Sorghum bicolor OX=4558 GN=ATPD PE=2 SV=1
LOC_Os03g13120	2.22228	1.81132e-20	Up	--
LOC_Os05g06480	1.19368	1.92466e-20	Up	sp|P31414|AVP1_ARATH Pyrophosphate-energized vacuolar membrane proton pump 1 OS=Arabidopsis thaliana OX=3702 GN=AVP1 PE=1 SV=1
LOC_Os06g15400	1.07766	2.60983e-20	Up	sp|O04616|CUT1A_ARATH Protein CURVATURE THYLAKOID 1A, chloroplastic OS=Arabidopsis thaliana OX=3702 GN=CURT1A PE=1 SV=1
LOC_Os10g35370	1.16905	2.94855e-20	Up	sp|Q8W3D9|PORB_ORYSJ Protochlorophyllide reductase B, chloroplastic OS=Oryza sativa subsp. japonica OX=39947 GN=PORB PE=2 SV=1
LOC_Os12g40590	-1.69258	3.19565e-20	Down	sp|Q10CH5|PIL13_ORYSJ Transcription factor PHYTOCHROME INTERACTING FACTOR-LIKE 13 OS=Oryza sativa subsp. japonica OX=39947 GN=PIL13 PE=1 SV=1
LOC_Os04g33830	1.2155	3.39103e-20	Up	sp|Q949Q5|PSAO_ARATH Photosystem I subunit O OS=Arabidopsis thaliana OX=3702 GN=PSAO PE=1 SV=1
LOC_Os07g06834	2.54176	3.78937e-20	Up	--
LOC_Os06g32240	-1.77302	5.50451e-20	Down	sp|P09617|THN5_HORVU Leaf-specific thionin OS=Hordeum vulgare OX=4513 GN=THI1.5 PE=2 SV=2
LOC_Os07g40870	1.05657	5.62855e-20	Up	NA
LOC_Os01g46910	-1.06491	5.65498e-20	Down	--
LOC_Os01g38980	-1.17845	6.84848e-20	Down	sp|O82645|IQM1_ARATH IQ domain-containing protein IQM1 OS=Arabidopsis thaliana OX=3702 GN=IQM1 PE=1 SV=1
LOC_Os12g42900	1.24254	8.2366e-20	Up	--
LOC_Os06g15730	1.61273	9.74526e-20	Up	sp|Q9LRR5|DRL21_ARATH Putative disease resistance protein At3g14460 OS=Arabidopsis thaliana OX=3702 GN=At3g14460 PE=3 SV=1
LOC_Os05g23050	3.39741	1.01997e-19	Up	--
LOC_Os01g09540	2.34336	1.12891e-19	Up	sp|P15490|VSPA_SOYBN Stem 28 kDa glycoprotein OS=Glycine max OX=3847 GN=VSPA PE=2 SV=1
LOC_Os04g22380	1.58974	1.30135e-19	Up	sp|Q6RVV4|TIC32_PEA Short-chain dehydrogenase TIC 32, chloroplastic OS=Pisum sativum OX=3888 GN=TIC32 PE=1 SV=1
LOC_Os05g34510	1.20552	1.30462e-19	Up	--
LOC_Os12g32170	1.62723	1.47319e-19	Up	--
LOC_Os02g50110	-2.30722	1.47707e-19	Down	--
LOC_Os03g11140	1.74469	1.61498e-19	Up	sp|F4JQZ3|REN1_ARATH Rho GTPase-activating protein REN1 OS=Arabidopsis thaliana OX=3702 GN=REN1 PE=1 SV=2
LOC_Os03g63580	-1.48704	1.66932e-19	Down	sp|Q9SRQ7|NPC4_ARATH Non-specific phospholipase C4 OS=Arabidopsis thaliana OX=3702 GN=NPC4 PE=1 SV=1
LOC_Os04g43090	4.32083	1.74869e-19	Up	sp|B7EIH2|Y3643_ORYSJ B3 domain-containing protein Os03g0164300 OS=Oryza sativa subsp. japonica OX=39947 GN=Os03g0164300 PE=3 SV=1
LOC_Os03g01120	-1.54104	1.87495e-19	Down	sp|P22180|PMA1_SOLLC Plasma membrane ATPase 1 OS=Solanum lycopersicum OX=4081 GN=LHA1 PE=2 SV=1
LOC_Os04g42950	1.75401	2.64916e-19	Up	sp|Q4JL84|MYB59_ARATH Transcription factor MYB59 OS=Arabidopsis thaliana OX=3702 GN=MYB59 PE=2 SV=2
LOC_Os02g52590	1.49862	2.64929e-19	Up	sp|Q9SWH5|FUT1_ARATH Galactoside 2-alpha-L-fucosyltransferase OS=Arabidopsis thaliana OX=3702 GN=FUT1 PE=1 SV=2
LOC_Os07g30670	1.8343	2.6967e-19	Up	sp|Q9LU21|PNSB3_ARATH Photosynthetic NDH subunit of subcomplex B 3, chloroplastic OS=Arabidopsis thaliana OX=3702 GN=PNSB3 PE=2 SV=1
LOC_Os08g08970	2.45722	2.78072e-19	Up	sp|Q6YZZ7|GL83_ORYSJ Germin-like protein 8-3 OS=Oryza sativa subsp. japonica OX=39947 GN=GER2 PE=2 SV=1
LOC_Os05g45880	1.30061	2.92803e-19	Up	sp|Q8L518|CK2_ARATH Probable choline kinase 2 OS=Arabidopsis thaliana OX=3702 GN=At1g74320 PE=2 SV=1
LOC_Os06g04510	1.33119	2.9703e-19	Up	sp|P26301|ENO1_MAIZE Enolase 1 OS=Zea mays OX=4577 GN=ENO1 PE=2 SV=1
LOC_Os04g30250	1.8488	4.44271e-19	Up	sp|Q9C9L5|WAKLH_ARATH Wall-associated receptor kinase-like 9 OS=Arabidopsis thaliana OX=3702 GN=WAKL9 PE=2 SV=1
LOC_Os09g27030	1.09724	4.75499e-19	Up	sp|P25778|ORYC_ORYSJ Oryzain gamma chain OS=Oryza sativa subsp. japonica OX=39947 GN=Os09g0442300 PE=2 SV=2
LOC_Os08g01150	1.71136	6.76491e-19	Up	--
LOC_Os01g40870	2.24469	6.76917e-19	Up	sp|Q56YU0|AL2C4_ARATH Aldehyde dehydrogenase family 2 member C4 OS=Arabidopsis thaliana OX=3702 GN=ALDH2C4 PE=1 SV=2
LOC_Os10g31780	1.10124	6.80331e-19	Up	sp|Q9SQR4|ADRC3_ARATH NADPH-dependent aldehyde reductase-like protein, chloroplastic OS=Arabidopsis thaliana OX=3702 GN=At3g03980 PE=3 SV=1
LOC_Os02g39170	1.3121	7.97712e-19	Up	sp|Q3MKY2|AAE_RAUSE Acetylajmalan esterase OS=Rauvolfia serpentina OX=4060 GN=AAE PE=1 SV=1
LOC_Os11g37140	4.49602	8.01701e-19	Up	sp|Q5W6L9|KN12C_ORYSJ Kinesin-like protein KIN-12C OS=Oryza sativa subsp. japonica OX=39947 GN=KIN12C PE=2 SV=1
LOC_Os08g39300	1.42108	8.25102e-19	Up	sp|Q56YA5|SGAT_ARATH Serine--glyoxylate aminotransferase OS=Arabidopsis thaliana OX=3702 GN=AGT1 PE=1 SV=2
LOC_Os01g72460	1.09804	9.27235e-19	Up	sp|Q941Y8|NQR2_ORYSJ Probable NADPH:quinone oxidoreductase 2 OS=Oryza sativa subsp. japonica OX=39947 GN=Os01g0954000 PE=2 SV=1
LOC_Os01g68480	1.04489	1.03614e-18	Up	sp|Q8S091|TRXF_ORYSJ Thioredoxin F, chloroplastic OS=Oryza sativa subsp. japonica OX=39947 GN=Os01g0913000 PE=2 SV=1
LOC_Os02g10350	2.00131	1.05427e-18	Up	sp|O49621|MLO1_ARATH MLO-like protein 1 OS=Arabidopsis thaliana OX=3702 GN=MLO1 PE=1 SV=1
LOC_Os10g28080	2.4208	1.05593e-18	Up	sp|Q9SLP4|CHIT1_TULSB Chitinase 1 OS=Tulipa saxatilis subsp. bakeri OX=110455 PE=1 SV=1
LOC_Os02g03640	1.07728	1.22605e-18	Up	--
LOC_Os01g70490	2.28141	1.25836e-18	Up	sp|Q5JK32|HAK5_ORYSJ Potassium transporter 5 OS=Oryza sativa subsp. japonica OX=39947 GN=HAK5 PE=2 SV=2
LOC_Os03g59600	2.13614	1.37337e-18	Up	sp|Q8RXF8|MIRO1_ARATH Mitochondrial Rho GTPase 1 OS=Arabidopsis thaliana OX=3702 GN=MIRO1 PE=1 SV=1
LOC_Os01g39960	1.68789	1.4442e-18	Up	sp|Q38932|LCYE_ARATH Lycopene epsilon cyclase, chloroplastic OS=Arabidopsis thaliana OX=3702 GN=LUT2 PE=1 SV=2
LOC_Os11g44750	1.43887	1.49631e-18	Up	sp|Q9T058|Y4119_ARATH G-type lectin S-receptor-like serine/threonine-protein kinase At4g11900 OS=Arabidopsis thaliana OX=3702 GN=At4g11900 PE=2 SV=1
LOC_Os01g38580	1.92575	1.75273e-18	Up	sp|Q93VD5|CCD8A_ORYSJ Carotenoid cleavage dioxygenase 8 homolog A, chloroplastic OS=Oryza sativa subsp. japonica OX=39947 GN=CCD8A PE=2 SV=1
LOC_Os01g26390	1.44213	1.8226e-18	Up	sp|Q0D5R2|CRK10_ORYSJ Cysteine-rich receptor-like protein kinase 10 OS=Oryza sativa subsp. japonica OX=39947 GN=CRK10 PE=2 SV=1
LOC_Os12g01370	-1.19097	1.82486e-18	Down	sp|Q594P3|DES3_SORBI Fatty acid desaturase DES3 OS=Sorghum bicolor OX=4558 GN=DES3 PE=1 SV=1
LOC_Os07g19540	-1.55212	1.85253e-18	Down	--
LOC_Os08g10020	1.24508	1.85409e-18	Up	sp|P10690|PSBR_SPIOL Photosystem II 10 kDa polypeptide, chloroplastic OS=Spinacia oleracea OX=3562 GN=PSBR PE=2 SV=1
LOC_Os02g57280	1.42326	2.08521e-18	Up	--
LOC_Os11g43760	-1.72877	2.30696e-18	Down	--
LOC_Os07g01090	1.32472	2.32493e-18	Up	sp|Q69LA1|PROT2_ORYSJ Probable proline transporter 2 OS=Oryza sativa subsp. japonica OX=39947 GN=LOC_Os07g01090 PE=2 SV=1
LOC_Os02g08320	1.05306	2.42554e-18	Up	sp|Q6ETK9|ADPO2_ORYSJ Heptahelical transmembrane protein ADIPOR2 OS=Oryza sativa subsp. japonica OX=39947 GN=ADIPOR2 PE=2 SV=1
LOC_Os05g03750	1.52719	2.49089e-18	Up	--
LOC_Os02g13800	-1.19282	2.89243e-18	Down	sp|Q6EUG4|HFC2A_ORYSJ Heat stress transcription factor C-2a OS=Oryza sativa subsp. japonica OX=39947 GN=HSFC2A PE=2 SV=1
LOC_Os04g03164	2.40344	3.07368e-18	Up	--
LOC_Os01g70400	1.35607	3.33433e-18	Up	sp|Q9FG89|PNSB5_ARATH Photosynthetic NDH subunit of subcomplex B 5, chloroplastic OS=Arabidopsis thaliana OX=3702 GN=PNSB5 PE=2 SV=1
LOC_Os05g14820	-4.47225	3.3706e-18	Down	sp|Q9FKS8|LHT1_ARATH Lysine histidine transporter 1 OS=Arabidopsis thaliana OX=3702 GN=LHT1 PE=1 SV=1
LOC_Os04g48390	1.07215	3.77786e-18	Up	sp|B8AT51|SPXM2_ORYSI SPX domain-containing membrane protein OsI_17046 OS=Oryza sativa subsp. indica OX=39946 GN=OsI_17046 PE=3 SV=1
LOC_Os10g01820	-1.26293	4.47629e-18	Down	--
LOC_Os05g28740	1.28305	4.80246e-18	Up	sp|Q8LGG8|USPAL_ARATH Universal stress protein A-like protein OS=Arabidopsis thaliana OX=3702 GN=At3g01520 PE=1 SV=2
LOC_Os01g56420	-1.02285	4.89925e-18	Down	sp|Q94EE4|COPT1_ORYSJ Copper transporter 1 OS=Oryza sativa subsp. japonica OX=39947 GN=COPT1 PE=2 SV=1
LOC_Os12g01510	1.68622	4.92787e-18	Up	sp|Q9LYN6|Y3565_ARATH Probable inactive receptor-like protein kinase At3g56050 OS=Arabidopsis thaliana OX=3702 GN=At3g56050 PE=2 SV=1
LOC_Os03g60992	1.24975	5.99898e-18	Up	sp|Q9LEU8|ARLY_ARATH Argininosuccinate lyase, chloroplastic OS=Arabidopsis thaliana OX=3702 GN=At5g10920 PE=2 SV=1
LOC_Os10g19160	-1.14391	6.54041e-18	Down	sp|C0LGP4|Y3475_ARATH Probable LRR receptor-like serine/threonine-protein kinase At3g47570 OS=Arabidopsis thaliana OX=3702 GN=At3g47570 PE=2 SV=1
LOC_Os07g39740	1.46335	6.57383e-18	Up	sp|Q9LIN2|GDL53_ARATH GDSL esterase/lipase At3g26430 OS=Arabidopsis thaliana OX=3702 GN=At3g26430 PE=2 SV=1
LOC_Os07g37690	1.25595	7.70263e-18	Up	sp|D3UAG0|U71K1_MALDO UDP-glycosyltransferase 71K1 OS=Malus domestica OX=3750 GN=UGT71K1 PE=1 SV=1
LOC_Os10g36924	-1.20117	9.23763e-18	Down	sp|Q0IWF3|NIP31_ORYSJ Aquaporin NIP3-1 OS=Oryza sativa subsp. japonica OX=39947 GN=NIP3-1 PE=2 SV=2
LOC_Os12g11980	4.77331	9.86011e-18	Up	--
LOC_Os09g17800	1.51683	1.02853e-17	Up	sp|P31843|RRPO_OENBE RNA-directed DNA polymerase homolog OS=Oenothera berteroana OX=3950 PE=4 SV=1
LOC_Os03g01170	1.01753	1.20225e-17	Up	sp|Q07423|HEX6_RICCO Hexose carrier protein HEX6 OS=Ricinus communis OX=3988 GN=HEX6 PE=2 SV=1
LOC_Os04g38600	1.03713	1.68133e-17	Up	sp|P09315|G3PA_MAIZE Glyceraldehyde-3-phosphate dehydrogenase A, chloroplastic OS=Zea mays OX=4577 GN=GAPA PE=2 SV=1
LOC_Os09g37012	1.01173	1.78818e-17	Up	sp|Q8VYV9|APF1_ARATH Aspartyl protease family protein 1 OS=Arabidopsis thaliana OX=3702 GN=APF1 PE=2 SV=1
LOC_Os03g06460	-1.75032	2.01339e-17	Down	sp|Q8GTS0|IP5P4_ARATH Type I inositol polyphosphate 5-phosphatase 4 OS=Arabidopsis thaliana OX=3702 GN=IP5P4 PE=2 SV=1
LOC_Os06g03930	1.38005	2.17578e-17	Up	sp|Q50EK3|C04C1_PINTA Cytochrome P450 704C1 OS=Pinus taeda OX=3352 GN=CYP704C1 PE=2 SV=1
LOC_Os06g11650	1.19408	2.45173e-17	Up	sp|Q9FE06|EXOL2_ARATH Protein EXORDIUM-like 2 OS=Arabidopsis thaliana OX=3702 GN=EXL2 PE=2 SV=1
LOC_Os06g42680	-1.20233	2.85694e-17	Down	sp|Q0DAS9|PSK1_ORYSJ Phytosulfokines 1 OS=Oryza sativa subsp. japonica OX=39947 GN=PSK1 PE=1 SV=1
LOC_Os07g09760	1.04284	3.08568e-17	Up	sp|Q94HW2|POLR1_ARATH Retrovirus-related Pol polyprotein from transposon RE1 OS=Arabidopsis thaliana OX=3702 GN=RE1 PE=2 SV=1
LOC_Os11g01439	1.35107	3.49291e-17	Up	sp|Q9LI74|CHUP1_ARATH Protein CHUP1, chloroplastic OS=Arabidopsis thaliana OX=3702 GN=CHUP1 PE=1 SV=1
LOC_Os07g10120	1.21449	3.73616e-17	Up	--
LOC_Os10g34680	6.64803	4.11647e-17	Up	sp|Q94KD3|VP52A_ARATH Vacuolar protein sorting-associated protein 52 A OS=Arabidopsis thaliana OX=3702 GN=VPS52 PE=1 SV=1
LOC_Os01g20830	2.13763	4.36167e-17	Up	sp|B3H6D0|HIP45_ARATH Heavy metal-associated isoprenylated plant protein 45 OS=Arabidopsis thaliana OX=3702 GN=HIPP45 PE=3 SV=1
LOC_Os09g30340	1.1967	4.75405e-17	Up	sp|Q00327|PSAG_HORVU Photosystem I reaction center subunit V, chloroplastic OS=Hordeum vulgare OX=4513 GN=PSAG PE=1 SV=1
LOC_Os04g35790	1.3926	5.10012e-17	Up	sp|Q9LU33|GLTP3_ARATH Glycolipid transfer protein 3 OS=Arabidopsis thaliana OX=3702 GN=GLTP3 PE=2 SV=1
LOC_Os01g64960	1.07966	5.56983e-17	Up	sp|A2WXD9|PSBS1_ORYSI Photosystem II 22 kDa protein 1, chloroplastic OS=Oryza sativa subsp. indica OX=39946 GN=PSBS1 PE=1 SV=1
LOC_Os07g23660	1.84429	5.67559e-17	Up	--
LOC_Os01g06900	1.12731	5.94852e-17	Up	sp|O49329|RP24L_ARATH Receptor like protein 24 OS=Arabidopsis thaliana OX=3702 GN=RLP24 PE=3 SV=1
LOC_Os03g61900	1.32076	6.18203e-17	Up	--
LOC_Os08g32120	1.67345	8.15814e-17	Up	--
LOC_Os11g43790	-1.9076	9.43702e-17	Down	sp|Q9SGZ8|FLZ6_ARATH FCS-Like Zinc finger 6 OS=Arabidopsis thaliana OX=3702 GN=FLZ6 PE=1 SV=1
LOC_Os02g52910	1.35015	9.63412e-17	Up	--
LOC_Os08g14450	1.45895	1.2126e-16	Up	sp|Q9LD95|SIGF_ARATH RNA polymerase sigma factor sigF, chloroplastic OS=Arabidopsis thaliana OX=3702 GN=SIGF PE=1 SV=1
LOC_Os08g36480	2.34199	1.22518e-16	Up	sp|P16081|NIA1_ORYSJ Nitrate reductase [NADH] 1 OS=Oryza sativa subsp. japonica OX=39947 GN=NIA1 PE=2 SV=3
LOC_Os02g08450	2.44506	1.26665e-16	Up	sp|Q94K49|ALP1_ARATH Protein ANTAGONIST OF LIKE HETEROCHROMATIN PROTEIN 1 OS=Arabidopsis thaliana OX=3702 GN=ALP1 PE=1 SV=1
LOC_Os10g27330	1.34629	1.64588e-16	Up	sp|K7PEY4|RAM2_MEDTR Glycerol-3-phosphate acyltransferase RAM2 OS=Medicago truncatula OX=3880 GN=RAM2 PE=2 SV=1
LOC_Os12g27210	-1.00489	2.28769e-16	Down	--
LOC_Os01g50420	-1.13623	2.48513e-16	Down	sp|O80888|M3K17_ARATH Mitogen-activated protein kinase kinase kinase 17 OS=Arabidopsis thaliana OX=3702 GN=MAPKKK17 PE=1 SV=1
LOC_Os02g07360	1.16147	2.49891e-16	Up	sp|O82178|PP186_ARATH Pentatricopeptide repeat-containing protein At2g35130 OS=Arabidopsis thaliana OX=3702 GN=At2g35130 PE=3 SV=1
LOC_Os07g38810	2.18019	2.75637e-16	Up	sp|Q7XUN6|SIT2_ORYSJ L-type lectin-domain containing receptor kinase SIT2 OS=Oryza sativa subsp. japonica OX=39947 GN=SIT2 PE=2 SV=2
LOC_Os01g03340	-1.04449	2.96262e-16	Down	sp|A2WK50|IBBR_ORYSI Bowman-Birk type bran trypsin inhibitor OS=Oryza sativa subsp. indica OX=39946 GN=RBBI3.3 PE=2 SV=2
LOC_Os07g26110	-1.22934	3.22876e-16	Down	sp|Q6YT98|CSPL7_ORYSJ CASP-like protein 1D1 OS=Oryza sativa subsp. japonica OX=39947 GN=Os07g0442900 PE=2 SV=1
LOC_Os06g13830	-1.94869	3.33528e-16	Down	sp|Q654U4|GUN16_ORYSJ Endoglucanase 16 OS=Oryza sativa subsp. japonica OX=39947 GN=Os06g0247900 PE=2 SV=2
LOC_Os01g08630	2.17058	3.49432e-16	Up	--
LOC_Os07g35960	3.41746	3.67361e-16	Up	--
LOC_Os02g41860	1.71527	3.73073e-16	Up	sp|Q6K215|PIP22_ORYSJ Probable aquaporin PIP2-2 OS=Oryza sativa subsp. japonica OX=39947 GN=PIP2-2 PE=2 SV=1
LOC_Os03g51240	1.05147	3.80897e-16	Up	sp|Q9M069|E137_ARATH Glucan endo-1,3-beta-glucosidase 7 OS=Arabidopsis thaliana OX=3702 GN=At4g34480 PE=1 SV=2
LOC_Os01g50530	2.82915	4.44605e-16	Up	sp|B9DFU2|MAX1_ARATH Cytochrome P450 711A1 OS=Arabidopsis thaliana OX=3702 GN=CYP711A1 PE=2 SV=1
LOC_Os10g35160	1.93194	5.07602e-16	Up	--
LOC_Os03g31430	5.0198	5.09333e-16	Up	sp|B9SCB6|TPS2_RICCO Probable terpene synthase 2 OS=Ricinus communis OX=3988 GN=TPS2 PE=3 SV=1
LOC_Os11g07830	1.59326	5.15638e-16	Up	sp|Q9SS03|DIR21_ARATH Dirigent protein 21 OS=Arabidopsis thaliana OX=3702 GN=DIR21 PE=3 SV=1
LOC_Os01g47510	10.0633	6.22583e-16	Up	sp|P0C2F6|RNHX1_ARATH Putative ribonuclease H protein At1g65750 OS=Arabidopsis thaliana OX=3702 GN=At1g65750 PE=3 SV=1
LOC_Os02g15178	1.37548	6.31155e-16	Up	sp|P14323|GLUB1_ORYSJ Glutelin type-B 1 OS=Oryza sativa subsp. japonica OX=39947 GN=GluB1-A PE=2 SV=3
LOC_Os08g10250	2.96423	8.53846e-16	Up	sp|C0LGH3|Y5614_ARATH Probable LRR receptor-like serine/threonine-protein kinase At1g56140 OS=Arabidopsis thaliana OX=3702 GN=At1g56140 PE=2 SV=2
LOC_Os08g30120	1.80028	1.13685e-15	Up	--
LOC_Os12g06130	1.1753	1.60437e-15	Up	--
LOC_Os04g12960	6.37563	1.61449e-15	Up	sp|M0Y4P1|UGT13_HORVV UDP-glucosyltransferase UGT13248 OS=Hordeum vulgare subsp. vulgare OX=112509 PE=2 SV=1
LOC_Os08g26880	1.70556	1.77739e-15	Up	sp|C0Z2L5|BZP44_ARATH bZIP transcription factor 44 OS=Arabidopsis thaliana OX=3702 GN=BZIP44 PE=1 SV=1
LOC_Os01g44330	2.07382	1.88926e-15	Up	sp|Q8RYM9|LAC2_ORYSJ Laccase-2 OS=Oryza sativa subsp. japonica OX=39947 GN=LAC2 PE=2 SV=1
LOC_Os09g17740	1.24708	2.34584e-15	Up	sp|P12330|CB21_ORYSJ Chlorophyll a-b binding protein 1, chloroplastic OS=Oryza sativa subsp. japonica OX=39947 GN=CAB1R PE=2 SV=2
LOC_Os08g30020	-1.16348	2.38329e-15	Down	sp|Q8L7A0|TAUE3_ARATH Sulfite exporter TauE/SafE family protein 3 OS=Arabidopsis thaliana OX=3702 GN=At2g25737 PE=2 SV=1
LOC_Os01g33350	-1.82342	2.39004e-15	Down	--
LOC_Os07g04840	1.38802	2.41928e-15	Up	sp|Q00434|PSBP_WHEAT Oxygen-evolving enhancer protein 2, chloroplastic OS=Triticum aestivum OX=4565 GN=PSBP PE=2 SV=1
LOC_Os12g35890	1.56352	2.76945e-15	Up	sp|Q9SJA7|SOX_ARATH Probable sarcosine oxidase OS=Arabidopsis thaliana OX=3702 GN=At2g24580 PE=2 SV=1
LOC_Os03g58610	1.11297	2.86576e-15	Up	--
LOC_Os03g53340	-3.04746	3.12662e-15	Down	sp|Q84MN7|HFA2A_ORYSJ Heat stress transcription factor A-2a OS=Oryza sativa subsp. japonica OX=39947 GN=HSFA2A PE=2 SV=1
LOC_Os02g15169	1.70748	3.36688e-15	Up	sp|P14323|GLUB1_ORYSJ Glutelin type-B 1 OS=Oryza sativa subsp. japonica OX=39947 GN=GluB1-A PE=2 SV=3
LOC_Os08g45200	-1.21987	3.79545e-15	Down	sp|Q9SY60|EX84C_ARATH Exocyst complex component EXO84C OS=Arabidopsis thaliana OX=3702 GN=EXO84C PE=2 SV=1
LOC_Os02g56900	-1.06475	3.88819e-15	Down	sp|Q93VG8|PPDEX_ARATH DeSI-like protein At4g17486 OS=Arabidopsis thaliana OX=3702 GN=At4g17486 PE=2 SV=1
LOC_Os03g63310	2.01437	4.05279e-15	Up	sp|O48958|C71E1_SORBI 4-hydroxyphenylacetaldehyde oxime monooxygenase OS=Sorghum bicolor OX=4558 GN=CYP71E1 PE=1 SV=1
LOC_Os01g69060	1.06595	4.1967e-15	Up	sp|Q0J0A4|LPAAT_ORYSJ Probable 1-acylglycerol-3-phosphate O-acyltransferase OS=Oryza sativa subsp. japonica OX=39947 GN=Os09g0520200 PE=3 SV=3
LOC_Os04g27960	2.66574	4.48001e-15	Up	sp|Q7XS75|Y4469_ORYSJ Putative B3 domain-containing protein Os04g0346900 OS=Oryza sativa subsp. japonica OX=39947 GN=Os04g0346900 PE=3 SV=2
LOC_Os06g21240	1.18627	5.00676e-15	Up	--
LOC_Os02g49680	1.73986	5.18371e-15	Up	sp|B6TVL4|CAS_MAIZE Calcium sensing receptor, chloroplastic OS=Zea mays OX=4577 PE=1 SV=1
LOC_Os10g28030	1.0886	5.505e-15	Up	sp|Q338C0|AARE2_ORYSJ Acylamino-acid-releasing enzyme 2 OS=Oryza sativa subsp. japonica OX=39947 GN=Os10g0415800 PE=3 SV=1
LOC_Os01g65770	1.14658	5.80079e-15	Up	--
LOC_Os03g26020	-2.71637	5.94898e-15	Down	sp|P92523|M860_ARATH Uncharacterized mitochondrial protein AtMg00860 OS=Arabidopsis thaliana OX=3702 GN=AtMg00860 PE=4 SV=1
LOC_Os02g45780	-1.62447	6.13317e-15	Down	sp|Q9XF92|BRH1_ARATH Brassinosteroid-responsive RING protein 1 OS=Arabidopsis thaliana OX=3702 GN=BRH1 PE=2 SV=1
LOC_Os01g06310	1.33571	6.16604e-15	Up	--
LOC_Os08g44680	1.66272	6.21909e-15	Up	sp|P36213|PSAD_HORVU Photosystem I reaction center subunit II, chloroplastic OS=Hordeum vulgare OX=4513 GN=psaD PE=1 SV=1
LOC_Os02g01850	6.28622	6.28219e-15	Up	--
LOC_Os12g36110	1.31278	9.24453e-15	Up	sp|Q9FKL6|CB60B_ARATH Calmodulin-binding protein 60 B OS=Arabidopsis thaliana OX=3702 GN=CBP60B PE=2 SV=1
LOC_Os01g74410	3.04544	9.54052e-15	Up	sp|Q4JL76|MYBA2_ORYSJ Myb-related protein MYBAS2 OS=Oryza sativa subsp. japonica OX=39947 GN=MYBAS2 PE=2 SV=1
LOC_Os01g49820	1.28069	9.57945e-15	Up	sp|Q9XI60|LPP2_ARATH Lipid phosphate phosphatase 2 OS=Arabidopsis thaliana OX=3702 GN=LPP2 PE=2 SV=1
LOC_Os12g23180	1.25882	9.74814e-15	Up	sp|Q9SA52|CP41B_ARATH Chloroplast stem-loop binding protein of 41 kDa b, chloroplastic OS=Arabidopsis thaliana OX=3702 GN=CSP41B PE=1 SV=1
LOC_Os06g36940	-1.02592	1.0946e-14	Down	--
LOC_Os07g08800	-2.2238	1.10758e-14	Down	--
LOC_Os02g22100	1.55218	1.21789e-14	Up	sp|Q9FFX0|RBL9_ARATH RHOMBOID-like protein 9, chloroplastic OS=Arabidopsis thaliana OX=3702 GN=RBL9 PE=2 SV=1
LOC_Os02g18670	1.82296	1.40384e-14	Up	sp|Q9LK64|AB3C_ARATH ABC transporter C family member 3 OS=Arabidopsis thaliana OX=3702 GN=ABCC3 PE=1 SV=1
LOC_Os08g02630	1.10675	1.48025e-14	Up	sp|P80470|PSBY_SPIOL Photosystem II core complex proteins psbY, chloroplastic OS=Spinacia oleracea OX=3562 GN=PSBY PE=1 SV=2
LOC_Os10g39130	1.2072	1.69084e-14	Up	sp|P0C5B2|MAD56_ORYSJ MADS-box transcription factor 56 OS=Oryza sativa subsp. japonica OX=39947 GN=MADS56 PE=2 SV=1
LOC_Os07g12090	1.21954	1.69131e-14	Up	sp|P16969|IAA_HORVU Alpha-amylase/trypsin inhibitor OS=Hordeum vulgare OX=4513 PE=2 SV=1
LOC_Os03g25500	1.10601	1.73335e-14	Up	sp|F4IK45|C70B2_ARATH Cytochrome P450 709B2 OS=Arabidopsis thaliana OX=3702 GN=CYP709B2 PE=2 SV=1
LOC_Os01g51770	1.43948	1.93597e-14	Up	sp|Q0JJV1|VDAC4_ORYSJ Mitochondrial outer membrane protein porin 4 OS=Oryza sativa subsp. japonica OX=39947 GN=VDAC4 PE=3 SV=3
LOC_Os07g26560	1.60083	2.02578e-14	Up	--
LOC_Os12g19381	1.29426	2.37271e-14	Up	sp|P18566|RBS2_ORYSJ Ribulose bisphosphate carboxylase small chain A, chloroplastic OS=Oryza sativa subsp. japonica OX=39947 GN=RBCS-A PE=2 SV=2
LOC_Os02g07820	1.52592	2.70687e-14	Up	sp|Q8GRN0|FLZ13_ARATH FCS-Like Zinc finger 13 OS=Arabidopsis thaliana OX=3702 GN=FLZ13 PE=1 SV=1
LOC_Os12g32360	1.88813	3.65264e-14	Up	--
LOC_Os01g45430	1.03794	3.7839e-14	Up	sp|P0C073|RUB1_DESAN Ubiquitin-NEDD8-like protein RUB1 OS=Deschampsia antarctica OX=159298 GN=RUB1 PE=2 SV=2
LOC_Os05g06660	2.86412	4.01431e-14	Up	sp|Q5W727|SCP26_ORYSJ Serine carboxypeptidase-like 26 OS=Oryza sativa subsp. japonica OX=39947 GN=SCP26 PE=2 SV=1
LOC_Os06g35700	2.2269	4.76598e-14	Up	sp|Q5QJ60|CYND4_CYNDA Berberine bridge enzyme-like Cyn d 4 OS=Cynodon dactylon OX=28909 PE=1 SV=1
LOC_Os09g33690	1.03063	4.88702e-14	Up	sp|Q0J0G2|BGL32_ORYSJ Beta-glucosidase 32 OS=Oryza sativa subsp. japonica OX=39947 GN=BGLU32 PE=2 SV=2
LOC_Os01g39136	-1.95065	5.17226e-14	Down	--
LOC_Os01g68820	3.38186	5.34123e-14	Up	--
LOC_Os12g12090	2.20823	5.44509e-14	Up	--
LOC_Os07g46630	1.35328	6.2845e-14	Up	sp|Q8LPL7|ADAL_ARATH N6-mAMP deaminase OS=Arabidopsis thaliana OX=3702 GN=MAPDA PE=1 SV=1
LOC_Os03g56580	2.07117	6.70415e-14	Up	sp|Q9SK55|NAC42_ARATH Transcription factor JUNGBRUNNEN 1 OS=Arabidopsis thaliana OX=3702 GN=JUB1 PE=1 SV=1
LOC_Os04g58200	1.81784	6.93646e-14	Up	sp|Q7XKF3|PORA_ORYSJ Protochlorophyllide reductase A, chloroplastic OS=Oryza sativa subsp. japonica OX=39947 GN=PORA PE=2 SV=1
LOC_Os08g07480	1.19585	7.44162e-14	Up	sp|Q9LK40|NRPD2_ARATH DNA-directed RNA polymerases IV and V subunit 2 OS=Arabidopsis thaliana OX=3702 GN=NRPD2 PE=1 SV=1
LOC_Os12g23200	1.48677	7.72216e-14	Up	sp|P23993|PSAL_HORVU Photosystem I reaction center subunit XI, chloroplastic OS=Hordeum vulgare OX=4513 GN=PSAL PE=1 SV=1
LOC_Os07g05480	1.06789	7.74784e-14	Up	sp|P36886|PSAK_HORVU Photosystem I reaction center subunit psaK, chloroplastic OS=Hordeum vulgare OX=4513 GN=PSAK PE=1 SV=1
LOC_Os05g30700	3.43234	8.16904e-14	Up	--
LOC_Os08g42030	1.50115	8.80929e-14	Up	sp|Q96510|PER35_ARATH Peroxidase 35 OS=Arabidopsis thaliana OX=3702 GN=PER35 PE=1 SV=1
LOC_Os07g46846	4.65466	9.00507e-14	Up	sp|Q7FAE1|MOMAS_ORYSJ Momilactone A synthase OS=Oryza sativa subsp. japonica OX=39947 GN=Os04g0179200 PE=2 SV=1
LOC_Os02g22260	1.24086	9.12083e-14	Up	sp|P43394|K502_ACTDE Fruit protein pKIWI502 OS=Actinidia deliciosa OX=3627 GN=pKIWI502 PE=2 SV=1
LOC_Os12g37260	1.52432	9.29875e-14	Up	sp|P93184|LOX21_HORVU Lipoxygenase 2.1, chloroplastic OS=Hordeum vulgare OX=4513 GN=LOX2.1 PE=1 SV=1
LOC_Os03g59350	1.21148	9.6985e-14	Up	sp|Q2V6J9|UFOG7_FRAAN UDP-glucose flavonoid 3-O-glucosyltransferase 7 OS=Fragaria ananassa OX=3747 GN=GT7 PE=1 SV=1
LOC_Os05g41050	4.72794	1.02991e-13	Up	--
LOC_Os02g36800	1.90155	1.15434e-13	Up	sp|P10978|POLX_TOBAC Retrovirus-related Pol polyprotein from transposon TNT 1-94 OS=Nicotiana tabacum OX=4097 PE=2 SV=1
LOC_Os09g21660	-2.06647	1.20458e-13	Down	--
LOC_Os04g40100	1.63286	1.21534e-13	Up	sp|Q9C9V6|Y1790_ARATH BTB/POZ domain-containing protein At1g67900 OS=Arabidopsis thaliana OX=3702 GN=At1g67900 PE=1 SV=1
LOC_Os07g11370	2.63736	1.27288e-13	Up	--
LOC_Os09g22160	1.34189	1.41015e-13	Up	--
LOC_Os09g24924	1.07501	1.48503e-13	Up	sp|O04249|STP7_ARATH Sugar transport protein 7 OS=Arabidopsis thaliana OX=3702 GN=STP7 PE=1 SV=1
LOC_Os08g32930	1.32304	1.5055e-13	Up	sp|Q94AU9|RBCX1_ARATH Chaperonin-like RBCX protein 1, chloroplastic OS=Arabidopsis thaliana OX=3702 GN=RBCX1 PE=1 SV=1
LOC_Os07g05000	1.01785	1.53469e-13	Up	sp|Q94A68|Y1669_ARATH Uncharacterized oxidoreductase At1g06690, chloroplastic OS=Arabidopsis thaliana OX=3702 GN=At1g06690 PE=1 SV=1
LOC_Os06g16040	4.68807	1.53499e-13	Up	--
LOC_Os03g28300	1.30685	1.74042e-13	Up	sp|Q05609|CTR1_ARATH Serine/threonine-protein kinase CTR1 OS=Arabidopsis thaliana OX=3702 GN=CTR1 PE=1 SV=1
LOC_Os07g12304	-2.96704	1.75738e-13	Down	--
LOC_Os01g72950	1.5201	1.78267e-13	Up	sp|Q9S829|NDHO_ARATH NAD(P)H-quinone oxidoreductase subunit O, chloroplastic OS=Arabidopsis thaliana OX=3702 GN=ndhO PE=2 SV=1
LOC_Os05g13940	1.23835	2.00013e-13	Up	--
LOC_Os12g40650	-2.61961	2.24367e-13	Down	sp|Q9M2U3|ALPL_ARATH Protein ALP1-like OS=Arabidopsis thaliana OX=3702 GN=At3g55350 PE=2 SV=1
LOC_Os02g37300	-2.8378	2.27963e-13	Down	sp|F2VYU4|PIK1_ORYSJ Disease resistance protein Pik-1 OS=Oryza sativa subsp. japonica OX=39947 GN=PIK-1 PE=1 SV=1
LOC_Os01g65130	1.54896	2.31252e-13	Up	sp|Q0WP01|PTR9_ARATH Protein NRT1/ PTR FAMILY 5.10 OS=Arabidopsis thaliana OX=3702 GN=NPF5.10 PE=2 SV=1
LOC_Os05g33840	1.4117	2.67658e-13	Up	sp|O22567|DXS1_ORYSJ 1-deoxy-D-xylulose-5-phosphate synthase 1, chloroplastic OS=Oryza sativa subsp. japonica OX=39947 GN=CLA1 PE=2 SV=2
LOC_Os11g01690	9.23586	2.76951e-13	Up	--
LOC_Os07g33450	3.13752	2.85633e-13	Up	sp|P31843|RRPO_OENBE RNA-directed DNA polymerase homolog OS=Oenothera berteroana OX=3950 PE=4 SV=1
LOC_Os04g10000	4.71853	2.95001e-13	Up	sp|Q7FAE1|MOMAS_ORYSJ Momilactone A synthase OS=Oryza sativa subsp. japonica OX=39947 GN=Os04g0179200 PE=2 SV=1
LOC_Os01g63480	1.8629	2.95069e-13	Up	sp|Q9SND9|Y3028_ARATH Uncharacterized acetyltransferase At3g50280 OS=Arabidopsis thaliana OX=3702 GN=At3g50280 PE=3 SV=1
LOC_Os02g26870	2.37767	3.16189e-13	Up	sp|P10978|POLX_TOBAC Retrovirus-related Pol polyprotein from transposon TNT 1-94 OS=Nicotiana tabacum OX=4097 PE=2 SV=1
LOC_Os03g60100	1.11557	3.55568e-13	Up	sp|Q9M385|RK17_ARATH 50S ribosomal protein L17, chloroplastic OS=Arabidopsis thaliana OX=3702 GN=RPL17 PE=2 SV=1
LOC_Os07g25810	-1.55685	3.6327e-13	Down	--
LOC_Os01g40710	1.20762	3.66911e-13	Up	sp|Q9FEC1|OHP2_ARATH Light-harvesting complex-like protein OHP2, chloroplastic OS=Arabidopsis thaliana OX=3702 GN=OHP2 PE=1 SV=1
LOC_Os04g08350	1.0057	3.78177e-13	Up	sp|Q1KLZ1|CAS2_MALDO L-3-cyanoalanine synthase 2, mitochondrial OS=Malus domestica OX=3750 GN=CAS2 PE=1 SV=1
LOC_Os04g35160	1.73278	3.81304e-13	Up	sp|Q7XQQ1|MRS2D_ORYSJ Putative magnesium transporter MRS2-D OS=Oryza sativa subsp. japonica OX=39947 GN=MRS2-D PE=3 SV=1
LOC_Os05g26500	2.19264	3.9416e-13	Up	sp|P31843|RRPO_OENBE RNA-directed DNA polymerase homolog OS=Oenothera berteroana OX=3950 PE=4 SV=1
LOC_Os01g51400	1.40074	4.35082e-13	Up	sp|Q9C9Y8|Y3868_ARATH Probable inactive receptor kinase At3g08680 OS=Arabidopsis thaliana OX=3702 GN=At3g08680 PE=1 SV=1
LOC_Os03g48760	-2.56506	4.64898e-13	Down	sp|Q851J9|GL34_ORYSJ Putative germin-like protein 3-4 OS=Oryza sativa subsp. japonica OX=39947 GN=Os03g0693800 PE=3 SV=1
LOC_Os03g48750	-1.55387	4.67562e-13	Down	sp|Q851J8|GL33_ORYSJ Germin-like protein 3-3 OS=Oryza sativa subsp. japonica OX=39947 GN=Os03g0693700 PE=2 SV=1
LOC_Os06g21590	1.29634	4.99823e-13	Up	sp|Q9SDM1|CB121_HORVU Chlorophyll a-b binding protein 1B-21, chloroplastic OS=Hordeum vulgare OX=4513 GN=LHC Ib-21 PE=1 SV=1
LOC_Os04g38525	1.06225	5.21947e-13	Up	--
LOC_Os06g47600	-1.15079	5.48826e-13	Down	sp|P50699|TLPH_ARATH Thaumatin-like protein OS=Arabidopsis thaliana OX=3702 GN=At1g18250 PE=2 SV=2
LOC_Os01g61370	1.48543	5.57424e-13	Up	--
LOC_Os04g27670	1.4323	5.64258e-13	Up	sp|Q5GJ59|TPS7_MAIZE Tau-cadinol synthase OS=Zea mays OX=4577 GN=TPS7 PE=1 SV=1
LOC_Os01g05585	-1.42509	5.67203e-13	Down	sp|P94029|MT2A_ORYSJ Metallothionein-like protein 2A OS=Oryza sativa subsp. japonica OX=39947 GN=MT2A PE=2 SV=1
LOC_Os12g40920	1.21824	6.19064e-13	Up	sp|Q99090|CPRF2_PETCR Light-inducible protein CPRF2 OS=Petroselinum crispum OX=4043 GN=CPRF2 PE=2 SV=2
LOC_Os10g38910	1.44285	6.30951e-13	Up	sp|Q9LTD9|Y5278_ARATH Uncharacterized protein PAM68-like OS=Arabidopsis thaliana OX=3702 GN=At5g52780 PE=2 SV=1
LOC_Os03g10100	1.17272	6.50386e-13	Up	sp|Q8VZ80|PLT5_ARATH Polyol transporter 5 OS=Arabidopsis thaliana OX=3702 GN=PLT5 PE=1 SV=2
LOC_Os05g26690	1.23051	6.85382e-13	Up	sp|P0C5E5|PRO7_ORYSI Prolamin PPROL 14E OS=Oryza sativa subsp. indica OX=39946 PE=3 SV=1
LOC_Os01g66850	1.28521	7.64823e-13	Up	sp|Q84JS1|PAE6_ARATH Pectin acetylesterase 6 OS=Arabidopsis thaliana OX=3702 GN=PAE6 PE=2 SV=1
LOC_Os12g36210	-1.25245	7.65894e-13	Down	sp|P01053|ICI2_HORVU Subtilisin-chymotrypsin inhibitor-2A OS=Hordeum vulgare OX=4513 PE=1 SV=2
LOC_Os04g59440	1.28306	8.6823e-13	Up	sp|Q0J8R9|PSBS2_ORYSJ Photosystem II 22 kDa protein 2, chloroplastic OS=Oryza sativa subsp. japonica OX=39947 GN=PSBS2 PE=2 SV=1
LOC_Os10g02470	9.06275	8.89321e-13	Up	sp|W5DYE3|DMS1A_WHEAT Deoxymugineic acid synthase 1-A OS=Triticum aestivum OX=4565 GN=DMAS1-A PE=1 SV=1
LOC_Os09g37330	1.60777	9.17732e-13	Up	sp|B7F8P5|SAU39_ORYSJ Auxin-responsive protein SAUR36 OS=Oryza sativa subsp. japonica OX=39947 GN=SAUR39 PE=2 SV=1
LOC_Os08g07330	1.10355	1.11652e-12	Up	sp|Q2R8L1|RGA5S_ORYSJ Disease resistance protein RGA5 OS=Oryza sativa subsp. japonica OX=39947 GN=RGA5 PE=2 SV=1
LOC_Os12g32850	-1.39034	1.21808e-12	Down	sp|O48958|C71E1_SORBI 4-hydroxyphenylacetaldehyde oxime monooxygenase OS=Sorghum bicolor OX=4558 GN=CYP71E1 PE=1 SV=1
LOC_Os11g10320	4.62114	1.24005e-12	Up	--
LOC_Os07g39350	1.13128	1.2566e-12	Up	sp|Q8VZ80|PLT5_ARATH Polyol transporter 5 OS=Arabidopsis thaliana OX=3702 GN=PLT5 PE=1 SV=2
LOC_Os01g57730	1.22268	1.28839e-12	Up	sp|Q9LXG3|PER56_ARATH Peroxidase 56 OS=Arabidopsis thaliana OX=3702 GN=PER56 PE=2 SV=1
LOC_Os06g29730	2.96197	1.37264e-12	Up	--
LOC_Os06g09610	1.10239	1.41534e-12	Up	sp|P0C5D4|PRXQ_ORYSI Putative peroxiredoxin Q, chloroplastic OS=Oryza sativa subsp. indica OX=39946 GN=OsI_22010 PE=3 SV=1
LOC_Os02g53350	1.4601	1.48955e-12	Up	--
LOC_Os03g12260	1.38404	1.52625e-12	Up	sp|O81117|C94A1_VICSA Cytochrome P450 94A1 OS=Vicia sativa OX=3908 GN=CYP94A1 PE=2 SV=2
LOC_Os04g53050	1.37891	1.55122e-12	Up	sp|Q7XA42|RGA1_SOLBU Putative disease resistance protein RGA1 OS=Solanum bulbocastanum OX=147425 GN=RGA1 PE=2 SV=2
LOC_Os03g22370	1.27901	1.57513e-12	Up	--
LOC_Os02g34270	-4.16849	1.60375e-12	Down	sp|Q70II3|EF110_ARATH Ethylene-responsive transcription factor ERF110 OS=Arabidopsis thaliana OX=3702 GN=ERF110 PE=2 SV=2
LOC_Os03g02570	1.15085	1.90326e-12	Up	sp|Q9FJ82|DAPB3_ARATH Dihydrodipicolinate reductase-like protein CRR1, chloroplastic OS=Arabidopsis thaliana OX=3702 GN=DAPB3 PE=2 SV=1
LOC_Os12g09520	4.37701	2.01396e-12	Up	--
LOC_Os01g73580	2.07043	2.13975e-12	Up	sp|Q5JJV0|INV4_ORYSJ Beta-fructofuranosidase, insoluble isoenzyme 4 OS=Oryza sativa subsp. japonica OX=39947 GN=CIN4 PE=2 SV=1
LOC_Os10g28370	1.69461	2.79006e-12	Up	sp|Q9M7I7|CLH2_ARATH Chlorophyllase-2, chloroplastic OS=Arabidopsis thaliana OX=3702 GN=CLH2 PE=1 SV=1
LOC_Os11g17954	1.42391	2.82922e-12	Up	sp|Q8L727|GSTT2_ARATH Glutathione S-transferase T2 OS=Arabidopsis thaliana OX=3702 GN=GSTT2 PE=2 SV=1
LOC_Os11g15230	-1.12808	2.91719e-12	Down	--
LOC_Os08g37432	-1.37122	3.06116e-12	Down	sp|Q9FKQ1|DTX27_ARATH Protein DETOXIFICATION 27 OS=Arabidopsis thaliana OX=3702 GN=DTX27 PE=2 SV=1
LOC_Os09g19280	2.77819	3.24486e-12	Up	sp|Q2R8L1|RGA5S_ORYSJ Disease resistance protein RGA5 OS=Oryza sativa subsp. japonica OX=39947 GN=RGA5 PE=2 SV=1
LOC_Os08g06530	1.18895	3.33103e-12	Up	sp|Q94BS2|MET1_ARATH Protein MET1, chloroplastic OS=Arabidopsis thaliana OX=3702 GN=MET1 PE=1 SV=1
LOC_Os06g45650	1.22853	3.37339e-12	Up	sp|Q655V4|MAD30_ORYSJ MADS-box transcription factor 30 OS=Oryza sativa subsp. japonica OX=39947 GN=MADS30 PE=2 SV=1
LOC_Os02g13510	1.2063	3.51931e-12	Up	sp|P47735|RLK5_ARATH Receptor-like protein kinase 5 OS=Arabidopsis thaliana OX=3702 GN=RLK5 PE=1 SV=1
LOC_Os08g38710	1.18684	3.7089e-12	Up	sp|Q84VX0|RFS1_ARATH Probable galactinol--sucrose galactosyltransferase 1 OS=Arabidopsis thaliana OX=3702 GN=RFS1 PE=2 SV=1
LOC_Os01g50520	2.82998	4.00836e-12	Up	sp|B9DFU2|MAX1_ARATH Cytochrome P450 711A1 OS=Arabidopsis thaliana OX=3702 GN=CYP711A1 PE=2 SV=1
LOC_Os03g57220	1.10963	4.64805e-12	Up	sp|B8AKX6|GLO1_ORYSI Peroxisomal (S)-2-hydroxy-acid oxidase GLO1 OS=Oryza sativa subsp. indica OX=39946 GN=GLO1 PE=3 SV=1
LOC_Os12g08760	-1.34665	4.87053e-12	Down	sp|O49290|CPPM_ARATH Carboxyvinyl-carboxyphosphonate phosphorylmutase, chloroplastic OS=Arabidopsis thaliana OX=3702 GN=At1g77060 PE=1 SV=2
LOC_Os08g04290	1.62914	5.09555e-12	Up	sp|Q6ZJW8|FIE1_ORYSJ Polycomb group protein FIE1 OS=Oryza sativa subsp. japonica OX=39947 GN=FIE1 PE=1 SV=1
LOC_Os03g39610	1.14425	5.17214e-12	Up	sp|A2XJ35|CB23_ORYSI Chlorophyll a-b binding protein, chloroplastic OS=Oryza sativa subsp. indica OX=39946 GN=OsI_012078 PE=2 SV=1
LOC_Os03g36540	1.13364	5.48144e-12	Up	sp|Q53RM0|CHLI_ORYSJ Magnesium-chelatase subunit ChlI, chloroplastic OS=Oryza sativa subsp. japonica OX=39947 GN=CHLI PE=1 SV=1
LOC_Os11g21804	1.0223	5.62085e-12	Up	sp|Q84MD2|CIF1_ARATH Protein CASPARIAN STRIP INTEGRITY FACTOR 1 OS=Arabidopsis thaliana OX=3702 GN=CIF1 PE=1 SV=1
LOC_Os11g43700	1.37733	5.77617e-12	Up	sp|Q2R8L1|RGA5S_ORYSJ Disease resistance protein RGA5 OS=Oryza sativa subsp. japonica OX=39947 GN=RGA5 PE=2 SV=1
LOC_Os07g23340	1.42398	6.0306e-12	Up	sp|Q39152|FACR1_ARATH Fatty acyl-CoA reductase 1 OS=Arabidopsis thaliana OX=3702 GN=FAR1 PE=1 SV=1
LOC_Os02g51930	-1.11987	6.3597e-12	Down	sp|F8WKW1|UGT2_GARJA 7-deoxyloganetin glucosyltransferase OS=Gardenia jasminoides OX=114476 GN=UGT85A24 PE=1 SV=1
LOC_Os07g11350	8.79967	6.37779e-12	Up	--
LOC_Os04g58860	1.00743	6.3879e-12	Up	sp|Q9SRN0|NHL1_ARATH NDR1/HIN1-like protein 1 OS=Arabidopsis thaliana OX=3702 GN=NHL1 PE=2 SV=1
LOC_Os02g57620	1.56904	6.63505e-12	Up	sp|Q10SY9|LSI2_ORYSJ Silicon efflux transporter LSI2 OS=Oryza sativa subsp. japonica OX=39947 GN=LSI2 PE=1 SV=1
LOC_Os01g32864	2.13591	6.82619e-12	Up	--
LOC_Os01g02060	-1.33343	6.96284e-12	Down	sp|Q5PP26|PII2_ARATH Piriformospora indica-insensitive protein 2 OS=Arabidopsis thaliana OX=3702 GN=PII-2 PE=2 SV=1
LOC_Os11g29720	1.72532	7.13187e-12	Up	sp|Q9LMX7|C78A5_ARATH Cytochrome P450 78A5 OS=Arabidopsis thaliana OX=3702 GN=CYP78A5 PE=2 SV=1
LOC_Os08g42710	2.36429	9.17735e-12	Up	sp|P0DO07|PIK2_ORYSJ Disease resistance protein Pik-2 OS=Oryza sativa subsp. japonica OX=39947 GN=PIK-2 PE=3 SV=1
LOC_Os08g42100	1.19232	1.04368e-11	Up	sp|Q8LJW3|ACR4_ARATH ACT domain-containing protein ACR4 OS=Arabidopsis thaliana OX=3702 GN=ACR4 PE=2 SV=1
LOC_Os12g08770	1.09192	1.06639e-11	Up	sp|P31093|PSAN_HORVU Photosystem I reaction center subunit N, chloroplastic OS=Hordeum vulgare OX=4513 GN=PSAN PE=2 SV=1
LOC_Os04g12190	-8.70962	1.14073e-11	Down	--
LOC_Os03g15990	1.6286	1.16649e-11	Up	sp|F4K3G5|EDM2_ARATH Protein ENHANCED DOWNY MILDEW 2 OS=Arabidopsis thaliana OX=3702 GN=EDM2 PE=1 SV=1
LOC_Os01g58320	-1.7536	1.22588e-11	Down	--
LOC_Os11g01610	1.69133	1.25567e-11	Up	sp|Q9FLB6|PR1B3_ARATH PRA1 family protein B3 OS=Arabidopsis thaliana OX=3702 GN=PRA1B3 PE=1 SV=1
LOC_Os01g59200	1.00857	1.29601e-11	Up	sp|O22227|MIZ1_ARATH Protein MIZU-KUSSEI 1 OS=Arabidopsis thaliana OX=3702 GN=MIZ1 PE=1 SV=1
LOC_Os01g66544	-1.27775	1.41132e-11	Down	--
LOC_Os01g52500	1.20421	1.43734e-11	Up	sp|P51615|MAOX_VITVI NADP-dependent malic enzyme OS=Vitis vinifera OX=29760 PE=2 SV=1
LOC_Os08g01940	1.78463	1.44203e-11	Up	--
LOC_Os03g01260	-1.01302	1.51561e-11	Down	sp|Q10T32|EXPB8_ORYSJ Expansin-B8 OS=Oryza sativa subsp. japonica OX=39947 GN=EXPB8 PE=2 SV=1
LOC_Os07g23410	5.72715	1.7624e-11	Up	sp|A3F5L3|DES2_SORBI Fatty acid desaturase DES2 OS=Sorghum bicolor OX=4558 GN=DES2 PE=2 SV=1
LOC_Os03g05334	-1.64304	1.76753e-11	Down	--
LOC_Os08g20420	-1.0902	1.77561e-11	Down	sp|Q6UTZ2|MGDG2_ORYSJ Probable monogalactosyldiacylglycerol synthase 2, chloroplastic OS=Oryza sativa subsp. japonica OX=39947 GN=MGD2 PE=2 SV=2
LOC_Os02g36110	4.39749	1.79042e-11	Up	sp|Q69X58|C76M7_ORYSJ Ent-cassadiene C11-alpha-hydroxylase 1 OS=Oryza sativa subsp. japonica OX=39947 GN=CYP76M7 PE=1 SV=1
LOC_Os11g33270	-1.67127	2.04744e-11	Down	sp|Q41542|XTH_WHEAT Probable xyloglucan endotransglucosylase/hydrolase OS=Triticum aestivum OX=4565 GN=XTH PE=2 SV=1
LOC_Os11g10710	1.53889	2.08137e-11	Up	sp|O23082|Y4960_ARATH Putative receptor-like protein kinase At4g00960 OS=Arabidopsis thaliana OX=3702 GN=At4g00960 PE=3 SV=2
LOC_Os07g12340	-1.56637	2.21971e-11	Down	sp|Q7EZT1|NAC67_ORYSJ NAC domain-containing protein 67 OS=Oryza sativa subsp. japonica OX=39947 GN=NAC067 PE=2 SV=1
LOC_Os05g20954	1.52698	2.21971e-11	Up	--
LOC_Os01g43760	1.62488	2.31854e-11	Up	sp|H2DH21|C7A29_PANGI Cytochrome P450 CYP72A219 OS=Panax ginseng OX=4054 PE=2 SV=1
LOC_Os10g40620	1.80742	2.3699e-11	Up	sp|Q1PE51|QWRF7_ARATH QWRF motif-containing protein 7 OS=Arabidopsis thaliana OX=3702 GN=QWRF7 PE=2 SV=1
LOC_Os02g51570	1.69464	2.74312e-11	Up	sp|Q9SCY3|PNSL4_ARATH Photosynthetic NDH subunit of lumenal location 4, chloroplastic OS=Arabidopsis thaliana OX=3702 GN=PNSL4 PE=1 SV=1
LOC_Os03g36750	1.09713	3.05463e-11	Up	sp|Q94K71|CBBY_ARATH CBBY-like protein OS=Arabidopsis thaliana OX=3702 GN=CBBY PE=1 SV=1
LOC_Os02g50730	-1.31388	3.37089e-11	Down	sp|O04529|2MMP_ARATH Metalloendoproteinase 2-MMP OS=Arabidopsis thaliana OX=3702 GN=2MMP PE=1 SV=1
LOC_Os05g19910	1.35419	3.4002e-11	Up	sp|Q0DJH7|AT5_ORYSJ Acyl transferase 5 OS=Oryza sativa subsp. japonica OX=39947 GN=AT5 PE=2 SV=1
LOC_Os11g45040	3.80488	3.52658e-11	Up	--
LOC_Os03g40194	1.04396	3.95514e-11	Up	sp|Q7XA40|RGA3_SOLBU Putative disease resistance protein RGA3 OS=Solanum bulbocastanum OX=147425 GN=RGA3 PE=2 SV=2
LOC_Os04g38550	1.20008	4.11934e-11	Up	--
LOC_Os03g57980	1.44535	4.19334e-11	Up	sp|Q9LZH5|LTPG2_ARATH Non-specific lipid transfer protein GPI-anchored 2 OS=Arabidopsis thaliana OX=3702 GN=LTPG2 PE=2 SV=1
LOC_Os03g17070	1.09177	4.20512e-11	Up	sp|P31853|ATPX_SPIOL ATP synthase subunit b', chloroplastic OS=Spinacia oleracea OX=3562 GN=ATPG PE=1 SV=2
LOC_Os10g42960	1.05131	4.21808e-11	Up	sp|Q7XBS0|DUR3_ORYSJ Urea-proton symporter DUR3 OS=Oryza sativa subsp. japonica OX=39947 GN=DUR3 PE=1 SV=1
LOC_Os02g05890	1.69648	4.2739e-11	Up	sp|Q0E3V2|YL1_ORYSJ Protein YELLOW LEAF 1, choloroplastic OS=Oryza sativa subsp. japonica OX=39947 GN=YL1 PE=1 SV=1
LOC_Os07g49120	-1.36118	4.35592e-11	Down	sp|P50160|TS2_MAIZE Sex determination protein tasselseed-2 OS=Zea mays OX=4577 GN=TS2 PE=2 SV=1
LOC_Os11g40340	-5.49992	4.46175e-11	Down	--
LOC_Os07g09020	1.4955	4.5966e-11	Up	sp|Q6Z4F1|AGO14_ORYSJ Protein argonaute 14 OS=Oryza sativa subsp. japonica OX=39947 GN=AGO14 PE=2 SV=1
LOC_Os03g05640	-2.04545	4.85675e-11	Down	sp|Q8GSD9|PHT12_ORYSJ Inorganic phosphate transporter 1-2 OS=Oryza sativa subsp. japonica OX=39947 GN=PTH1-2 PE=2 SV=1
LOC_Os10g02240	1.0481	5.05787e-11	Up	sp|P46032|PTR2_ARATH Protein NRT1/ PTR FAMILY 8.3 OS=Arabidopsis thaliana OX=3702 GN=NPF8.3 PE=1 SV=1
LOC_Os09g18594	2.02513	5.78178e-11	Up	sp|O64483|SIRK_ARATH Senescence-induced receptor-like serine/threonine-protein kinase OS=Arabidopsis thaliana OX=3702 GN=SIRK PE=1 SV=1
LOC_Os12g41560	2.55638	6.09994e-11	Up	sp|A2YVF1|TIF6A_ORYSI Protein TIFY 6a OS=Oryza sativa subsp. indica OX=39946 GN=TIFY6A PE=3 SV=1
LOC_Os03g55720	1.14751	6.18777e-11	Up	sp|P80883|PETM_SPIOL Cytochrome b6-f complex subunit 7 (Fragment) OS=Spinacia oleracea OX=3562 GN=petM PE=1 SV=1
LOC_Os04g53120	1.49708	6.26285e-11	Up	sp|Q7XA39|RGA4_SOLBU Putative disease resistance protein RGA4 OS=Solanum bulbocastanum OX=147425 GN=RGA4 PE=2 SV=1
LOC_Os07g23120	1.35361	6.72343e-11	Up	sp|Q9XIP8|CDI_ARATH Protein CDI OS=Arabidopsis thaliana OX=3702 GN=CDI PE=2 SV=1
LOC_Os06g10510	1.23485	6.91169e-11	Up	--
LOC_Os02g51020	2.43787	7.4649e-11	Up	sp|Q8RXS1|PNSB4_ARATH Photosynthetic NDH subunit of subcomplex B 4, chloroplastic OS=Arabidopsis thaliana OX=3702 GN=PNSB4 PE=2 SV=1
LOC_Os03g47110	-1.48286	7.52655e-11	Down	--
LOC_Os11g07980	1.33995	7.61475e-11	Up	--
LOC_Os09g30454	1.32748	7.65664e-11	Up	sp|Q9LMP1|WAK2_ARATH Wall-associated receptor kinase 2 OS=Arabidopsis thaliana OX=3702 GN=WAK2 PE=1 SV=1
LOC_Os01g59000	1.34007	8.00637e-11	Up	sp|Q9FMV7|C94B1_ARATH Cytochrome P450 94B1 OS=Arabidopsis thaliana OX=3702 GN=CYP94B1 PE=1 SV=1
LOC_Os11g41600	1.28075	8.34177e-11	Up	--
LOC_Os05g22614	1.05583	9.62656e-11	Up	sp|Q9STF2|PTA16_ARATH Protein PLASTID TRANSCRIPTIONALLY ACTIVE 16, chloroplastic OS=Arabidopsis thaliana OX=3702 GN=PTAC16 PE=1 SV=1
LOC_Os05g37130	1.14127	1.00659e-10	Up	sp|Q9ZQG9|E1314_ARATH Glucan endo-1,3-beta-glucosidase 14 OS=Arabidopsis thaliana OX=3702 GN=At2g27500 PE=2 SV=2
LOC_Os12g05700	-2.08466	1.01242e-10	Down	sp|Q9SSQ4|FRS6_ARATH Protein FAR1-RELATED SEQUENCE 6 OS=Arabidopsis thaliana OX=3702 GN=FRS6 PE=2 SV=1
LOC_Os11g17504	1.86162	1.12995e-10	Up	sp|Q9ZT66|E134_MAIZE Endo-1,3;1,4-beta-D-glucanase OS=Zea mays OX=4577 PE=1 SV=1
LOC_Os11g04720	1.80931	1.30893e-10	Up	sp|Q4GZK2|ORR9_ORYSI Two-component response regulator ORR9 OS=Oryza sativa subsp. indica OX=39946 GN=RR9 PE=2 SV=1
LOC_Os04g38400	-1.15714	1.36828e-10	Down	sp|Q9FJQ5|EIL5_ARATH ETHYLENE INSENSITIVE 3-like 5 protein OS=Arabidopsis thaliana OX=3702 GN=EIL5 PE=2 SV=1
LOC_Os03g13130	-1.06446	1.4706e-10	Down	--
LOC_Os10g13970	3.41852	1.47699e-10	Up	sp|C0LGP4|Y3475_ARATH Probable LRR receptor-like serine/threonine-protein kinase At3g47570 OS=Arabidopsis thaliana OX=3702 GN=At3g47570 PE=2 SV=1
LOC_Os06g51460	1.06904	1.48786e-10	Up	sp|Q9FF46|AB28G_ARATH ABC transporter G family member 28 OS=Arabidopsis thaliana OX=3702 GN=ABCG28 PE=3 SV=1
LOC_Os08g03200	8.3361	1.5568e-10	Up	sp|Q9LXA5|LRK91_ARATH L-type lectin-domain containing receptor kinase IX.1 OS=Arabidopsis thaliana OX=3702 GN=LECRK91 PE=1 SV=1
LOC_Os03g40400	-1.30475	1.68952e-10	Down	sp|Q9LX30|GCN2_ARATH eIF-2-alpha kinase GCN2 OS=Arabidopsis thaliana OX=3702 GN=GCN2 PE=2 SV=2
LOC_Os08g41040	1.55974	1.72072e-10	Up	--
LOC_Os06g51050	1.58752	1.78498e-10	Up	sp|P24626|CHI3_ORYSJ Chitinase 3 OS=Oryza sativa subsp. japonica OX=39947 GN=Cht3 PE=2 SV=2
LOC_Os06g28194	2.97235	1.80099e-10	Up	--
LOC_Os02g36619	1.06311	1.8077e-10	Up	sp|Q9LZD3|E70A1_ARATH Exocyst complex component EXO70A1 OS=Arabidopsis thaliana OX=3702 GN=EXO70A1 PE=1 SV=1
LOC_Os07g18240	1.22502	1.83708e-10	Up	sp|Q7XUN6|SIT2_ORYSJ L-type lectin-domain containing receptor kinase SIT2 OS=Oryza sativa subsp. japonica OX=39947 GN=SIT2 PE=2 SV=2
LOC_Os01g50100	1.56278	1.84747e-10	Up	sp|Q9FWX7|AB11B_ARATH ABC transporter B family member 11 OS=Arabidopsis thaliana OX=3702 GN=ABCB11 PE=2 SV=1
LOC_Os09g29690	2.49844	1.9579e-10	Up	sp|Q9ZP41|EGC_CITJA EG45-like domain containing protein OS=Citrus jambhiri OX=64884 GN=CjBAp12 PE=1 SV=1
LOC_Os09g36040	1.11768	2.0568e-10	Up	sp|Q94A65|STR14_ARATH Rhodanese-like domain-containing protein 14, chloroplastic OS=Arabidopsis thaliana OX=3702 GN=At4g27700 PE=2 SV=1
LOC_Os03g53710	1.30286	2.38343e-10	Up	sp|Q9C503|NDF5_ARATH Protein NDH-DEPENDENT CYCLIC ELECTRON FLOW 5 OS=Arabidopsis thaliana OX=3702 GN=NDF5 PE=2 SV=1
LOC_Os09g02270	1.43475	2.44969e-10	Up	sp|Q6YX89|CYL4_ORYSJ Cyclase-like protein 4 OS=Oryza sativa subsp. japonica OX=39947 GN=CYL4 PE=2 SV=1
LOC_Os04g58190	1.12079	2.53508e-10	Up	sp|Q9FGD6|DOF58_ARATH Dof zinc finger protein DOF5.8 OS=Arabidopsis thaliana OX=3702 GN=DOF5.8 PE=2 SV=1
LOC_Os05g35470	1.20915	2.55848e-10	Up	sp|Q9ZT66|E134_MAIZE Endo-1,3;1,4-beta-D-glucanase OS=Zea mays OX=4577 PE=1 SV=1
LOC_Os08g40910	-1.94584	2.56014e-10	Down	--
LOC_Os12g04500	1.53743	2.62906e-10	Up	sp|B8BLZ4|ORR10_ORYSI Two-component response regulator ORR10 OS=Oryza sativa subsp. indica OX=39946 GN=RR10 PE=2 SV=1
LOC_Os04g10010	3.8276	2.94564e-10	Up	sp|Q7FAE1|MOMAS_ORYSJ Momilactone A synthase OS=Oryza sativa subsp. japonica OX=39947 GN=Os04g0179200 PE=2 SV=1
LOC_Os11g42610	1.94781	3.25352e-10	Up	--
LOC_Os06g37224	3.9693	3.33487e-10	Up	sp|Q5Z5S6|C7019_ORYSJ Ent-kaurene oxidase-like 5 OS=Oryza sativa subsp. japonica OX=39947 GN=CYP701A9 PE=2 SV=1
LOC_Os05g13800	7.05741	3.36635e-10	Up	--
LOC_Os01g45110	-1.86201	3.38257e-10	Down	sp|Q8H0F2|ANGT_GENTR Anthocyanin 3'-O-beta-glucosyltransferase OS=Gentiana triflora OX=55190 PE=1 SV=1
LOC_Os03g18960	1.35726	3.50658e-10	Up	sp|Q0WVV6|CB60D_ARATH Calmodulin-binding protein 60 D OS=Arabidopsis thaliana OX=3702 GN=CBP60D PE=2 SV=1
LOC_Os03g16610	-2.06752	3.59159e-10	Down	sp|Q10ND7|LAC10_ORYSJ Laccase-10 OS=Oryza sativa subsp. japonica OX=39947 GN=LAC10 PE=2 SV=1
LOC_Os09g10300	2.46354	3.77669e-10	Up	sp|Q9LNT9|ASK4_ARATH SKP1-like protein 4 OS=Arabidopsis thaliana OX=3702 GN=ASK4 PE=1 SV=1
LOC_Os11g32980	8.17457	4.29907e-10	Up	sp|Q9LNG5|PPP7L_ARATH Serine/threonine-protein phosphatase 7 long form homolog OS=Arabidopsis thaliana OX=3702 GN=MAIL3 PE=2 SV=1
LOC_Os11g12410	1.68883	4.38782e-10	Up	sp|Q53Q31|SPZ6A_ORYSJ Putative serpin-Z6A OS=Oryza sativa subsp. japonica OX=39947 GN=Os11g0230400 PE=3 SV=2
LOC_Os03g52130	1.30168	4.63943e-10	Up	--
LOC_Os05g03530	1.15524	4.83482e-10	Up	sp|Q9C7C1|TET6_ARATH Tetraspanin-6 OS=Arabidopsis thaliana OX=3702 GN=TET6 PE=2 SV=1
LOC_Os04g45810	-1.22342	5.12249e-10	Down	sp|Q01IK0|HOX22_ORYSI Homeobox-leucine zipper protein HOX22 OS=Oryza sativa subsp. indica OX=39946 GN=HOX22 PE=2 SV=2
LOC_Os05g35010	1.89143	5.5528e-10	Up	sp|Q43257|C71C4_MAIZE indole-2-monooxygenase OS=Zea mays OX=4577 GN=CYP71C4 PE=1 SV=1
LOC_Os04g41340	1.19389	5.6085e-10	Up	sp|P0DKC3|PGP1A_ARATH Phosphoglycolate phosphatase 1A, chloroplastic OS=Arabidopsis thaliana OX=3702 GN=PGLP1A PE=1 SV=1
LOC_Os12g29570	2.11238	5.61318e-10	Up	sp|O81208|OHP1_ARATH Light-harvesting complex-like protein OHP1, chloroplastic OS=Arabidopsis thaliana OX=3702 GN=OHP1 PE=1 SV=1
LOC_Os01g38359	3.89297	5.73032e-10	Up	sp|Q9FJL3|FKB65_ARATH Peptidyl-prolyl cis-trans isomerase FKBP65 OS=Arabidopsis thaliana OX=3702 GN=FKBP65 PE=1 SV=1
LOC_Os06g44460	1.21595	5.93113e-10	Up	sp|O49485|SERA1_ARATH D-3-phosphoglycerate dehydrogenase 1, chloroplastic OS=Arabidopsis thaliana OX=3702 GN=PGDH1 PE=1 SV=1
LOC_Os01g72330	1.54036	6.28756e-10	Up	sp|Q4GZK7|ORR4_ORYSI Two-component response regulator ORR4 OS=Oryza sativa subsp. indica OX=39946 GN=RR4 PE=2 SV=1
LOC_Os09g28550	3.10974	6.77272e-10	Up	sp|Q67J19|BKI1_ORYSJ Probable BRI1 kinase inhibitor 1 OS=Oryza sativa subsp. japonica OX=39947 GN=BKI1 PE=1 SV=1
LOC_Os05g33280	1.42058	7.75835e-10	Up	sp|A2Y4G9|U603_ORYSI UPF0603 protein OsI_019212, chloroplastic OS=Oryza sativa subsp. indica OX=39946 GN=OsI_19898 PE=3 SV=2
LOC_Os12g03740	1.77392	7.88518e-10	Up	sp|Q9ZVQ6|P2B10_ARATH F-box protein PP2-B10 OS=Arabidopsis thaliana OX=3702 GN=PP2B10 PE=1 SV=1
LOC_Os06g22760	-1.38226	8.18276e-10	Down	sp|Q4PSU4|AGL61_ARATH Agamous-like MADS-box protein AGL61 OS=Arabidopsis thaliana OX=3702 GN=AGL61 PE=1 SV=1
LOC_Os07g38230	1.05923	8.2286e-10	Up	sp|Q8L9X2|RBCX2_ARATH Chaperonin-like RbcX protein 2, chloroplastic OS=Arabidopsis thaliana OX=3702 GN=RBCX2 PE=1 SV=1
LOC_Os09g26810	2.09559	1.03769e-09	Up	sp|Q8LCQ4|LHCA6_ARATH Photosystem I chlorophyll a/b-binding protein 6, chloroplastic OS=Arabidopsis thaliana OX=3702 GN=LHCA6 PE=1 SV=1
LOC_Os10g05710	2.89596	1.06318e-09	Up	sp|P10978|POLX_TOBAC Retrovirus-related Pol polyprotein from transposon TNT 1-94 OS=Nicotiana tabacum OX=4097 PE=2 SV=1
LOC_Os04g07590	2.33795	1.10726e-09	Up	--
LOC_Os04g03210	5.35427	1.13184e-09	Up	sp|C0LGP4|Y3475_ARATH Probable LRR receptor-like serine/threonine-protein kinase At3g47570 OS=Arabidopsis thaliana OX=3702 GN=At3g47570 PE=2 SV=1
LOC_Os06g45470	1.01041	1.14001e-09	Up	--
LOC_Os07g35510	1.32562	1.1771e-09	Up	sp|Q8VYE5|E1312_ARATH Glucan endo-1,3-beta-glucosidase 12 OS=Arabidopsis thaliana OX=3702 GN=At4g29360 PE=2 SV=1
LOC_Os06g09310	-1.17437	1.25911e-09	Down	sp|P0C035|ATL60_ARATH RING-H2 finger protein ATL60 OS=Arabidopsis thaliana OX=3702 GN=ATL60 PE=2 SV=1
LOC_Os07g10850	1.56236	1.31326e-09	Up	sp|P10978|POLX_TOBAC Retrovirus-related Pol polyprotein from transposon TNT 1-94 OS=Nicotiana tabacum OX=4097 PE=2 SV=1
LOC_Os06g15750	7.99171	1.38266e-09	Up	sp|Q7XBQ9|RGA2_SOLBU Disease resistance protein RGA2 OS=Solanum bulbocastanum OX=147425 GN=RGA2 PE=1 SV=1
LOC_Os08g39650	7.9883	1.3987e-09	Up	sp|P31843|RRPO_OENBE RNA-directed DNA polymerase homolog OS=Oenothera berteroana OX=3950 PE=4 SV=1
LOC_Os04g40140	1.46296	1.40092e-09	Up	sp|Q6NQK2|NAC8_ARATH SUPPRESSOR OF GAMMA RESPONSE 1 OS=Arabidopsis thaliana OX=3702 GN=SOG1 PE=1 SV=1
LOC_Os09g35010	-2.87395	1.52468e-09	Down	sp|Q3T5N4|DRE1B_ORYSJ Dehydration-responsive element-binding protein 1B OS=Oryza sativa subsp. japonica OX=39947 GN=DREB1B PE=2 SV=1
LOC_Os07g03710	2.53029	1.57895e-09	Up	sp|P35793|PR13_HORVU Pathogenesis-related protein PRB1-3 OS=Hordeum vulgare OX=4513 PE=2 SV=1
LOC_Os01g70870	2.18919	1.60716e-09	Up	sp|Q9SCQ6|IDD2_ARATH Zinc finger protein GAI-ASSOCIATED FACTOR 1 OS=Arabidopsis thaliana OX=3702 GN=GAF1 PE=1 SV=1
LOC_Os03g55740	1.23406	1.69615e-09	Up	sp|A2XMB2|PROA_ORYSI 10 kDa prolamin OS=Oryza sativa subsp. indica OX=39946 GN=OsI_013205 PE=2 SV=2
LOC_Os11g27329	-1.66425	1.74401e-09	Down	sp|Q9SQX6|SCP7_ARATH Serine carboxypeptidase-like 7 OS=Arabidopsis thaliana OX=3702 GN=SCPL7 PE=2 SV=1
LOC_Os01g07420	1.26315	1.77102e-09	Up	--
LOC_Os12g02960	1.0005	1.78848e-09	Up	sp|Q9FQA3|GST23_MAIZE Glutathione transferase GST 23 OS=Zea mays OX=4577 PE=2 SV=1
LOC_Os09g12630	3.91671	1.81065e-09	Up	--
LOC_Os11g06980	1.51533	1.87151e-09	Up	sp|B9G9L9|BURPH_ORYSJ BURP domain-containing protein 17 OS=Oryza sativa subsp. japonica OX=39947 GN=BURP17 PE=2 SV=1
LOC_Os07g18990	1.67564	1.89098e-09	Up	sp|Q8W453|DIRL1_ARATH Putative lipid-transfer protein DIR1 OS=Arabidopsis thaliana OX=3702 GN=DIR1 PE=1 SV=1
LOC_Os02g30290	5.20894	2.00673e-09	Up	sp|Q9SK32|MAIL1_ARATH Protein MAIN-LIKE 1 OS=Arabidopsis thaliana OX=3702 GN=MAIL1 PE=2 SV=1
LOC_Os03g43130	7.97282	2.22578e-09	Up	--
LOC_Os04g50110	1.37006	2.23471e-09	Up	sp|P19683|ROC4_NICSY 31 kDa ribonucleoprotein, chloroplastic OS=Nicotiana sylvestris OX=4096 PE=1 SV=1
LOC_Os11g15624	1.82842	2.42713e-09	Up	--
LOC_Os07g23640	1.30868	2.53289e-09	Up	--
LOC_Os04g30240	1.38978	3.19135e-09	Up	sp|Q9LMP1|WAK2_ARATH Wall-associated receptor kinase 2 OS=Arabidopsis thaliana OX=3702 GN=WAK2 PE=1 SV=1
LOC_Os04g45090	1.62445	3.35644e-09	Up	sp|Q7XMK3|ACET2_ORYSJ Probable ascorbate-specific transmembrane electron transporter 2 OS=Oryza sativa subsp. japonica OX=39947 GN=Os04g0533500 PE=2 SV=2
LOC_Os01g73005	1.14836	3.55028e-09	Up	--
LOC_Os10g39150	1.16138	3.91217e-09	Up	sp|Q8LCA1|CUT1B_ARATH Protein CURVATURE THYLAKOID 1B, chloroplastic OS=Arabidopsis thaliana OX=3702 GN=CURT1B PE=1 SV=2
LOC_Os11g30500	1.06445	3.94693e-09	Up	sp|Q07764|HVA22_HORVU Protein HVA22 OS=Hordeum vulgare OX=4513 GN=HVA22 PE=2 SV=1
LOC_Os01g49030	1.06296	4.74672e-09	Up	--
LOC_Os08g30014	-1.54488	4.76879e-09	Down	NA
LOC_Os01g49240	-1.54845	4.82977e-09	Down	sp|V5LLZ9|GGT_QUERO Gallate 1-beta-glucosyltransferase OS=Quercus robur OX=38942 GN=UGT84A13 PE=1 SV=1
LOC_Os02g40200	2.11087	4.86823e-09	Up	sp|C0LGP4|Y3475_ARATH Probable LRR receptor-like serine/threonine-protein kinase At3g47570 OS=Arabidopsis thaliana OX=3702 GN=At3g47570 PE=2 SV=1
LOC_Os01g57004	-2.55376	5.01797e-09	Down	--
LOC_Os05g30280	1.32016	5.07512e-09	Up	sp|B9FHH2|BGL20_ORYSJ Beta-glucosidase 20 OS=Oryza sativa subsp. japonica OX=39947 GN=BGLU20 PE=2 SV=1
LOC_Os02g46180	1.87471	5.38542e-09	Up	sp|Q8VZM9|FLZ2_ARATH FCS-Like Zinc finger 2 OS=Arabidopsis thaliana OX=3702 GN=FLZ2 PE=1 SV=1
LOC_Os03g04060	2.44958	5.48029e-09	Up	sp|Q10S66|CHI11_ORYSJ Chitinase 11 OS=Oryza sativa subsp. japonica OX=39947 GN=Cht11 PE=2 SV=1
LOC_Os11g31000	2.83583	5.91041e-09	Up	--
LOC_Os02g33410	1.62926	6.20567e-09	Up	--
LOC_Os05g25430	2.72443	6.25622e-09	Up	sp|Q9SCZ4|FERON_ARATH Receptor-like protein kinase FERONIA OS=Arabidopsis thaliana OX=3702 GN=FER PE=1 SV=1
LOC_Os07g44130	1.13473	7.1952e-09	Up	sp|F4IK45|C70B2_ARATH Cytochrome P450 709B2 OS=Arabidopsis thaliana OX=3702 GN=CYP709B2 PE=2 SV=1
LOC_Os07g46852	2.68343	7.23728e-09	Up	sp|Q7FAE1|MOMAS_ORYSJ Momilactone A synthase OS=Oryza sativa subsp. japonica OX=39947 GN=Os04g0179200 PE=2 SV=1
LOC_Os07g33580	1.18702	7.78439e-09	Up	sp|Q50EK1|C16B1_PICSI Cytochrome P450 716B1 OS=Picea sitchensis OX=3332 GN=CYP716B1 PE=2 SV=1
LOC_Os06g45184	-1.41491	7.858e-09	Down	--
LOC_Os08g17390	1.18101	7.95221e-09	Up	sp|Q9S9N6|PNSB1_ARATH Photosynthetic NDH subunit of subcomplex B 1, chloroplastic OS=Arabidopsis thaliana OX=3702 GN=PNSB1 PE=2 SV=1
LOC_Os04g38660	-4.06242	8.16489e-09	Down	sp|F4J1Q9|AVT1I_ARATH Amino acid transporter AVT1I OS=Arabidopsis thaliana OX=3702 GN=AVT1I PE=3 SV=1
LOC_Os07g15940	3.38166	8.84287e-09	Up	sp|Q7XUN6|SIT2_ORYSJ L-type lectin-domain containing receptor kinase SIT2 OS=Oryza sativa subsp. japonica OX=39947 GN=SIT2 PE=2 SV=2
LOC_Os08g04580	7.72285	9.14364e-09	Up	--
LOC_Os11g29970	1.80402	9.32e-09	Up	sp|Q9LRR4|R13L1_ARATH Putative disease resistance RPP13-like protein 1 OS=Arabidopsis thaliana OX=3702 GN=RPPL1 PE=3 SV=1
LOC_Os07g26900	1.59186	1.15715e-08	Up	sp|Q9FT97|AGAL1_ARATH Alpha-galactosidase 1 OS=Arabidopsis thaliana OX=3702 GN=AGAL1 PE=2 SV=1
LOC_Os03g46150	1.79315	1.16523e-08	Up	--
LOC_Os11g35450	1.78524	1.1882e-08	Up	sp|Q6JN47|EIX1_SOLLC Receptor-like protein EIX1 OS=Solanum lycopersicum OX=4081 GN=EIX1 PE=2 SV=2
LOC_Os10g09090	5.14218	1.20358e-08	Up	sp|Q8VWZ7|C76B6_CATRO Geraniol 8-hydroxylase OS=Catharanthus roseus OX=4058 GN=CYP76B6 PE=1 SV=1
LOC_Os02g37440	1.44252	1.31433e-08	Up	--
LOC_Os04g17820	1.33208	1.36576e-08	Up	--
LOC_Os02g21320	1.69963	1.36911e-08	Up	sp|Q84P97|VDAC5_ORYSJ Mitochondrial outer membrane protein porin 5 OS=Oryza sativa subsp. japonica OX=39947 GN=VDAC5 PE=2 SV=1
LOC_Os03g18710	1.26302	1.42044e-08	Up	sp|Q5XPJ9|SCAR2_ARATH Protein SCAR2 OS=Arabidopsis thaliana OX=3702 GN=SCAR2 PE=1 SV=1
LOC_Os12g11550	6.56841	1.44653e-08	Up	--
LOC_Os08g16900	2.71634	1.44936e-08	Up	--
LOC_Os09g28130	1.08016	1.48305e-08	Up	sp|Q9FYE3|ATCA3_ARATH Alpha carbonic anhydrase 3 OS=Arabidopsis thaliana OX=3702 GN=ACA3 PE=2 SV=1
LOC_Os01g46860	2.98479	1.55998e-08	Up	sp|Q94DB8|PT111_ORYSJ Inorganic phosphate transporter 1-11 OS=Oryza sativa subsp. japonica OX=39947 GN=PHT1-11 PE=2 SV=1
LOC_Os01g61160	1.6095	1.56194e-08	Up	sp|Q941X2|LAC3_ORYSJ Laccase-3 OS=Oryza sativa subsp. japonica OX=39947 GN=LAC3 PE=2 SV=1
LOC_Os12g43450	2.60365	1.66915e-08	Up	sp|P81370|TLP_ACTDE Thaumatin-like protein OS=Actinidia deliciosa OX=3627 GN=tlp PE=1 SV=2
LOC_Os02g40840	1.21395	1.73014e-08	Up	sp|B5WWZ9|FAO2_LOTJA Long-chain-alcohol oxidase FAO2 OS=Lotus japonicus OX=34305 GN=FAO2 PE=2 SV=1
LOC_Os07g11870	3.42143	1.76627e-08	Up	sp|Q6YV88|C71Z7_ORYSJ Ent-cassadiene hydroxylase OS=Oryza sativa subsp. japonica OX=39947 GN=CYP71Z7 PE=1 SV=1
LOC_Os09g15790	1.05753	1.77708e-08	Up	sp|Q9FJH0|RAA1F_ARATH Ras-related protein RABA1f OS=Arabidopsis thaliana OX=3702 GN=RABA1F PE=2 SV=1
LOC_Os07g44550	-1.3858	1.90591e-08	Down	sp|Q9FEQ8|PER2_MAIZE Peroxidase 2 OS=Zea mays OX=4577 GN=PER2 PE=2 SV=1
LOC_Os12g31460	1.37803	1.91344e-08	Up	sp|Q84VQ4|NDHU_ARATH NAD(P)H-quinone oxidoreductase subunit U, chloroplastic OS=Arabidopsis thaliana OX=3702 GN=ndhU PE=1 SV=1
LOC_Os06g51170	1.13113	1.93828e-08	Up	sp|Q9SII6|PIX13_ARATH Probable serine/threonine-protein kinase PIX13 OS=Arabidopsis thaliana OX=3702 GN=PIX13 PE=1 SV=2
LOC_Os03g63900	1.36104	1.96441e-08	Up	sp|A2A1A0|NCS1_COPJA S-norcoclaurine synthase 1 OS=Coptis japonica OX=3442 GN=NCS1 PE=1 SV=1
LOC_Os02g47820	-7.50542	2.05172e-08	Down	--
LOC_Os04g46160	1.71436	2.06838e-08	Up	--
LOC_Os08g29660	-1.81231	2.09509e-08	Down	sp|Q9SUP6|WRK53_ARATH Probable WRKY transcription factor 53 OS=Arabidopsis thaliana OX=3702 GN=WRKY53 PE=1 SV=1
LOC_Os01g02830	1.99608	2.11727e-08	Up	sp|P93604|LRK10_WHEAT Rust resistance kinase Lr10 OS=Triticum aestivum OX=4565 GN=LRK10 PE=2 SV=1
LOC_Os02g35900	1.37089	2.15146e-08	Up	sp|Q6YTI3|TRL4_ORYSJ Thioredoxin-like 4, chloroplastic OS=Oryza sativa subsp. japonica OX=39947 GN=Os02g0567100 PE=2 SV=1
LOC_Os05g43310	2.19533	2.17917e-08	Up	sp|Q5ZBY9|PSBW_ORYSJ Photosystem II reaction center W protein, chloroplastic OS=Oryza sativa subsp. japonica OX=39947 GN=PSBW PE=2 SV=1
LOC_Os04g38450	1.14394	2.18216e-08	Up	sp|Q8VYW6|GAGT1_ARATH Glutathione hydrolase 1 OS=Arabidopsis thaliana OX=3702 GN=GGT1 PE=2 SV=1
LOC_Os05g23880	1.90683	2.18518e-08	Up	sp|Q41238|LOX16_SOLTU Linoleate 9S-lipoxygenase 6 (Fragment) OS=Solanum tuberosum OX=4113 GN=LOX1.6 PE=1 SV=1
LOC_Os02g08140	1.85634	2.35532e-08	Up	sp|Q94CG0|CIPKL_ARATH CBL-interacting serine/threonine-protein kinase 21 OS=Arabidopsis thaliana OX=3702 GN=CIPK21 PE=1 SV=1
LOC_Os02g38040	1.24015	2.3826e-08	Up	sp|Q6ZH85|PIRL2_ORYSJ Plant intracellular Ras-group-related LRR protein 2 OS=Oryza sativa subsp. japonica OX=39947 GN=IRL2 PE=2 SV=1
LOC_Os02g14480	1.32383	2.45043e-08	Up	sp|Q9FK63|CARLK_ARATH Calmodulin-binding receptor kinase CaMRLK OS=Arabidopsis thaliana OX=3702 GN=CAMRLK PE=1 SV=1
LOC_Os07g46330	1.03657	2.49657e-08	Up	--
LOC_Os03g16040	-1.05613	2.54207e-08	Down	sp|Q84J50|HS177_ORYSJ 17.7 kDa class I heat shock protein OS=Oryza sativa subsp. japonica OX=39947 GN=HSP17.7 PE=2 SV=1
LOC_Os04g56040	-1.21959	2.60315e-08	Down	--
LOC_Os02g49880	1.1514	2.67635e-08	Up	sp|Q8RWD0|COL16_ARATH Zinc finger protein CONSTANS-LIKE 16 OS=Arabidopsis thaliana OX=3702 GN=COL16 PE=1 SV=2
LOC_Os01g08464	1.27777	2.69255e-08	Up	--
LOC_Os06g38980	1.43193	2.70866e-08	Up	sp|Q05196|PABP5_ARATH Polyadenylate-binding protein 5 OS=Arabidopsis thaliana OX=3702 GN=PAB5 PE=1 SV=3
LOC_Os01g12750	1.17012	2.76807e-08	Up	sp|P24465|C71A1_PERAE Cytochrome P450 71A1 OS=Persea americana OX=3435 GN=CYP71A1 PE=1 SV=2
LOC_Os10g27380	1.5993	2.85744e-08	Up	--
LOC_Os03g46530	-6.38593	2.89849e-08	Down	--
LOC_Os03g10220	1.21605	2.97108e-08	Up	sp|Q8LFA9|METL2_ARATH Methyltransferase-like protein 2 OS=Arabidopsis thaliana OX=3702 GN=At1g19340 PE=2 SV=2
LOC_Os05g25400	1.29951	3.14891e-08	Up	--
LOC_Os04g02120	2.02723	3.18999e-08	Up	sp|Q7XA39|RGA4_SOLBU Putative disease resistance protein RGA4 OS=Solanum bulbocastanum OX=147425 GN=RGA4 PE=2 SV=1
LOC_Os09g37880	2.5987	3.34527e-08	Up	sp|O81905|SD18_ARATH Receptor-like serine/threonine-protein kinase SD1-8 OS=Arabidopsis thaliana OX=3702 GN=SD18 PE=1 SV=1
LOC_Os08g26230	1.00323	3.55968e-08	Up	--
LOC_Os06g40530	7.50544	3.5679e-08	Up	--
LOC_Os12g08090	-1.07727	3.69103e-08	Down	sp|Q39134|AAP3_ARATH Amino acid permease 3 OS=Arabidopsis thaliana OX=3702 GN=AAP3 PE=1 SV=2
LOC_Os04g43550	1.11685	3.74096e-08	Up	--
LOC_Os08g09840	1.27604	3.75492e-08	Up	sp|Q6AVI0|RSLE2_ORYSJ Zinc finger BED domain-containing protein RICESLEEPER 2 OS=Oryza sativa subsp. japonica OX=39947 GN=Os03g0733400 PE=2 SV=1
LOC_Os03g14669	1.23879	3.75547e-08	Up	sp|A6BLW4|NFYC2_ORYSJ Nuclear transcription factor Y subunit C-2 OS=Oryza sativa subsp. japonica OX=39947 GN=NFYC2 PE=1 SV=1
LOC_Os04g05650	-1.27249	4.08694e-08	Down	--
LOC_Os10g35300	1.12727	4.10892e-08	Up	sp|Q9M161|DOF41_ARATH Dof zinc finger protein DOF4.1 OS=Arabidopsis thaliana OX=3702 GN=DOF4.1 PE=2 SV=2
LOC_Os09g08130	1.33862	4.44137e-08	Up	sp|P49572|TRPC_ARATH Indole-3-glycerol phosphate synthase, chloroplastic OS=Arabidopsis thaliana OX=3702 GN=IGPS PE=1 SV=2
LOC_Os11g05800	1.97261	4.48025e-08	Up	sp|Q8GXE9|HA22J_ARATH HVA22-like protein j OS=Arabidopsis thaliana OX=3702 GN=HVA22J PE=2 SV=2
LOC_Os10g40240	-4.83741	4.52032e-08	Down	--
LOC_Os01g11720	5.47159	4.54949e-08	Up	--
LOC_Os04g01354	6.35121	4.59984e-08	Up	sp|O04111|CHSY_PERFR Chalcone synthase OS=Perilla frutescens OX=48386 GN=CHS PE=2 SV=1
LOC_Os11g44030	7.44737	4.72301e-08	Up	--
LOC_Os11g31360	1.16813	4.87867e-08	Up	sp|A0SPJ4|NAMB1_TRIDC NAC transcription factor NAM-B1 OS=Triticum dicoccoides OX=85692 GN=NAM-B1 PE=4 SV=1
LOC_Os01g42370	1.83176	5.15424e-08	Up	sp|Q8GU92|AB35G_ORYSJ ABC transporter G family member 35 OS=Oryza sativa subsp. japonica OX=39947 GN=ABCG35 PE=3 SV=1
LOC_Os04g52320	1.58008	5.28434e-08	Up	sp|O49432|QRT3_ARATH Polygalacturonase QRT3 OS=Arabidopsis thaliana OX=3702 GN=QRT3 PE=2 SV=1
LOC_Os03g47650	-1.97444	5.32754e-08	Down	sp|F8RP11|HSOP_WHEAT Hsp70-Hsp90 organizing protein OS=Triticum aestivum OX=4565 GN=HOP PE=1 SV=1
LOC_Os09g17152	-6.26881	5.5037e-08	Down	--
LOC_Os02g18390	-1.17976	5.54568e-08	Down	--
LOC_Os06g31040	2.96449	5.61475e-08	Up	--
LOC_Os07g06880	1.0337	5.8034e-08	Up	sp|Q9FG13|CXE15_ARATH Probable carboxylesterase 15 OS=Arabidopsis thaliana OX=3702 GN=CXE15 PE=2 SV=1
LOC_Os05g15490	-1.34228	5.80415e-08	Down	--
LOC_Os02g10500	1.58532	6.15805e-08	Up	--
LOC_Os10g31460	1.13476	6.38108e-08	Up	--
LOC_Os01g01430	-1.38635	6.87941e-08	Down	sp|Q9LD44|NAC56_ARATH NAC transcription factor 56 OS=Arabidopsis thaliana OX=3702 GN=NAC056 PE=2 SV=1
LOC_Os07g26660	1.39184	6.9309e-08	Up	sp|Q8GRI8|PIP25_ORYSJ Aquaporin PIP2-5 OS=Oryza sativa subsp. japonica OX=39947 GN=PIP2-5 PE=2 SV=1
LOC_Os08g14810	1.67162	6.96852e-08	Up	sp|P0DO07|PIK2_ORYSJ Disease resistance protein Pik-2 OS=Oryza sativa subsp. japonica OX=39947 GN=PIK-2 PE=3 SV=1
LOC_Os03g39830	1.29273	7.20951e-08	Up	--
LOC_Os02g31830	-1.64517	7.4388e-08	Down	sp|Q8LG98|OTU1_ARATH OVARIAN TUMOR DOMAIN-containing deubiquitinating enzyme 1 OS=Arabidopsis thaliana OX=3702 GN=OTU1 PE=1 SV=2
LOC_Os01g02360	2.48721	7.55235e-08	Up	sp|P93604|LRK10_WHEAT Rust resistance kinase Lr10 OS=Triticum aestivum OX=4565 GN=LRK10 PE=2 SV=1
LOC_Os11g11694	1.73415	8.10424e-08	Up	--
LOC_Os12g33130	3.16788	8.29171e-08	Up	--
LOC_Os06g24230	1.71001	8.38268e-08	Up	--
LOC_Os07g37130	1.20808	8.66561e-08	Up	sp|Q9M0Y3|ENT3_ARATH Equilibrative nucleotide transporter 3 OS=Arabidopsis thaliana OX=3702 GN=ENT3 PE=1 SV=1
LOC_Os12g25170	1.077	8.75776e-08	Up	sp|Q7XBQ9|RGA2_SOLBU Disease resistance protein RGA2 OS=Solanum bulbocastanum OX=147425 GN=RGA2 PE=1 SV=1
LOC_Os08g42080	-1.39174	9.27365e-08	Down	sp|Q8LJW3|ACR4_ARATH ACT domain-containing protein ACR4 OS=Arabidopsis thaliana OX=3702 GN=ACR4 PE=2 SV=1
LOC_Os04g42650	1.88971	9.36801e-08	Up	sp|Q9SD53|Y3720_ARATH UPF0481 protein At3g47200 OS=Arabidopsis thaliana OX=3702 GN=At3g47200 PE=2 SV=1
LOC_Os03g48040	1.14913	9.59769e-08	Up	sp|Q9C7Y4|FDC2_ARATH Ferredoxin C 2, chloroplastic OS=Arabidopsis thaliana OX=3702 GN=FDC2 PE=2 SV=1
LOC_Os04g44730	1.36885	9.68644e-08	Up	sp|Q8VZQ6|GCL2_ARATH LanC-like protein GCL2 OS=Arabidopsis thaliana OX=3702 GN=GCL2 PE=2 SV=1
LOC_Os12g11990	6.27102	1.00712e-07	Up	--
LOC_Os04g33310	1.10552	1.05447e-07	Up	sp|Q56XJ7|Y4276_ARATH Uncharacterized protein At4g22758 OS=Arabidopsis thaliana OX=3702 GN=At4g22758 PE=2 SV=1
LOC_Os10g13850	-2.11235	1.06552e-07	Down	--
LOC_Os07g11110	1.36817	1.09356e-07	Up	sp|Q9LYA9|CP41A_ARATH Chloroplast stem-loop binding protein of 41 kDa a, chloroplastic OS=Arabidopsis thaliana OX=3702 GN=CSP41A PE=1 SV=1
LOC_Os07g37730	1.11077	1.10285e-07	Up	sp|Q8GWA1|NDA1_ARATH Internal alternative NAD(P)H-ubiquinone oxidoreductase A1, mitochondrial OS=Arabidopsis thaliana OX=3702 GN=NDA1 PE=2 SV=1
LOC_Os02g57960	3.56289	1.13413e-07	Up	--
LOC_Os01g58280	2.72656	1.13536e-07	Up	sp|Q9MAP7|SBT35_ARATH Subtilisin-like protease SBT3.5 OS=Arabidopsis thaliana OX=3702 GN=SBT3.5 PE=1 SV=1
LOC_Os01g06690	7.31765	1.20884e-07	Up	--
LOC_Os12g17670	-1.2883	1.26286e-07	Down	--
LOC_Os01g59060	1.05664	1.26675e-07	Up	sp|P82244|RK34_SPIOL 50S ribosomal protein L34, chloroplastic OS=Spinacia oleracea OX=3562 GN=RPL34 PE=1 SV=1
LOC_Os04g54850	1.41694	1.29448e-07	Up	sp|Q3E8Z8|PME28_ARATH Putative pectinesterase/pectinesterase inhibitor 28 OS=Arabidopsis thaliana OX=3702 GN=PME28 PE=2 SV=1
LOC_Os10g36210	1.4959	1.31473e-07	Up	sp|P93736|SYVM1_ARATH Valine--tRNA ligase, mitochondrial 1 OS=Arabidopsis thaliana OX=3702 GN=TWN2 PE=1 SV=2
LOC_Os02g40180	1.61801	1.33045e-07	Up	sp|C0LGP4|Y3475_ARATH Probable LRR receptor-like serine/threonine-protein kinase At3g47570 OS=Arabidopsis thaliana OX=3702 GN=At3g47570 PE=2 SV=1
LOC_Os11g06070	1.46951	1.3421e-07	Up	--
LOC_Os01g65140	1.51501	1.35353e-07	Up	sp|Q0WP01|PTR9_ARATH Protein NRT1/ PTR FAMILY 5.10 OS=Arabidopsis thaliana OX=3702 GN=NPF5.10 PE=2 SV=1
LOC_Os07g23430	7.26319	1.38806e-07	Up	sp|A3F5L3|DES2_SORBI Fatty acid desaturase DES2 OS=Sorghum bicolor OX=4558 GN=DES2 PE=2 SV=1
LOC_Os05g38660	-1.72147	1.45034e-07	Down	--
LOC_Os04g53860	1.38605	1.54887e-07	Up	sp|D7U6G6|ANRPN_VITVI Anthocyanidin reductase ((2S)-flavan-3-ol-forming) OS=Vitis vinifera OX=29760 GN=ANR PE=3 SV=1
LOC_Os10g25620	-1.15962	1.5927e-07	Down	sp|Q9SQL0|JA2_SOLLC NAC domain-containing protein JA2 OS=Solanum lycopersicum OX=4081 GN=JA2 PE=2 SV=1
LOC_Os01g62670	-1.52542	1.59731e-07	Down	--
LOC_Os09g25720	1.12751	1.6147e-07	Up	--
LOC_Os01g49740	1.28777	1.63007e-07	Up	sp|Q9C9N6|PMI2_ARATH Protein PLASTID MOVEMENT IMPAIRED 2 OS=Arabidopsis thaliana OX=3702 GN=PMI2 PE=1 SV=1
LOC_Os07g29240	1.57028	1.7679e-07	Up	sp|Q67YC9|Y4141_ARATH Uncharacterized protein At4g14100 OS=Arabidopsis thaliana OX=3702 GN=At4g14100 PE=2 SV=1
LOC_Os06g11240	1.15142	1.81791e-07	Up	sp|Q69TH8|OPR4_ORYSJ Putative 12-oxophytodienoate reductase 4 OS=Oryza sativa subsp. japonica OX=39947 GN=OPR4 PE=2 SV=1
LOC_Os05g41670	1.343	1.90317e-07	Up	sp|O64518|MCA5_ARATH Metacaspase-5 OS=Arabidopsis thaliana OX=3702 GN=AMC5 PE=1 SV=1
LOC_Os04g54320	1.84938	1.9224e-07	Up	--
LOC_Os07g46870	6.15786	2.02042e-07	Up	sp|Q7FAE1|MOMAS_ORYSJ Momilactone A synthase OS=Oryza sativa subsp. japonica OX=39947 GN=Os04g0179200 PE=2 SV=1
LOC_Os01g02290	-1.43068	2.02277e-07	Down	sp|P93604|LRK10_WHEAT Rust resistance kinase Lr10 OS=Triticum aestivum OX=4565 GN=LRK10 PE=2 SV=1
LOC_Os10g08970	-7.12601	2.17181e-07	Down	sp|P08770|TRA1_MAIZE Putative AC transposase OS=Zea mays OX=4577 PE=2 SV=2
LOC_Os09g39620	1.21995	2.20503e-07	Up	sp|Q8GUH1|PUB33_ARATH U-box domain-containing protein 33 OS=Arabidopsis thaliana OX=3702 GN=PUB33 PE=2 SV=2
LOC_Os01g70730	2.60763	2.31185e-07	Up	sp|Q8LR63|FLP2_ORYSJ Flowering-promoting factor 1-like protein 2 OS=Oryza sativa subsp. japonica OX=39947 GN=Os01g0933500 PE=2 SV=1
LOC_Os03g25150	1.3089	2.3417e-07	Up	sp|P48418|C75A1_PETHY Flavonoid 3',5'-hydroxylase 1 OS=Petunia hybrida OX=4102 GN=CYP75A1 PE=1 SV=1
LOC_Os11g41100	1.43831	2.34932e-07	Up	sp|Q1MX30|XA21_ORYSI Receptor kinase-like protein Xa21 OS=Oryza sativa subsp. indica OX=39946 GN=XA21 PE=1 SV=1
LOC_Os02g57010	1.55546	2.49389e-07	Up	sp|P19684|ROC5_NICSY 33 kDa ribonucleoprotein, chloroplastic OS=Nicotiana sylvestris OX=4096 PE=1 SV=1
LOC_Os02g12470	1.30557	2.50935e-07	Up	--
LOC_Os08g11190	1.88181	2.52888e-07	Up	--
LOC_Os02g34930	4.08659	2.59259e-07	Up	--
LOC_Os09g28440	-6.10542	2.65096e-07	Down	sp|Q9SZ06|EF109_ARATH Ethylene-responsive transcription factor ERF109 OS=Arabidopsis thaliana OX=3702 GN=ERF109 PE=1 SV=1
LOC_Os06g05470	-1.59144	2.69361e-07	Down	--
LOC_Os02g34260	-4.65818	2.74201e-07	Down	sp|Q70II3|EF110_ARATH Ethylene-responsive transcription factor ERF110 OS=Arabidopsis thaliana OX=3702 GN=ERF110 PE=2 SV=2
LOC_Os04g09920	2.50273	2.86639e-07	Up	sp|Q0JF01|C99A3_ORYSJ 9-beta-pimara-7,15-diene oxidase OS=Oryza sativa subsp. japonica OX=39947 GN=CYP99A3 PE=1 SV=1
LOC_Os10g30390	1.51073	3.04147e-07	Up	sp|Q6YV88|C71Z7_ORYSJ Ent-cassadiene hydroxylase OS=Oryza sativa subsp. japonica OX=39947 GN=CYP71Z7 PE=1 SV=1
LOC_Os07g18300	6.02534	3.12218e-07	Up	--
LOC_Os04g23910	3.46024	3.12218e-07	Up	sp|Q84NC5|MAD25_ORYSJ MADS-box transcription factor 25 OS=Oryza sativa subsp. japonica OX=39947 GN=MADS25 PE=2 SV=2
LOC_Os10g11980	4.69042	3.47488e-07	Up	sp|Q7G4G7|AT1_ORYSJ Acyl transferase 1 OS=Oryza sativa subsp. japonica OX=39947 GN=AT1 PE=2 SV=1
LOC_Os04g45290	-1.43629	3.49235e-07	Down	sp|P49175|INV1_MAIZE Beta-fructofuranosidase 1 OS=Zea mays OX=4577 GN=IVR1 PE=3 SV=1
LOC_Os08g10010	-1.05915	3.75014e-07	Down	sp|A2YS76|STAD7_ORYSI Acyl-[acyl-carrier-protein] desaturase 7, chloroplastic OS=Oryza sativa subsp. indica OX=39946 GN=OsI_28174 PE=3 SV=1
LOC_Os01g55510	-1.2521	3.87606e-07	Down	sp|Q39580|DYL1_CHLRE Dynein 8 kDa light chain, flagellar outer arm OS=Chlamydomonas reinhardtii OX=3055 PE=1 SV=1
LOC_Os09g14490	1.31264	4.02992e-07	Up	sp|Q9LRR4|R13L1_ARATH Putative disease resistance RPP13-like protein 1 OS=Arabidopsis thaliana OX=3702 GN=RPPL1 PE=3 SV=1
LOC_Os11g05840	7.14617	4.03464e-07	Up	sp|P10978|POLX_TOBAC Retrovirus-related Pol polyprotein from transposon TNT 1-94 OS=Nicotiana tabacum OX=4097 PE=2 SV=1
LOC_Os09g29490	1.33285	4.21228e-07	Up	sp|Q9SJZ2|PER17_ARATH Peroxidase 17 OS=Arabidopsis thaliana OX=3702 GN=PER17 PE=2 SV=1
LOC_Os02g49550	1.0347	4.29928e-07	Up	sp|P0CH30|RING1_GOSHI E3 ubiquitin-protein ligase RING1 OS=Gossypium hirsutum OX=3635 GN=RING1 PE=1 SV=1
LOC_Os06g50130	1.64146	4.41731e-07	Up	--
LOC_Os02g36030	3.4809	4.4837e-07	Up	sp|Q6YTF5|C76M5_ORYSJ Cytochrome P450 76M5 OS=Oryza sativa subsp. japonica OX=39947 GN=CYP76M5 PE=1 SV=1
LOC_Os03g37470	1.23421	4.49162e-07	Up	sp|Q9LVD9|DTX40_ARATH Protein DETOXIFICATION 40 OS=Arabidopsis thaliana OX=3702 GN=DTX40 PE=1 SV=1
LOC_Os01g43750	2.49993	4.53103e-07	Up	sp|Q9LUC5|C7A15_ARATH Cytochrome P450 72A15 OS=Arabidopsis thaliana OX=3702 GN=CYP72A15 PE=2 SV=1
LOC_Os10g39100	1.42756	4.64921e-07	Up	--
LOC_Os08g43320	1.27983	4.6922e-07	Up	sp|Q9CAN1|RBL2_ARATH RHOMBOID-like protein 2 OS=Arabidopsis thaliana OX=3702 GN=RBL2 PE=1 SV=1
LOC_Os01g24490	2.09989	4.88602e-07	Up	--
LOC_Os01g32670	1.40425	4.99538e-07	Up	--
LOC_Os12g17230	-6.72253	5.03059e-07	Down	--
LOC_Os06g04150	2.46278	5.19633e-07	Up	sp|Q9SW18|CHLM_ARATH Magnesium protoporphyrin IX methyltransferase, chloroplastic OS=Arabidopsis thaliana OX=3702 GN=CHLM PE=1 SV=1
LOC_Os01g25710	1.76794	5.29661e-07	Up	--
LOC_Os07g03870	1.18143	5.5565e-07	Up	sp|Q7XUN6|SIT2_ORYSJ L-type lectin-domain containing receptor kinase SIT2 OS=Oryza sativa subsp. japonica OX=39947 GN=SIT2 PE=2 SV=2
LOC_Os06g01790	2.21368	5.56628e-07	Up	--
LOC_Os10g04270	-1.32933	5.58341e-07	Down	sp|Q5U9T2|LECH_HORVU Horcolin OS=Hordeum vulgare OX=4513 PE=3 SV=1
LOC_Os03g24930	2.30642	5.66192e-07	Up	sp|Q9SY91|PBL15_ARATH Probable serine/threonine-protein kinase PBL15 OS=Arabidopsis thaliana OX=3702 GN=PBL15 PE=1 SV=1
LOC_Os02g03200	-1.15412	6.17398e-07	Down	sp|Q6NQ66|GGLO2_ARATH L-gulonolactone oxidase 2 OS=Arabidopsis thaliana OX=3702 GN=GULLO2 PE=1 SV=1
LOC_Os08g22380	1.29074	6.18731e-07	Up	sp|P31843|RRPO_OENBE RNA-directed DNA polymerase homolog OS=Oenothera berteroana OX=3950 PE=4 SV=1
LOC_Os07g10990	2.06122	6.3264e-07	Up	--
LOC_Os11g17540	1.46229	6.54293e-07	Up	sp|Q9ZT66|E134_MAIZE Endo-1,3;1,4-beta-D-glucanase OS=Zea mays OX=4577 PE=1 SV=1
LOC_Os03g41438	2.12282	6.63914e-07	Up	sp|Q10GX0|SPZXB_ORYSJ Serpin-ZXB OS=Oryza sativa subsp. japonica OX=39947 GN=Os03g0610800 PE=2 SV=1
LOC_Os12g11000	7.00461	6.67302e-07	Up	--
LOC_Os08g13870	6.99909	6.67302e-07	Up	sp|Q0JEU6|LERK3_ORYSJ G-type lectin S-receptor-like serine/threonine-protein kinase LECRK3 OS=Oryza sativa subsp. japonica OX=39947 GN=LECRK3 PE=3 SV=2
LOC_Os06g14240	-2.51548	6.7321e-07	Down	sp|Q652V8|HSP16_ORYSJ 16.0 kDa heat shock protein, peroxisomal OS=Oryza sativa subsp. japonica OX=39947 GN=HSP16.0 PE=2 SV=1
LOC_Os09g26670	-3.41151	7.18721e-07	Down	--
LOC_Os06g04889	1.25199	7.38292e-07	Up	--
LOC_Os11g41970	6.9709	7.441e-07	Up	--
LOC_Os11g34130	1.40155	8.05613e-07	Up	sp|Q0WMN5|Y3913_ARATH Uncharacterized protein At3g49140 OS=Arabidopsis thaliana OX=3702 GN=At3g49140 PE=1 SV=2
LOC_Os02g06200	1.65342	8.27591e-07	Up	sp|Q9C7S5|PSYR1_ARATH Tyrosine-sulfated glycopeptide receptor 1 OS=Arabidopsis thaliana OX=3702 GN=PSY1R PE=1 SV=1
LOC_Os09g13440	2.24617	8.30905e-07	Up	--
LOC_Os01g02430	5.92581	8.67713e-07	Up	sp|P93604|LRK10_WHEAT Rust resistance kinase Lr10 OS=Triticum aestivum OX=4565 GN=LRK10 PE=2 SV=1
LOC_Os02g43250	1.13575	8.91858e-07	Up	sp|Q9ZWC8|BRL1_ARATH Serine/threonine-protein kinase BRI1-like 1 OS=Arabidopsis thaliana OX=3702 GN=BRL1 PE=1 SV=1
LOC_Os01g62060	6.93101	9.67842e-07	Up	--
LOC_Os03g54000	1.27478	1.0134e-06	Up	sp|O23482|OPT3_ARATH Oligopeptide transporter 3 OS=Arabidopsis thaliana OX=3702 GN=OPT3 PE=2 SV=3
LOC_Os09g33490	1.88976	1.05436e-06	Up	sp|Q9FY93|NAC83_ARATH NAC domain-containing protein 83 OS=Arabidopsis thaliana OX=3702 GN=NAC083 PE=1 SV=1
LOC_Os03g06970	-1.98884	1.06222e-06	Down	sp|Q8L730|SDI2_ARATH Protein SULFUR DEFICIENCY-INDUCED 2 OS=Arabidopsis thaliana OX=3702 GN=At1g04770 PE=2 SV=1
LOC_Os02g17240	-1.36513	1.1764e-06	Down	sp|Q9LV40|ROGF8_ARATH Rho guanine nucleotide exchange factor 8 OS=Arabidopsis thaliana OX=3702 GN=ROPGEF8 PE=1 SV=1
LOC_Os01g71310	-1.5539	1.19632e-06	Down	sp|Q5JLP4|CKX4_ORYSJ Cytokinin dehydrogenase 4 OS=Oryza sativa subsp. japonica OX=39947 GN=CKX4 PE=2 SV=1
LOC_Os10g32300	1.00291	1.28865e-06	Up	sp|C0PEY7|PYG7_MAIZE Tetratricopeptide repeat domain-containing protein PYG7, chloroplastic OS=Zea mays OX=4577 GN=PYG7 PE=2 SV=1
LOC_Os02g18070	3.05951	1.33133e-06	Up	sp|Q7XBQ9|RGA2_SOLBU Disease resistance protein RGA2 OS=Solanum bulbocastanum OX=147425 GN=RGA2 PE=1 SV=1
LOC_Os05g35050	-3.66307	1.36187e-06	Down	sp|Q60EN8|COPT2_ORYSJ Copper transporter 2 OS=Oryza sativa subsp. japonica OX=39947 GN=COPT2 PE=1 SV=1
LOC_Os10g36830	1.84337	1.36319e-06	Up	--
LOC_Os03g04350	-6.79421	1.3836e-06	Down	--
LOC_Os04g35030	4.57422	1.39006e-06	Up	sp|Q7XUU0|CSLH3_ORYSJ Putative cellulose synthase-like protein H3 OS=Oryza sativa subsp. japonica OX=39947 GN=CSLH3 PE=3 SV=3
LOC_Os01g02590	1.68089	1.41194e-06	Up	--
LOC_Os01g73250	5.8014	1.42123e-06	Up	sp|P37219|ASR2_SOLLC Abscisic stress-ripening protein 2 OS=Solanum lycopersicum OX=4081 GN=ASR2 PE=3 SV=1
LOC_Os07g38440	1.04103	1.42954e-06	Up	--
LOC_Os01g09990	3.48436	1.43476e-06	Up	sp|Q9LTS4|BH041_ARATH Putative transcription factor bHLH041 OS=Arabidopsis thaliana OX=3702 GN=BHLH41 PE=3 SV=1
LOC_Os04g19640	3.99398	1.45187e-06	Up	--
LOC_Os01g60930	2.37762	1.48821e-06	Up	--
LOC_Os03g39650	1.43371	1.56568e-06	Up	sp|A0A1D6GQ67|C71Z6_MAIZE Dolabradiene monooxygenase OS=Zea mays OX=4577 GN=CYP71Z16 PE=1 SV=1
LOC_Os03g08080	1.51306	1.6443e-06	Up	sp|Q9C595|YLMG2_ARATH YlmG homolog protein 2, chloroplastic OS=Arabidopsis thaliana OX=3702 GN=YLMG2 PE=2 SV=1
LOC_Os08g24750	-1.1094	1.66883e-06	Down	sp|Q9M5Q1|FUT1_PEA Galactoside 2-alpha-L-fucosyltransferase OS=Pisum sativum OX=3888 GN=FT1 PE=2 SV=1
LOC_Os01g57840	1.10772	1.6707e-06	Up	--
LOC_Os08g11669	1.49617	1.68191e-06	Up	NA
LOC_Os03g64070	1.14105	1.75219e-06	Up	sp|Q84M85|LOGL5_ORYSJ Probable cytokinin riboside 5'-monophosphate phosphoribohydrolase LOGL5 OS=Oryza sativa subsp. japonica OX=39947 GN=LOGL5 PE=2 SV=1
LOC_Os04g45600	1.30776	1.76569e-06	Up	sp|A2XVZ1|NDHM_ORYSI NAD(P)H-quinone oxidoreductase subunit M, chloroplastic OS=Oryza sativa subsp. indica OX=39946 GN=ndhM PE=3 SV=1
LOC_Os01g24820	-2.10353	1.77446e-06	Down	sp|Q2R8L1|RGA5S_ORYSJ Disease resistance protein RGA5 OS=Oryza sativa subsp. japonica OX=39947 GN=RGA5 PE=2 SV=1
LOC_Os01g36580	1.84792	1.80213e-06	Up	sp|Q9FGG3|WTR45_ARATH WAT1-related protein At5g64700 OS=Arabidopsis thaliana OX=3702 GN=At5g64700 PE=2 SV=1
LOC_Os05g30300	1.99457	1.80679e-06	Up	sp|Q60DY1|BGL21_ORYSJ Beta-glucosidase 21 OS=Oryza sativa subsp. japonica OX=39947 GN=BGLU21 PE=2 SV=2
LOC_Os11g11960	1.26729	1.84832e-06	Up	sp|Q39214|RPM1_ARATH Disease resistance protein RPM1 OS=Arabidopsis thaliana OX=3702 GN=RPM1 PE=1 SV=1
LOC_Os07g03780	2.04895	1.87152e-06	Up	sp|Q7XUN6|SIT2_ORYSJ L-type lectin-domain containing receptor kinase SIT2 OS=Oryza sativa subsp. japonica OX=39947 GN=SIT2 PE=2 SV=2
LOC_Os03g53790	5.78393	1.89669e-06	Up	sp|A5JTQ3|XYL2_MEDSV Beta-xylosidase/alpha-L-arabinofuranosidase 2 OS=Medicago sativa subsp. varia OX=36902 GN=Xyl2 PE=2 SV=1
LOC_Os12g26320	-1.93113	1.96593e-06	Down	sp|P31843|RRPO_OENBE RNA-directed DNA polymerase homolog OS=Oenothera berteroana OX=3950 PE=4 SV=1
LOC_Os02g24430	1.14704	2.00429e-06	Up	sp|Q93ZE9|SFH3_ARATH Phosphatidylinositol/phosphatidylcholine transfer protein SFH3 OS=Arabidopsis thaliana OX=3702 GN=SFH3 PE=2 SV=1
LOC_Os07g38800	1.25461	2.01985e-06	Up	sp|Q7XUN6|SIT2_ORYSJ L-type lectin-domain containing receptor kinase SIT2 OS=Oryza sativa subsp. japonica OX=39947 GN=SIT2 PE=2 SV=2
LOC_Os04g52260	2.31793	2.0585e-06	Up	sp|Q00451|PRF1_SOLLC 36.4 kDa proline-rich protein OS=Solanum lycopersicum OX=4081 GN=TPRP-F1 PE=2 SV=1
LOC_Os09g10054	1.22015	2.06627e-06	Up	sp|O64973|RPS5_ARATH Disease resistance protein RPS5 OS=Arabidopsis thaliana OX=3702 GN=RPS5 PE=1 SV=2
LOC_Os01g52750	-1.16641	2.12733e-06	Down	sp|Q9FK76|SBT56_ARATH Subtilisin-like protease SBT5.6 OS=Arabidopsis thaliana OX=3702 GN=SBT5.6 PE=2 SV=1
LOC_Os08g02700	2.64219	2.16703e-06	Up	sp|P17784|ALFC1_ORYSJ Fructose-bisphosphate aldolase 1, cytoplasmic OS=Oryza sativa subsp. japonica OX=39947 GN=FBA1 PE=1 SV=2
LOC_Os03g61860	-1.17742	2.18095e-06	Down	--
LOC_Os12g30180	3.73529	2.18675e-06	Up	sp|Q9SYS7|CRK39_ARATH Putative cysteine-rich receptor-like protein kinase 39 OS=Arabidopsis thaliana OX=3702 GN=CRK39 PE=3 SV=1
LOC_Os11g42200	1.17177	2.22063e-06	Up	sp|Q2R0L2|LAC19_ORYSJ Laccase-19 OS=Oryza sativa subsp. japonica OX=39947 GN=LAC19 PE=2 SV=1
LOC_Os02g15430	6.84836	2.29976e-06	Up	sp|Q9SD53|Y3720_ARATH UPF0481 protein At3g47200 OS=Arabidopsis thaliana OX=3702 GN=At3g47200 PE=2 SV=1
LOC_Os10g20794	3.33655	2.36018e-06	Up	--
LOC_Os06g22440	1.22362	2.3731e-06	Up	sp|Q9AR07|JMT_ARATH Jasmonate O-methyltransferase OS=Arabidopsis thaliana OX=3702 GN=JMT PE=1 SV=3
LOC_Os03g48220	1.40253	2.37566e-06	Up	--
LOC_Os06g44320	-2.30246	2.46973e-06	Down	sp|Q9M0B9|IBL1_ARATH Transcription factor IBH1-like 1 OS=Arabidopsis thaliana OX=3702 GN=IBL1 PE=1 SV=1
LOC_Os04g54640	1.27877	2.48198e-06	Up	--
LOC_Os06g25439	1.38956	2.51554e-06	Up	sp|Q8H124|Y2446_ARATH Uncharacterized protein At2g34460, chloroplastic OS=Arabidopsis thaliana OX=3702 GN=At2g34460 PE=1 SV=1
LOC_Os03g55050	-1.86366	2.52009e-06	Down	sp|Q9SGA8|U83A1_ARATH UDP-glycosyltransferase 83A1 OS=Arabidopsis thaliana OX=3702 GN=UGT83A1 PE=2 SV=1
LOC_Os07g43560	5.19712	2.60477e-06	Up	sp|Q0D5R3|CRK6_ORYSJ Cysteine-rich receptor-like protein kinase 6 OS=Oryza sativa subsp. japonica OX=39947 GN=CRK6 PE=1 SV=1
LOC_Os12g17950	-2.03625	2.61274e-06	Down	--
LOC_Os04g43060	1.3381	2.63344e-06	Up	--
LOC_Os04g53110	1.8878	2.79775e-06	Up	--
LOC_Os01g13130	1.40668	2.81125e-06	Up	sp|Q9LWR0|TIP42_ORYSJ Probable aquaporin TIP4-2 OS=Oryza sativa subsp. japonica OX=39947 GN=TIP4-2 PE=2 SV=2
LOC_Os12g30824	3.95391	2.92613e-06	Up	sp|Q2QQJ5|KSL10_ORYSJ Ent-sandaracopimara-8(14),15-diene synthase OS=Oryza sativa subsp. japonica OX=39947 GN=KSL10 PE=1 SV=2
LOC_Os02g04170	1.02191	2.95806e-06	Up	sp|Q6Z836|NADB_ORYSJ L-aspartate oxidase, chloroplastic OS=Oryza sativa subsp. japonica OX=39947 GN=Os02g0134400 PE=3 SV=1
LOC_Os01g53350	1.31731	3.08024e-06	Up	sp|Q9LK73|U88A1_ARATH UDP-glycosyltransferase 88A1 OS=Arabidopsis thaliana OX=3702 GN=UGT88A1 PE=2 SV=1
LOC_Os01g23990	1.68619	3.11031e-06	Up	--
LOC_Os04g24780	1.69009	3.12312e-06	Up	--
LOC_Os03g11300	1.91182	3.15065e-06	Up	--
LOC_Os04g27190	6.71934	3.24506e-06	Up	sp|Q5GJ59|TPS7_MAIZE Tau-cadinol synthase OS=Zea mays OX=4577 GN=TPS7 PE=1 SV=1
LOC_Os12g37710	1.32635	3.27149e-06	Up	sp|O23403|PPD1_ARATH PsbP domain-containing protein 1, chloroplastic OS=Arabidopsis thaliana OX=3702 GN=PPD1 PE=1 SV=1
LOC_Os01g17330	1.37244	3.28465e-06	Up	sp|Q9M060|IF62_ARATH Eukaryotic translation initiation factor 6-2 OS=Arabidopsis thaliana OX=3702 GN=EIF6-2 PE=2 SV=1
LOC_Os02g03020	1.03799	3.30991e-06	Up	sp|Q9ZPX9|KIC_ARATH Calcium-binding protein KIC OS=Arabidopsis thaliana OX=3702 GN=KIC PE=1 SV=2
LOC_Os08g19970	2.94948	3.36042e-06	Up	sp|Q9LNG5|PPP7L_ARATH Serine/threonine-protein phosphatase 7 long form homolog OS=Arabidopsis thaliana OX=3702 GN=MAIL3 PE=2 SV=1
LOC_Os10g38820	1.30683	3.38562e-06	Up	sp|Q69IL4|RF2A_ORYSJ Transcription factor RF2a OS=Oryza sativa subsp. japonica OX=39947 GN=RF2a PE=1 SV=1
LOC_Os09g06770	-1.18508	3.56705e-06	Down	sp|Q940T5|RDUF2_ARATH E3 ubiquitin-protein ligase RDUF2 OS=Arabidopsis thaliana OX=3702 GN=DURF2 PE=1 SV=1
LOC_Os06g40070	1.51259	3.68976e-06	Up	sp|Q39173|P2_ARATH NADP-dependent alkenal double bond reductase P2 OS=Arabidopsis thaliana OX=3702 GN=P2 PE=2 SV=2
LOC_Os12g09530	3.40127	3.70063e-06	Up	sp|P93295|M310_ARATH Uncharacterized mitochondrial protein AtMg00310 OS=Arabidopsis thaliana OX=3702 GN=AtMg00310 PE=4 SV=1
LOC_Os05g25914	3.57421	3.70063e-06	Up	--
LOC_Os08g01330	1.49731	3.72249e-06	Up	sp|Q9C8W9|NAC30_ARATH NAC domain-containing protein 30 OS=Arabidopsis thaliana OX=3702 GN=NAC030 PE=1 SV=1
LOC_Os05g45410	1.8391	3.75651e-06	Up	sp|Q93VB5|HFA4D_ORYSJ Heat stress transcription factor A-4d OS=Oryza sativa subsp. japonica OX=39947 GN=HSFA4D PE=1 SV=1
LOC_Os07g32680	-2.4533	3.76134e-06	Down	--
LOC_Os06g50180	1.16275	3.80668e-06	Up	sp|Q8GWX2|NIPA6_ARATH Probable magnesium transporter NIPA6 OS=Arabidopsis thaliana OX=3702 GN=At2g21120 PE=2 SV=1
LOC_Os04g34460	1.03313	3.84782e-06	Up	sp|Q0JD85|PAP7_ORYSJ Fibrillin protein 5 homolog OS=Oryza sativa subsp. japonica OX=39947 GN=FBN5 PE=1 SV=1
LOC_Os01g02730	2.41026	3.84782e-06	Up	sp|P93604|LRK10_WHEAT Rust resistance kinase Lr10 OS=Triticum aestivum OX=4565 GN=LRK10 PE=2 SV=1
LOC_Os02g49870	1.64046	3.85839e-06	Up	sp|O04616|CUT1A_ARATH Protein CURVATURE THYLAKOID 1A, chloroplastic OS=Arabidopsis thaliana OX=3702 GN=CURT1A PE=1 SV=1
LOC_Os03g42280	1.22396	3.98926e-06	Up	sp|Q851W5|Y3204_ORYSJ B3 domain-containing protein Os03g0620400 OS=Oryza sativa subsp. japonica OX=39947 GN=Os03g0620400 PE=2 SV=1
LOC_Os02g01326	1.43083	3.99462e-06	Up	sp|Q9LI65|WTR24_ARATH WAT1-related protein At3g30340 OS=Arabidopsis thaliana OX=3702 GN=At3g30340 PE=2 SV=1
LOC_Os06g27540	1.11695	4.13579e-06	Up	sp|P31843|RRPO_OENBE RNA-directed DNA polymerase homolog OS=Oenothera berteroana OX=3950 PE=4 SV=1
LOC_Os09g25100	1.32672	4.32111e-06	Up	sp|Q6ERS0|CIPKR_ORYSJ Putative CBL-interacting protein kinase 27 OS=Oryza sativa subsp. japonica OX=39947 GN=CIPK27 PE=3 SV=1
LOC_Os09g30438	-1.36422	4.34951e-06	Down	--
LOC_Os07g11320	2.13935	4.41979e-06	Up	sp|Q01883|RAG1_ORYSJ Seed allergenic protein RAG1 OS=Oryza sativa subsp. japonica OX=39947 GN=RAG1 PE=1 SV=2
LOC_Os10g42780	3.60516	4.57192e-06	Up	sp|Q9FVQ4|PLGG1_ARATH Plastidal glycolate/glycerate translocator 1, chloroplastic OS=Arabidopsis thaliana OX=3702 GN=PLGG1 PE=1 SV=1
LOC_Os11g44430	1.09835	4.58489e-06	Up	sp|Q9LY50|ACCR3_ARATH Putative serine/threonine-protein kinase-like protein CCR3 OS=Arabidopsis thaliana OX=3702 GN=CCR3 PE=2 SV=1
LOC_Os02g36414	1.70331	4.70728e-06	Up	sp|Q0JCR9|MST1_ORYSJ Sugar transport protein MST1 OS=Oryza sativa subsp. japonica OX=39947 GN=MST1 PE=2 SV=1
LOC_Os02g36280	2.25473	4.77826e-06	Up	sp|Q6Z5I7|C76M6_ORYSJ Oryzalexin E synthase OS=Oryza sativa subsp. japonica OX=39947 GN=CYP76M6 PE=1 SV=1
LOC_Os12g07210	1.53443	4.89505e-06	Up	--
LOC_Os09g23550	1.01101	4.91555e-06	Up	sp|Q6ERW7|CAD8C_ORYSJ Probable cinnamyl alcohol dehydrogenase 8C OS=Oryza sativa subsp. japonica OX=39947 GN=CAD8C PE=2 SV=2
LOC_Os02g24632	2.95367	4.94958e-06	Up	sp|Q6ENJ0|PSBC_ORYNI Photosystem II CP43 reaction center protein OS=Oryza nivara OX=4536 GN=psbC PE=3 SV=1
LOC_Os01g70850	1.60764	4.98674e-06	Up	sp|A2WYS7|PIR7B_ORYSI Esterase PIR7B OS=Oryza sativa subsp. indica OX=39946 GN=PIR7B PE=3 SV=2
LOC_Os07g35500	6.6794	4.99574e-06	Up	--
LOC_Os02g12070	3.94595	5.22755e-06	Up	--
LOC_Os03g03720	1.04598	5.29512e-06	Up	sp|P12859|G3PB_PEA Glyceraldehyde-3-phosphate dehydrogenase B, chloroplastic OS=Pisum sativum OX=3888 GN=GAPB PE=1 SV=2
LOC_Os12g15530	-1.01943	5.47229e-06	Down	sp|Q0IP28|LAC25_ORYSJ Laccase-25 OS=Oryza sativa subsp. japonica OX=39947 GN=LAC25 PE=3 SV=1
LOC_Os02g29600	2.73077	5.59958e-06	Up	sp|B8BHF1|GLO15_ORYSI Very-long-chain aldehyde decarbonylase GL1-5 OS=Oryza sativa subsp. indica OX=39946 GN=GL1-5 PE=2 SV=1
LOC_Os08g16430	1.90293	5.64355e-06	Up	sp|A0A140IL90|C96T1_NARAP Noroxomaritidine synthase OS=Narcissus aff. pseudonarcissus MK-2014 OX=1540222 GN=Cyp96T1 PE=1 SV=1
LOC_Os07g35540	1.14302	5.70475e-06	Up	sp|Q0D5R3|CRK6_ORYSJ Cysteine-rich receptor-like protein kinase 6 OS=Oryza sativa subsp. japonica OX=39947 GN=CRK6 PE=1 SV=1
LOC_Os01g43340	1.83789	5.82873e-06	Up	sp|Q9ZT94|POLR2_ARATH Retrovirus-related Pol polyprotein from transposon RE2 OS=Arabidopsis thaliana OX=3702 GN=RE2 PE=4 SV=1
LOC_Os10g23240	-1.65339	5.97776e-06	Down	--
LOC_Os12g30320	-2.80564	5.98249e-06	Down	--
LOC_Os02g22250	2.8098	6.11104e-06	Up	--
LOC_Os06g43600	-2.70375	6.30316e-06	Down	sp|Q00451|PRF1_SOLLC 36.4 kDa proline-rich protein OS=Solanum lycopersicum OX=4081 GN=TPRP-F1 PE=2 SV=1
LOC_Os01g20950	3.19469	6.41074e-06	Up	sp|Q9M1V2|SOT5_ARATH Cytosolic sulfotransferase 5 OS=Arabidopsis thaliana OX=3702 GN=SOT5 PE=1 SV=1
LOC_Os03g17174	1.46628	6.47055e-06	Up	sp|O80634|PNSL1_ARATH Photosynthetic NDH subunit of lumenal location 1, chloroplastic OS=Arabidopsis thaliana OX=3702 GN=PNSL1 PE=1 SV=2
LOC_Os02g30560	2.66209	6.58437e-06	Up	--
LOC_Os03g05700	1.19805	6.62804e-06	Up	--
LOC_Os07g22650	2.08398	6.99411e-06	Up	sp|Q8L794|XK1_ARATH D-ribulose kinase OS=Arabidopsis thaliana OX=3702 GN=XK1 PE=1 SV=1
LOC_Os03g51620	1.35059	7.00258e-06	Up	sp|F4IBD7|CSCLA_ARATH CSC1-like protein RXW8 OS=Arabidopsis thaliana OX=3702 GN=RXW8 PE=2 SV=1
LOC_Os08g10260	1.05186	7.01203e-06	Up	sp|Q2R8L1|RGA5S_ORYSJ Disease resistance protein RGA5 OS=Oryza sativa subsp. japonica OX=39947 GN=RGA5 PE=2 SV=1
LOC_Os03g16550	6.60913	7.34038e-06	Up	--
LOC_Os07g48790	2.7294	7.42962e-06	Up	sp|Q84VQ1|KINB1_ARATH SNF1-related protein kinase regulatory subunit beta-1 OS=Arabidopsis thaliana OX=3702 GN=KINB1 PE=1 SV=1
LOC_Os02g12300	2.48988	7.60776e-06	Up	sp|P40973|PLY_LILLO Pectate lyase OS=Lilium longiflorum OX=4690 PE=2 SV=1
LOC_Os05g08900	-1.39075	7.62779e-06	Down	--
LOC_Os05g27010	1.65074	7.8054e-06	Up	sp|Q8VZR7|PTR30_ARATH Protein NRT1/ PTR FAMILY 5.1 OS=Arabidopsis thaliana OX=3702 GN=NPF5.1 PE=2 SV=2
LOC_Os08g34690	3.7893	8.38986e-06	Up	sp|P08770|TRA1_MAIZE Putative AC transposase OS=Zea mays OX=4577 PE=2 SV=2
LOC_Os02g53230	1.15373	8.5193e-06	Up	sp|Q9STN3|SPT51_ARATH Putative transcription elongation factor SPT5 homolog 1 OS=Arabidopsis thaliana OX=3702 GN=At4g08350 PE=1 SV=2
LOC_Os11g41730	6.5988	8.68762e-06	Up	--
LOC_Os03g19427	2.0266	8.97309e-06	Up	sp|A2XFU4|NAS1_ORYSI Nicotianamine synthase 1 OS=Oryza sativa subsp. indica OX=39946 GN=NAS1 PE=2 SV=2
LOC_Os05g29790	1.58351	9.19933e-06	Up	sp|Q8RXK7|PME41_ARATH Probable pectinesterase/pectinesterase inhibitor 41 OS=Arabidopsis thaliana OX=3702 GN=PME41 PE=2 SV=2
LOC_Os03g56200	2.47573	9.36152e-06	Up	--
LOC_Os03g24760	1.14175	9.46666e-06	Up	sp|A0A1D6EFT8|EDSB_MAIZE Eudesmanediol synthase OS=Zea mays OX=4577 GN=EDS PE=1 SV=1
LOC_Os05g28090	1.37737	9.61482e-06	Up	sp|Q9CAC5|NDHL_ARATH NAD(P)H-quinone oxidoreductase subunit L, chloroplastic OS=Arabidopsis thaliana OX=3702 GN=ndhL PE=2 SV=1
LOC_Os04g31040	1.09443	9.70565e-06	Up	sp|Q9SM43|VDE_SPIOL Violaxanthin de-epoxidase, chloroplastic OS=Spinacia oleracea OX=3562 GN=VDE1 PE=1 SV=2
LOC_Os01g51450	2.01334	9.78288e-06	Up	sp|A2ZX50|NAP1C_ORYSJ Nucleosome assembly protein 1;3 OS=Oryza sativa subsp. japonica OX=39947 GN=NAP1;3 PE=3 SV=1
LOC_Os01g49750	6.5456	9.79268e-06	Up	--
LOC_Os07g12240	2.22016	1.06185e-05	Up	sp|Q0DZP5|CML17_ORYSJ Probable calcium-binding protein CML17 OS=Oryza sativa subsp. japonica OX=39947 GN=CML17 PE=2 SV=1
LOC_Os06g41450	1.13346	1.06601e-05	Up	sp|O48522|VQ17_ARATH VQ motif-containing protein 17 OS=Arabidopsis thaliana OX=3702 GN=VQ17 PE=2 SV=1
LOC_Os01g38110	2.10759	1.08242e-05	Up	sp|Q69X58|C76M7_ORYSJ Ent-cassadiene C11-alpha-hydroxylase 1 OS=Oryza sativa subsp. japonica OX=39947 GN=CYP76M7 PE=1 SV=1
LOC_Os07g02060	1.69646	1.1089e-05	Up	sp|Q9C983|WRK57_ARATH Probable WRKY transcription factor 57 OS=Arabidopsis thaliana OX=3702 GN=WRKY57 PE=2 SV=1
LOC_Os02g36950	-1.33177	1.13501e-05	Down	sp|B6TYV8|CNR2_MAIZE Cell number regulator 2 OS=Zea mays OX=4577 GN=CNR2 PE=2 SV=1
LOC_Os04g32140	-6.45256	1.17892e-05	Down	--
LOC_Os10g03570	1.03549	1.25773e-05	Up	sp|Q2R8L1|RGA5S_ORYSJ Disease resistance protein RGA5 OS=Oryza sativa subsp. japonica OX=39947 GN=RGA5 PE=2 SV=1
LOC_Os03g55770	1.36341	1.25923e-05	Up	--
LOC_Os06g21820	1.01016	1.25923e-05	Up	sp|Q0J998|IAMT1_ORYSJ Indole-3-acetate O-methyltransferase 1 OS=Oryza sativa subsp. japonica OX=39947 GN=IAMT1 PE=1 SV=1
LOC_Os02g42570	1.07591	1.33969e-05	Up	sp|P80680|FTRV_MAIZE Ferredoxin-thioredoxin reductase, variable chain OS=Zea mays OX=4577 PE=1 SV=1
LOC_Os01g11150	-1.37041	1.34415e-05	Down	sp|Q8S0S6|G2OX3_ORYSJ Gibberellin 2-beta-dioxygenase 3 OS=Oryza sativa subsp. japonica OX=39947 GN=GA2OX3 PE=1 SV=1
LOC_Os03g56869	1.52241	1.34623e-05	Up	sp|Q9FI13|RPI4_ARATH Probable ribose-5-phosphate isomerase 4, chloroplastic OS=Arabidopsis thaliana OX=3702 GN=RPI4 PE=2 SV=1
LOC_Os05g41190	1.45309	1.3741e-05	Up	--
LOC_Os06g29660	2.036	1.39221e-05	Up	--
LOC_Os07g02624	2.47973	1.39653e-05	Up	sp|Q7XBQ9|RGA2_SOLBU Disease resistance protein RGA2 OS=Solanum bulbocastanum OX=147425 GN=RGA2 PE=1 SV=1
LOC_Os02g09390	1.23627	1.41322e-05	Up	sp|A6YIH8|C7D55_HYOMU Premnaspirodiene oxygenase OS=Hyoscyamus muticus OX=35626 GN=CYP71D55 PE=1 SV=1
LOC_Os04g36830	-1.50486	1.42231e-05	Down	sp|Q9ZUF7|LOR6_ARATH Protein LURP-one-related 6 OS=Arabidopsis thaliana OX=3702 GN=At2g05910 PE=2 SV=1
LOC_Os10g31040	1.47612	1.42292e-05	Up	sp|Q10SY9|LSI2_ORYSJ Silicon efflux transporter LSI2 OS=Oryza sativa subsp. japonica OX=39947 GN=LSI2 PE=1 SV=1
LOC_Os03g06230	1.2256	1.47392e-05	Up	sp|Q94AQ8|PNSB2_ARATH Photosynthetic NDH subunit of subcomplex B 2, chloroplastic OS=Arabidopsis thaliana OX=3702 GN=PNSB2 PE=2 SV=1
LOC_Os12g22680	1.0944	1.48368e-05	Up	sp|P59226|H32_ARATH Histone H3.2 OS=Arabidopsis thaliana OX=3702 GN=HTR2 PE=1 SV=2
LOC_Os11g16920	1.41654	1.51904e-05	Up	sp|P10978|POLX_TOBAC Retrovirus-related Pol polyprotein from transposon TNT 1-94 OS=Nicotiana tabacum OX=4097 PE=2 SV=1
LOC_Os03g57149	1.79321	1.5877e-05	Up	sp|Q84X53|MTEF1_ARATH Transcription termination factor MTEF1, chloroplastic OS=Arabidopsis thaliana OX=3702 GN=MTERF1 PE=2 SV=2
LOC_Os06g47250	1.06457	1.5877e-05	Up	--
LOC_Os02g07170	-1.77767	1.61267e-05	Down	sp|Q700D9|MYBF_ARATH Putative Myb family transcription factor At1g14600 OS=Arabidopsis thaliana OX=3702 GN=At1g14600 PE=2 SV=2
LOC_Os09g27930	2.03787	1.62845e-05	Up	sp|P0CH34|RL40A_ORYSJ Ubiquitin-60S ribosomal protein L40-1 OS=Oryza sativa subsp. japonica OX=39947 GN=Ub-CEP52-1 PE=2 SV=1
LOC_Os05g39590	1.08273	1.6957e-05	Up	sp|Q65WX1|DRE2D_ORYSJ Dehydration-responsive element-binding protein 2D OS=Oryza sativa subsp. japonica OX=39947 GN=DREB2D PE=2 SV=1
LOC_Os06g07914	-2.40637	1.74595e-05	Down	sp|Q9ZWQ9|FLS_CITUN Flavonol synthase/flavanone 3-hydroxylase OS=Citrus unshiu OX=55188 GN=FLS PE=1 SV=1
LOC_Os12g02800	1.20371	1.76304e-05	Up	--
LOC_Os01g13610	4.21889	1.79626e-05	Up	sp|P52580|IFRH_MAIZE Isoflavone reductase homolog IRL OS=Zea mays OX=4577 GN=IRL PE=2 SV=1
LOC_Os10g33450	1.4171	1.80509e-05	Up	--
LOC_Os08g01170	1.82529	1.88878e-05	Up	sp|Q6Z1Y6|SNAT2_ORYSJ Serotonin N-acetyltransferase 2, chloroplastic OS=Oryza sativa subsp. japonica OX=39947 GN=SNAT2 PE=1 SV=1
LOC_Os07g07300	2.09351	1.91072e-05	Up	--
LOC_Os08g26310	6.3868	1.92333e-05	Up	--
LOC_Os07g46350	1.09614	1.97927e-05	Up	sp|P52711|CBP23_HORVU Serine carboxypeptidase II-3 OS=Hordeum vulgare OX=4513 GN=CXP;2-3 PE=2 SV=1
LOC_Os11g25700	2.10564	1.9847e-05	Up	sp|Q9LHT0|TRNHF_ARATH Tropinone reductase homolog At5g06060 OS=Arabidopsis thaliana OX=3702 GN=At5g06060 PE=2 SV=1
LOC_Os01g12000	-1.82084	2.0138e-05	Down	--
LOC_Os04g33660	2.14363	2.03955e-05	Up	sp|O04846|ATCA1_ARATH Alpha carbonic anhydrase 1, chloroplastic OS=Arabidopsis thaliana OX=3702 GN=ACA1 PE=1 SV=2
LOC_Os06g15330	1.57031	2.07568e-05	Up	sp|Q8RWD0|COL16_ARATH Zinc finger protein CONSTANS-LIKE 16 OS=Arabidopsis thaliana OX=3702 GN=COL16 PE=1 SV=2
LOC_Os03g30780	1.23745	2.13726e-05	Up	--
LOC_Os07g35004	1.50675	2.29688e-05	Up	sp|Q0D5R3|CRK6_ORYSJ Cysteine-rich receptor-like protein kinase 6 OS=Oryza sativa subsp. japonica OX=39947 GN=CRK6 PE=1 SV=1
LOC_Os02g50470	2.11956	2.33859e-05	Up	--
LOC_Os05g48710	-1.17516	2.54402e-05	Down	--
LOC_Os01g72170	1.24414	2.55391e-05	Up	sp|Q9FQA3|GST23_MAIZE Glutathione transferase GST 23 OS=Zea mays OX=4577 PE=2 SV=1
LOC_Os01g37050	1.32918	2.56297e-05	Up	sp|Q5JK90|RTL1_ORYSJ Ribonuclease 3-like protein 1 OS=Oryza sativa subsp. japonica OX=39947 GN=Os01g0551100 PE=2 SV=1
LOC_Os06g47910	2.58806	2.64694e-05	Up	sp|Q3MKY2|AAE_RAUSE Acetylajmalan esterase OS=Rauvolfia serpentina OX=4060 GN=AAE PE=1 SV=1
LOC_Os01g02670	6.38948	2.66506e-05	Up	sp|P10978|POLX_TOBAC Retrovirus-related Pol polyprotein from transposon TNT 1-94 OS=Nicotiana tabacum OX=4097 PE=2 SV=1
LOC_Os01g37710	2.71542	2.68986e-05	Up	--
LOC_Os09g10010	1.03972	2.71035e-05	Up	--
LOC_Os10g27390	1.87488	2.74771e-05	Up	sp|D2SMN4|NAMB1_HORVS NAC transcription factor NAM-B1 OS=Hordeum vulgare subsp. spontaneum OX=77009 GN=NAM-B1 PE=4 SV=1
LOC_Os02g34580	4.1819	2.77474e-05	Up	sp|Q69T29|AMT33_ORYSJ Ammonium transporter 3 member 3 OS=Oryza sativa subsp. japonica OX=39947 GN=AMT3-3 PE=2 SV=1
LOC_Os02g43470	1.549	2.78469e-05	Up	sp|Q6H3Y7|DHE3_ORYSJ Glutamate dehydrogenase 3, mitochondrial OS=Oryza sativa subsp. japonica OX=39947 GN=GDH3 PE=2 SV=1
LOC_Os11g04860	-1.15289	2.83835e-05	Down	sp|K4CWS6|U75C1_SOLLC UDP-glycosyltransferase 75C1 OS=Solanum lycopersicum OX=4081 GN=UGT75C1 PE=1 SV=1
LOC_Os10g42040	6.3065	3.03439e-05	Up	--
LOC_Os02g31230	1.58333	3.08376e-05	Up	--
LOC_Os12g24650	3.06884	3.10046e-05	Up	sp|Q2QSB9|AMPL1_ORYSJ Putative leucine aminopeptidase 1 OS=Oryza sativa subsp. japonica OX=39947 GN=Os12g0434400 PE=3 SV=2
LOC_Os01g56570	2.0898	3.10845e-05	Up	sp|Q9FLD7|GT14A_ARATH Beta-glucuronosyltransferase GlcAT14A OS=Arabidopsis thaliana OX=3702 GN=GLCAT14A PE=2 SV=1
LOC_Os03g58500	-5.18171	3.10939e-05	Down	--
LOC_Os09g17610	1.46629	3.11457e-05	Up	sp|Q6AVN2|SIRP1_ORYSJ E3 ubiquitin-protein ligase SIRP1 OS=Oryza sativa subsp. japonica OX=39947 GN=SIRP1 PE=1 SV=1
LOC_Os07g11670	2.83587	3.16342e-05	Up	--
LOC_Os09g19300	2.00768	3.24521e-05	Up	--
LOC_Os05g07080	2.27704	3.30322e-05	Up	sp|O64477|Y2913_ARATH G-type lectin S-receptor-like serine/threonine-protein kinase At2g19130 OS=Arabidopsis thaliana OX=3702 GN=At2g19130 PE=2 SV=1
LOC_Os04g55980	1.3611	3.3178e-05	Up	--
LOC_Os01g15610	1.1105	3.34628e-05	Up	--
LOC_Os05g07810	1.35452	3.4579e-05	Up	sp|Q8L4N1|PHO34_ARATH Universal stress protein PHOS34 OS=Arabidopsis thaliana OX=3702 GN=PHOS34 PE=1 SV=1
LOC_Os09g09350	-1.18369	3.46332e-05	Down	--
LOC_Os06g30290	1.03473	3.53438e-05	Up	--
LOC_Os04g30390	-1.3141	3.54293e-05	Down	--
LOC_Os12g23520	2.41509	3.55863e-05	Up	--
LOC_Os08g02230	-1.17259	3.56738e-05	Down	sp|O81032|GGLO6_ARATH Probable L-gulonolactone oxidase 6 OS=Arabidopsis thaliana OX=3702 GN=GULLO6 PE=3 SV=1
LOC_Os11g02810	4.55922	3.59346e-05	Up	--
LOC_Os01g47635	1.82446	3.65755e-05	Up	sp|Q0WPS2|B561M_ARATH Cytochrome b561 domain-containing protein At4g18260 OS=Arabidopsis thaliana OX=3702 GN=At4g18260 PE=2 SV=1
LOC_Os11g31980	-1.0059	3.67338e-05	Down	sp|Q93Y09|SCP45_ARATH Serine carboxypeptidase-like 45 OS=Arabidopsis thaliana OX=3702 GN=SCPL45 PE=2 SV=1
LOC_Os06g44220	-4.53127	3.72348e-05	Down	sp|Q9LRI7|OSR8_ORYSJ Hydrophobic protein OSR8 OS=Oryza sativa subsp. japonica OX=39947 GN=OSR8 PE=3 SV=1
LOC_Os11g44780	3.56697	3.87748e-05	Up	sp|Q94HW2|POLR1_ARATH Retrovirus-related Pol polyprotein from transposon RE1 OS=Arabidopsis thaliana OX=3702 GN=RE1 PE=2 SV=1
LOC_Os09g04050	1.13643	3.90336e-05	Up	sp|Q9S9N9|CCR1_ARATH Cinnamoyl-CoA reductase 1 OS=Arabidopsis thaliana OX=3702 GN=CCR1 PE=1 SV=1
LOC_Os06g20820	2.91712	3.9386e-05	Up	--
LOC_Os06g16630	-1.41801	3.9671e-05	Down	--
LOC_Os03g10210	-1.17389	3.9821e-05	Down	sp|Q10QF2|HOX12_ORYSJ Homeobox-leucine zipper protein HOX12 OS=Oryza sativa subsp. japonica OX=39947 GN=HOX12 PE=2 SV=1
LOC_Os09g10750	1.0469	4.00318e-05	Up	sp|O48529|STR9_ARATH Rhodanese-like domain-containing protein 9, chloroplastic OS=Arabidopsis thaliana OX=3702 GN=STR9 PE=2 SV=1
LOC_Os01g71040	1.58868	4.00772e-05	Up	--
LOC_Os10g25930	-2.17825	4.04809e-05	Down	sp|P55217|CGS1_ARATH Cystathionine gamma-synthase 1, chloroplastic OS=Arabidopsis thaliana OX=3702 GN=CGS1 PE=1 SV=3
LOC_Os07g37454	-1.01755	4.07504e-05	Down	sp|O64515|OCT2_ARATH Organic cation/carnitine transporter 2 OS=Arabidopsis thaliana OX=3702 GN=OCT2 PE=2 SV=1
LOC_Os06g21410	3.48001	4.10113e-05	Up	sp|Q8S2W4|AGP23_ARATH Arabinogalactan protein 23 OS=Arabidopsis thaliana OX=3702 GN=AGP23 PE=1 SV=2
LOC_Os06g02210	1.22931	4.15169e-05	Up	sp|Q07469|BSPA_POPDE Bark storage protein A OS=Populus deltoides OX=3696 GN=BSPA PE=2 SV=1
LOC_Os07g48330	1.53563	4.16391e-05	Up	sp|Q7XHW5|C14B1_ORYSJ Cytochrome P450 714B1 OS=Oryza sativa subsp. japonica OX=39947 GN=CYP714B1 PE=1 SV=2
LOC_Os06g41050	1.2727	4.20898e-05	Up	sp|Q9ZRT1|GR1_ARATH Protein gamma response 1 OS=Arabidopsis thaliana OX=3702 GN=GR1 PE=1 SV=2
LOC_Os01g39660	-6.166	4.20898e-05	Down	sp|P08770|TRA1_MAIZE Putative AC transposase OS=Zea mays OX=4577 PE=2 SV=2
LOC_Os07g30180	-1.11464	4.32805e-05	Down	--
LOC_Os02g24940	6.22956	4.34307e-05	Up	sp|P15268|MOSA_MAIZE Autonomous transposable element EN-1 mosaic protein OS=Zea mays OX=4577 PE=2 SV=1
LOC_Os03g16540	3.61035	4.35929e-05	Up	sp|Q9SZL8|FRS5_ARATH Protein FAR1-RELATED SEQUENCE 5 OS=Arabidopsis thaliana OX=3702 GN=FRS5 PE=1 SV=1
LOC_Os11g41550	1.25571	4.36277e-05	Up	--
LOC_Os09g31502	1.10477	4.42305e-05	Up	sp|Q9S9N9|CCR1_ARATH Cinnamoyl-CoA reductase 1 OS=Arabidopsis thaliana OX=3702 GN=CCR1 PE=1 SV=1
LOC_Os02g38020	1.11574	4.47972e-05	Up	sp|Q38954|PHT21_ARATH Inorganic phosphate transporter 2-1, chloroplastic OS=Arabidopsis thaliana OX=3702 GN=PHT2-1 PE=1 SV=1
LOC_Os12g35340	6.22838	4.6204e-05	Up	sp|Q2QP86|GRC15_ORYSJ Glutaredoxin-C15 OS=Oryza sativa subsp. japonica OX=39947 GN=GRXC15 PE=3 SV=1
LOC_Os12g13800	1.29605	4.62759e-05	Up	sp|Q0IP69|NOMT_ORYSJ Naringenin 7-O-methyltransferase OS=Oryza sativa subsp. japonica OX=39947 GN=Os12g0240900 PE=1 SV=2
LOC_Os09g27260	-1.31198	4.71742e-05	Down	--
LOC_Os06g02780	1.93608	4.77114e-05	Up	sp|Q8S9J6|ASPA_ARATH Aspartyl protease family protein At5g10770 OS=Arabidopsis thaliana OX=3702 GN=At5g10770 PE=2 SV=1
LOC_Os07g39720	1.89848	4.88892e-05	Up	--
LOC_Os11g10120	1.63032	4.93681e-05	Up	sp|Q7XBQ9|RGA2_SOLBU Disease resistance protein RGA2 OS=Solanum bulbocastanum OX=147425 GN=RGA2 PE=1 SV=1
LOC_Os04g38670	-2.92251	4.94259e-05	Down	sp|Q9LXF8|AVT1J_ARATH Amino acid transporter AVT1J OS=Arabidopsis thaliana OX=3702 GN=AVT1J PE=2 SV=1
LOC_Os01g38500	1.24858	4.94619e-05	Up	sp|Q9M015|Y5161_ARATH Uncharacterized protein At5g01610 OS=Arabidopsis thaliana OX=3702 GN=At5g01610 PE=1 SV=1
LOC_Os02g01210	2.27866	4.94657e-05	Up	sp|Q39134|AAP3_ARATH Amino acid permease 3 OS=Arabidopsis thaliana OX=3702 GN=AAP3 PE=1 SV=2
LOC_Os03g49560	4.11165	5.0058e-05	Up	--
LOC_Os02g06580	1.06257	5.29698e-05	Up	sp|Q6H7U3|FH10_ORYSJ Formin-like protein 10 OS=Oryza sativa subsp. japonica OX=39947 GN=FH10 PE=2 SV=1
LOC_Os08g07380	2.69555	5.62253e-05	Up	sp|P0DO07|PIK2_ORYSJ Disease resistance protein Pik-2 OS=Oryza sativa subsp. japonica OX=39947 GN=PIK-2 PE=3 SV=1
LOC_Os11g14190	1.07574	5.7149e-05	Up	sp|Q6NMD6|ARGOS_ARATH Protein AUXIN-REGULATED GENE INVOLVED IN ORGAN SIZE OS=Arabidopsis thaliana OX=3702 GN=ARGOS PE=2 SV=1
LOC_Os07g02690	3.57448	5.74461e-05	Up	--
LOC_Os01g57520	-6.08404	5.98549e-05	Down	--
LOC_Os12g39700	1.10612	6.24615e-05	Up	sp|P0C2F6|RNHX1_ARATH Putative ribonuclease H protein At1g65750 OS=Arabidopsis thaliana OX=3702 GN=At1g65750 PE=3 SV=1
LOC_Os06g37330	6.27547	6.38373e-05	Up	sp|Q5Z5R7|C701S_ORYSJ Ent-kaurene oxidase-like 3 OS=Oryza sativa subsp. japonica OX=39947 GN=CYP701A19 PE=2 SV=1
LOC_Os01g44390	2.001	6.41014e-05	Up	sp|Q9SIJ5|RADL2_ARATH Protein RADIALIS-like 2 OS=Arabidopsis thaliana OX=3702 GN=RL2 PE=2 SV=1
LOC_Os03g47530	-1.77682	6.45769e-05	Down	sp|Q9LN68|GATL1_ARATH Probable galacturonosyltransferase-like 1 OS=Arabidopsis thaliana OX=3702 GN=GATL1 PE=2 SV=1
LOC_Os11g45970	1.24602	6.46758e-05	Up	sp|F7J0N2|RGA5R_ORYSJ Disease resistance protein RGA5 OS=Oryza sativa subsp. japonica OX=39947 GN=RGA5 PE=1 SV=1
LOC_Os01g64270	1.47285	6.63515e-05	Up	--
LOC_Os07g31530	1.60556	6.66693e-05	Up	sp|P0C2F6|RNHX1_ARATH Putative ribonuclease H protein At1g65750 OS=Arabidopsis thaliana OX=3702 GN=At1g65750 PE=3 SV=1
LOC_Os03g25760	-1.12929	6.98143e-05	Down	sp|Q9LHN9|IQM2_ARATH IQ domain-containing protein IQM2 OS=Arabidopsis thaliana OX=3702 GN=IQM2 PE=2 SV=1
LOC_Os09g33850	3.6285	6.99839e-05	Up	sp|Q9SXZ2|FT_ARATH Protein FLOWERING LOCUS T OS=Arabidopsis thaliana OX=3702 GN=FT PE=1 SV=2
LOC_Os06g35140	-1.3575	7.07407e-05	Down	sp|Q700D9|MYBF_ARATH Putative Myb family transcription factor At1g14600 OS=Arabidopsis thaliana OX=3702 GN=At1g14600 PE=2 SV=2
LOC_Os02g05744	1.36486	7.54193e-05	Up	sp|Q67UW5|GUN5_ORYSJ Endoglucanase 5 OS=Oryza sativa subsp. japonica OX=39947 GN=Os02g0151300 PE=2 SV=1
LOC_Os04g54080	1.95619	7.56834e-05	Up	sp|O81906|B120_ARATH G-type lectin S-receptor-like serine/threonine-protein kinase B120 OS=Arabidopsis thaliana OX=3702 GN=B120 PE=2 SV=1
LOC_Os02g17534	1.45961	7.69947e-05	Up	sp|Q9M5Q1|FUT1_PEA Galactoside 2-alpha-L-fucosyltransferase OS=Pisum sativum OX=3888 GN=FT1 PE=2 SV=1
LOC_Os01g49020	-1.17941	7.85824e-05	Down	--
LOC_Os07g46860	3.73054	8.00949e-05	Up	sp|Q7FAE1|MOMAS_ORYSJ Momilactone A synthase OS=Oryza sativa subsp. japonica OX=39947 GN=Os04g0179200 PE=2 SV=1
LOC_Os10g15300	1.52357	8.03652e-05	Up	--
LOC_Os05g40180	1.1383	8.08168e-05	Up	sp|Q9LZV4|STN8_ARATH Serine/threonine-protein kinase STN8, chloroplastic OS=Arabidopsis thaliana OX=3702 GN=STN8 PE=2 SV=1
LOC_Os02g29130	-3.07623	8.16498e-05	Down	sp|F8RP11|HSOP_WHEAT Hsp70-Hsp90 organizing protein OS=Triticum aestivum OX=4565 GN=HOP PE=1 SV=1
LOC_Os08g15420	-1.03171	8.29157e-05	Down	sp|Q7PC69|CSLC3_ORYSJ Probable xyloglucan glycosyltransferase 3 OS=Oryza sativa subsp. japonica OX=39947 GN=CSLC3 PE=2 SV=1
LOC_Os08g16070	6.14696	8.75802e-05	Up	sp|Q39214|RPM1_ARATH Disease resistance protein RPM1 OS=Arabidopsis thaliana OX=3702 GN=RPM1 PE=1 SV=1
LOC_Os03g51980	1.68474	9.19344e-05	Up	--
LOC_Os01g50820	1.30197	9.25709e-05	Up	sp|Q94JG1|NRT23_ORYSJ High-affinity nitrate transporter 2.3 OS=Oryza sativa subsp. japonica OX=39947 GN=NRT2.3 PE=1 SV=1
LOC_Os12g04080	-1.57682	9.76359e-05	Down	sp|Q338X7|THT1_ORYSJ Tryptamine hydroxycinnamoyltransferase 1 OS=Oryza sativa subsp. japonica OX=39947 GN=THT1 PE=1 SV=1
LOC_Os11g05390	1.19265	9.97436e-05	Up	--
LOC_Os01g45720	-3.89457	0.000100395	Down	--
LOC_Os02g37254	-1.14127	0.000101884	Down	--
LOC_Os10g02300	2.55107	0.000102573	Up	sp|D9HP26|CNR10_MAIZE Cell number regulator 10 OS=Zea mays OX=4577 GN=CNR10 PE=2 SV=1
LOC_Os07g02570	1.24742	0.000104533	Up	sp|Q7XBQ9|RGA2_SOLBU Disease resistance protein RGA2 OS=Solanum bulbocastanum OX=147425 GN=RGA2 PE=1 SV=1
LOC_Os09g34250	-1.08842	0.000107944	Down	sp|M0Y4P1|UGT13_HORVV UDP-glucosyltransferase UGT13248 OS=Hordeum vulgare subsp. vulgare OX=112509 PE=2 SV=1
LOC_Os11g36940	1.54305	0.000108132	Up	sp|Q6NKW9|E138_ARATH Glucan endo-1,3-beta-glucosidase 8 OS=Arabidopsis thaliana OX=3702 GN=At1g64760 PE=2 SV=2
LOC_Os09g37976	-1.71446	0.000111356	Down	sp|A0A222NNM9|COS1_COCNU Cocosin 1 OS=Cocos nucifera OX=13894 GN=COS-1 PE=1 SV=1
LOC_Os05g20950	3.97767	0.000111722	Up	--
LOC_Os01g20206	-1.1843	0.000113545	Down	--
LOC_Os01g55670	1.13064	0.000113585	Up	--
LOC_Os06g04220	-2.12646	0.000114863	Down	--
LOC_Os11g45050	2.79394	0.000116347	Up	sp|Q7XA39|RGA4_SOLBU Putative disease resistance protein RGA4 OS=Solanum bulbocastanum OX=147425 GN=RGA4 PE=2 SV=1
LOC_Os09g16449	5.00044	0.000116902	Up	sp|B9G300|AB52G_ORYSJ ABC transporter G family member 52 OS=Oryza sativa subsp. japonica OX=39947 GN=ABCG52 PE=2 SV=2
LOC_Os03g08560	1.8139	0.000116902	Up	sp|Q43128|PMA10_ARATH ATPase 10, plasma membrane-type OS=Arabidopsis thaliana OX=3702 GN=AHA10 PE=2 SV=2
LOC_Os09g10340	2.12739	0.000116963	Up	sp|A6YIH8|C7D55_HYOMU Premnaspirodiene oxygenase OS=Hyoscyamus muticus OX=35626 GN=CYP71D55 PE=1 SV=1
LOC_Os03g64340	-1.48231	0.000117911	Down	sp|Q9FLU5|HIP9_ARATH Heavy metal-associated isoprenylated plant protein 9 OS=Arabidopsis thaliana OX=3702 GN=HIPP09 PE=2 SV=1
LOC_Os03g21110	-2.40418	0.00011884	Down	sp|Q9LQY3|P24D9_ARATH Transmembrane emp24 domain-containing protein p24delta9 OS=Arabidopsis thaliana OX=3702 GN=At1g26690 PE=2 SV=1
LOC_Os10g39800	1.5973	0.000119566	Up	--
LOC_Os01g37040	1.04805	0.000130646	Up	--
LOC_Os06g45340	1.07701	0.000131989	Up	sp|P59724|FKBP3_VICFA FKBP-type peptidyl-prolyl cis-trans isomerase, chloroplastic (Fragment) OS=Vicia faba OX=3906 PE=1 SV=1
LOC_Os08g27980	1.97704	0.000134419	Up	--
LOC_Os07g28610	1.28577	0.000135389	Up	sp|Q8LCA1|CUT1B_ARATH Protein CURVATURE THYLAKOID 1B, chloroplastic OS=Arabidopsis thaliana OX=3702 GN=CURT1B PE=1 SV=2
LOC_Os03g20330	1.19677	0.000136311	Up	--
LOC_Os02g54590	2.30778	0.000136729	Up	sp|Q9FKG6|PUB52_ARATH U-box domain-containing protein 52 OS=Arabidopsis thaliana OX=3702 GN=PUB52 PE=2 SV=1
LOC_Os07g35660	4.03783	0.000136939	Up	sp|Q0D5R3|CRK6_ORYSJ Cysteine-rich receptor-like protein kinase 6 OS=Oryza sativa subsp. japonica OX=39947 GN=CRK6 PE=1 SV=1
LOC_Os08g15149	3.70716	0.000137061	Up	sp|Q9FFF6|DIOX5_ARATH Probable 2-oxoglutarate-dependent dioxygenase At5g05600 OS=Arabidopsis thaliana OX=3702 GN=At5g05600 PE=2 SV=1
LOC_Os01g61340	1.6999	0.000137387	Up	--
LOC_Os12g04320	1.75115	0.000142246	Up	sp|Q9M1V2|SOT5_ARATH Cytosolic sulfotransferase 5 OS=Arabidopsis thaliana OX=3702 GN=SOT5 PE=1 SV=1
LOC_Os10g34940	1.53491	0.000148728	Up	--
LOC_Os12g43990	1.94579	0.000149816	Up	--
LOC_Os12g17710	1.36604	0.000151897	Up	--
LOC_Os01g55660	1.87036	0.000152542	Up	sp|P10978|POLX_TOBAC Retrovirus-related Pol polyprotein from transposon TNT 1-94 OS=Nicotiana tabacum OX=4097 PE=2 SV=1
LOC_Os03g50670	4.9936	0.000154132	Up	--
LOC_Os01g41400	1.9383	0.000155074	Up	sp|F4J1Q9|AVT1I_ARATH Amino acid transporter AVT1I OS=Arabidopsis thaliana OX=3702 GN=AVT1I PE=3 SV=1
LOC_Os11g05490	1.19316	0.000160583	Up	--
LOC_Os06g06150	1.66089	0.000161377	Up	sp|Q8LGA5|ATL31_ARATH E3 ubiquitin-protein ligase ATL31 OS=Arabidopsis thaliana OX=3702 GN=ATL31 PE=1 SV=2
LOC_Os09g01780	4.25671	0.000169735	Up	sp|Q9SZL8|FRS5_ARATH Protein FAR1-RELATED SEQUENCE 5 OS=Arabidopsis thaliana OX=3702 GN=FRS5 PE=1 SV=1
LOC_Os07g05940	-2.78411	0.000173886	Down	sp|Q69NX5|NCED4_ORYSJ 9-cis-epoxycarotenoid dioxygenase NCED4, chloroplastic OS=Oryza sativa subsp. japonica OX=39947 GN=NCED4 PE=2 SV=1
LOC_Os09g36580	1.60607	0.000175715	Up	sp|A0A1P8B554|THLP1_ARATH Thaumatin-like protein 1 OS=Arabidopsis thaliana OX=3702 GN=TLP1 PE=2 SV=1
LOC_Os01g02010	-3.37059	0.000176419	Down	--
LOC_Os05g40620	2.77469	0.000176608	Up	--
LOC_Os01g41790	3.95731	0.000177262	Up	--
LOC_Os04g43380	1.90913	0.000179875	Up	sp|Q7XPY5|BGL15_ORYSJ Putative beta-glucosidase 15 OS=Oryza sativa subsp. japonica OX=39947 GN=BGLU15 PE=5 SV=2
LOC_Os05g47690	1.89773	0.000180199	Up	sp|Q9LJQ5|RTNLI_ARATH Reticulon-like protein B9 OS=Arabidopsis thaliana OX=3702 GN=RTNLB9 PE=2 SV=1
LOC_Os01g39399	6.03206	0.000180707	Up	--
LOC_Os06g30480	1.03325	0.000180707	Up	--
LOC_Os04g52310	2.8656	0.000183987	Up	sp|Q7XLD4|ZIP3_ORYSJ Zinc transporter 3 OS=Oryza sativa subsp. japonica OX=39947 GN=ZIP3 PE=1 SV=2
LOC_Os03g01520	1.063	0.000185183	Up	--
LOC_Os05g19000	1.87425	0.000185228	Up	--
LOC_Os01g50400	-1.18988	0.00019592	Down	sp|O80888|M3K17_ARATH Mitogen-activated protein kinase kinase kinase 17 OS=Arabidopsis thaliana OX=3702 GN=MAPKKK17 PE=1 SV=1
LOC_Os02g36770	3.39161	0.000195967	Up	sp|Q8L7F9|B3GTF_ARATH Beta-1,3-galactosyltransferase GALT1 OS=Arabidopsis thaliana OX=3702 GN=GALT1 PE=1 SV=1
LOC_Os03g27590	1.1172	0.000196156	Up	sp|Q67Y83|SCP51_ARATH Serine carboxypeptidase-like 51 OS=Arabidopsis thaliana OX=3702 GN=SCPL51 PE=2 SV=2
LOC_Os04g45310	1.45637	0.0001983	Up	--
LOC_Os07g07940	1.71072	0.000198719	Up	--
LOC_Os01g56690	-5.8359	0.000204944	Down	sp|Q75KV9|BH148_ORYSJ Transcription factor BHLH148 OS=Oryza sativa subsp. japonica OX=39947 GN=BHLH148 PE=1 SV=1
LOC_Os07g48770	1.48088	0.000206857	Up	sp|Q94AC1|STR6_ARATH Rhodanese-like domain-containing protein 6 OS=Arabidopsis thaliana OX=3702 GN=STR6 PE=2 SV=1
LOC_Os01g42900	1.3895	0.000207026	Up	sp|Q9MAH4|AB10G_ARATH ABC transporter G family member 10 OS=Arabidopsis thaliana OX=3702 GN=ABCG10 PE=3 SV=1
LOC_Os01g68650	-1.33991	0.000208848	Down	--
LOC_Os12g32290	1.8664	0.000211066	Up	--
LOC_Os01g03549	1.32993	0.000212592	Up	sp|Q5ZE07|LPR2_ORYSJ Multicopper oxidase LPR1 homolog 2 OS=Oryza sativa subsp. japonica OX=39947 GN=LPR2 PE=2 SV=1
LOC_Os06g13620	-5.84167	0.00021426	Down	--
LOC_Os02g06820	1.73257	0.000219823	Up	sp|Q9ZVC9|FRS3_ARATH Protein FAR1-RELATED SEQUENCE 3 OS=Arabidopsis thaliana OX=3702 GN=FRS3 PE=1 SV=2
LOC_Os02g22020	-1.6058	0.000220568	Down	sp|Q6Z869|NIGT1_ORYSJ Transcription factor NIGT1 OS=Oryza sativa subsp. japonica OX=39947 GN=NIGT1 PE=2 SV=1
LOC_Os02g18080	2.49254	0.00022489	Up	sp|Q9LRR4|R13L1_ARATH Putative disease resistance RPP13-like protein 1 OS=Arabidopsis thaliana OX=3702 GN=RPPL1 PE=3 SV=1
LOC_Os07g26410	-1.76843	0.000225876	Down	--
LOC_Os11g47870	1.48437	0.000226699	Up	sp|O80933|SCL9_ARATH Scarecrow-like protein 9 OS=Arabidopsis thaliana OX=3702 GN=SCL9 PE=2 SV=1
LOC_Os01g73980	5.94131	0.000246238	Up	sp|Q9LM66|XCP2_ARATH Cysteine protease XCP2 OS=Arabidopsis thaliana OX=3702 GN=XCP2 PE=1 SV=2
LOC_Os04g40530	3.02657	0.000248337	Up	--
LOC_Os01g66610	1.43131	0.000252199	Up	sp|O64477|Y2913_ARATH G-type lectin S-receptor-like serine/threonine-protein kinase At2g19130 OS=Arabidopsis thaliana OX=3702 GN=At2g19130 PE=2 SV=1
LOC_Os12g06080	-1.00134	0.000252488	Down	sp|Q53QI0|Y1160_ORYSJ B3 domain-containing protein Os11g0156000 OS=Oryza sativa subsp. japonica OX=39947 GN=Os11g0156000 PE=2 SV=1
LOC_Os07g41670	1.05978	0.000256154	Up	sp|P03010|TRAC9_MAIZE Putative AC9 transposase OS=Zea mays OX=4577 PE=4 SV=1
LOC_Os04g47030	1.74417	0.0002596	Up	--
LOC_Os01g64949	5.97268	0.000265695	Up	--
LOC_Os04g15690	1.07046	0.000274124	Up	--
LOC_Os03g27890	2.78268	0.000275122	Up	--
LOC_Os10g40614	-1.00629	0.000278321	Down	sp|P14009|14KD_DAUCA 14 kDa proline-rich protein DC2.15 OS=Daucus carota OX=4039 PE=2 SV=1
LOC_Os02g36670	1.26442	0.000279448	Up	--
LOC_Os05g02200	1.74927	0.000282486	Up	sp|Q9LV60|CRR55_ARATH Cysteine-rich repeat secretory protein 55 OS=Arabidopsis thaliana OX=3702 GN=CRRSP55 PE=2 SV=1
LOC_Os06g34680	5.48603	0.0002827	Up	sp|Q9M2U3|ALPL_ARATH Protein ALP1-like OS=Arabidopsis thaliana OX=3702 GN=At3g55350 PE=2 SV=1
LOC_Os07g31140	1.10714	0.000282997	Up	sp|Q7F0Q2|POED2_ORYSJ Polyprenol reductase 2 OS=Oryza sativa subsp. japonica OX=39947 GN=Os07g0493400 PE=2 SV=1
LOC_Os07g09590	-1.5003	0.000288507	Down	sp|Q69WS3|BH094_ORYSJ Transcription factor BHLH094 OS=Oryza sativa subsp. japonica OX=39947 GN=BHLH094 PE=1 SV=2
LOC_Os11g37920	2.17935	0.000293309	Up	sp|Q9ZV19|DJ1E_ARATH DJ-1 protein homolog E OS=Arabidopsis thaliana OX=3702 GN=DJ1E PE=1 SV=1
LOC_Os01g02770	1.75467	0.000298748	Up	sp|P93604|LRK10_WHEAT Rust resistance kinase Lr10 OS=Triticum aestivum OX=4565 GN=LRK10 PE=2 SV=1
LOC_Os12g33150	1.10319	0.000300527	Up	--
LOC_Os02g24950	5.85777	0.000300936	Up	--
LOC_Os02g47230	1.00427	0.00030259	Up	sp|Q6ZIK7|BRXL2_ORYSJ Protein Brevis radix-like 2 OS=Oryza sativa subsp. japonica OX=39947 GN=BRXL2 PE=2 SV=1
LOC_Os08g24790	-5.73124	0.000309533	Down	sp|Q9FGK4|B561J_ARATH Cytochrome b561 and DOMON domain-containing protein At5g47530 OS=Arabidopsis thaliana OX=3702 GN=At5g47530 PE=2 SV=1
LOC_Os10g21268	1.58781	0.000310355	Up	sp|Q6ENG6|RBL_ORYNI Ribulose bisphosphate carboxylase large chain OS=Oryza nivara OX=4536 GN=rbcL PE=3 SV=1
LOC_Os06g49720	1.34759	0.000319618	Up	--
LOC_Os02g32780	1.67394	0.000321272	Up	sp|Q9SVP7|PP307_ARATH Pentatricopeptide repeat-containing protein At4g13650 OS=Arabidopsis thaliana OX=3702 GN=PCMP-H42 PE=2 SV=2
LOC_Os04g10260	2.0909	0.000321474	Up	sp|Q9MA75|VIP1_ARATH Transcription factor VIP1 OS=Arabidopsis thaliana OX=3702 GN=VIP1 PE=1 SV=1
LOC_Os02g34360	1.12376	0.000326556	Up	--
LOC_Os01g24790	2.17244	0.000331695	Up	sp|Q8GT21|BEBT_CLABR Benzyl alcohol O-benzoyltransferase OS=Clarkia breweri OX=36903 PE=1 SV=1
LOC_Os04g31720	-1.06592	0.000334811	Down	--
LOC_Os10g26940	1.07845	0.000343552	Up	sp|Q7XES5|BURPG_ORYSJ BURP domain-containing protein 16 OS=Oryza sativa subsp. japonica OX=39947 GN=BURP16 PE=2 SV=1
LOC_Os04g46079	1.23281	0.000344876	Up	--
LOC_Os11g10520	1.18816	0.000345268	Up	sp|Q4R1E8|ADH2_ORYSI Alcohol dehydrogenase 2 OS=Oryza sativa subsp. indica OX=39946 GN=ADH2 PE=2 SV=1
LOC_Os02g27310	3.1172	0.000351844	Up	sp|Q0D5R3|CRK6_ORYSJ Cysteine-rich receptor-like protein kinase 6 OS=Oryza sativa subsp. japonica OX=39947 GN=CRK6 PE=1 SV=1
LOC_Os08g32600	-1.37691	0.000364947	Down	sp|Q40541|NPK1_TOBAC Mitogen-activated protein kinase kinase kinase NPK1 OS=Nicotiana tabacum OX=4097 GN=NPK1 PE=1 SV=1
LOC_Os04g50030	-1.2685	0.000370218	Down	sp|O23620|AHL23_ARATH AT-hook motif nuclear-localized protein 23 OS=Arabidopsis thaliana OX=3702 GN=AHL23 PE=1 SV=1
LOC_Os09g35780	-3.67345	0.000375684	Down	sp|Q58FX0|BAP2_ARATH BON1-associated protein 2 OS=Arabidopsis thaliana OX=3702 GN=BAP2 PE=1 SV=1
LOC_Os09g24810	4.78929	0.000379486	Up	sp|Q6ER22|MIF3_ORYSJ Mini zinc finger protein 2 OS=Oryza sativa subsp. japonica OX=39947 GN=MIF3 PE=3 SV=1
LOC_Os07g43450	1.30111	0.000382079	Up	sp|Q29PU2|SAU76_ARATH Auxin-responsive protein SAUR76 OS=Arabidopsis thaliana OX=3702 GN=SAUR76 PE=1 SV=1
LOC_Os08g29580	-1.4206	0.000390167	Down	--
LOC_Os05g52010	5.78726	0.000390579	Up	--
LOC_Os12g03050	2.00697	0.000394957	Up	sp|Q5CD17|NAC77_ORYSJ NAC domain-containing protein 77 OS=Oryza sativa subsp. japonica OX=39947 GN=NAC077 PE=2 SV=2
LOC_Os02g01510	1.6744	0.000400915	Up	sp|P22988|LDHA_HORVU L-lactate dehydrogenase A OS=Hordeum vulgare OX=4513 PE=1 SV=1
LOC_Os08g20570	1.16002	0.000409842	Up	sp|P60300|CLCG_ARATH Putative chloride channel-like protein CLC-g OS=Arabidopsis thaliana OX=3702 GN=CLC-G PE=1 SV=2
LOC_Os01g10980	-2.64702	0.000418151	Down	sp|Q9FGG3|WTR45_ARATH WAT1-related protein At5g64700 OS=Arabidopsis thaliana OX=3702 GN=At5g64700 PE=2 SV=1
LOC_Os08g01480	-1.0817	0.000421862	Down	sp|Q43257|C71C4_MAIZE indole-2-monooxygenase OS=Zea mays OX=4577 GN=CYP71C4 PE=1 SV=1
LOC_Os11g10460	1.00542	0.000422149	Up	sp|Q9SZH2|PER43_ARATH Peroxidase 43 OS=Arabidopsis thaliana OX=3702 GN=PER43 PE=3 SV=2
LOC_Os01g57610	-1.25048	0.000423136	Down	sp|Q8LQM5|GH31_ORYSJ Probable indole-3-acetic acid-amido synthetase GH3.1 OS=Oryza sativa subsp. japonica OX=39947 GN=GH3.1 PE=2 SV=1
LOC_Os03g05500	-1.72572	0.000429731	Down	sp|Q9M2J7|LBD29_ARATH LOB domain-containing protein 29 OS=Arabidopsis thaliana OX=3702 GN=LBD29 PE=2 SV=1
LOC_Os03g14560	1.9146	0.000432556	Up	sp|O64636|C76C1_ARATH Cytochrome P450 76C1 OS=Arabidopsis thaliana OX=3702 GN=CYP76C1 PE=2 SV=1
LOC_Os03g41920	1.03321	0.000433418	Up	--
LOC_Os09g20420	1.0354	0.000435579	Up	--
LOC_Os01g66830	1.03705	0.000440539	Up	sp|Q84JS1|PAE6_ARATH Pectin acetylesterase 6 OS=Arabidopsis thaliana OX=3702 GN=PAE6 PE=2 SV=1
LOC_Os10g27980	1.33689	0.000453303	Up	sp|F4HW02|GAT1_ARATH GABA transporter 1 OS=Arabidopsis thaliana OX=3702 GN=GAT1 PE=1 SV=1
LOC_Os09g16000	2.07642	0.000463449	Up	sp|Q7XBQ9|RGA2_SOLBU Disease resistance protein RGA2 OS=Solanum bulbocastanum OX=147425 GN=RGA2 PE=1 SV=1
LOC_Os11g33394	3.90338	0.000471749	Up	sp|Q9SD53|Y3720_ARATH UPF0481 protein At3g47200 OS=Arabidopsis thaliana OX=3702 GN=At3g47200 PE=2 SV=1
LOC_Os02g33640	1.90419	0.000477625	Up	--
LOC_Os02g32650	1.19951	0.000479209	Up	--
LOC_Os05g16930	1.14911	0.000484061	Up	sp|C0LGH3|Y5614_ARATH Probable LRR receptor-like serine/threonine-protein kinase At1g56140 OS=Arabidopsis thaliana OX=3702 GN=At1g56140 PE=2 SV=2
LOC_Os11g35590	5.74566	0.000486533	Up	sp|P10978|POLX_TOBAC Retrovirus-related Pol polyprotein from transposon TNT 1-94 OS=Nicotiana tabacum OX=4097 PE=2 SV=1
LOC_Os01g02750	1.89774	0.000491106	Up	sp|P93604|LRK10_WHEAT Rust resistance kinase Lr10 OS=Triticum aestivum OX=4565 GN=LRK10 PE=2 SV=1
LOC_Os03g39710	1.40555	0.000492254	Up	sp|Q851G4|MST2_ORYSJ Sugar transport protein MST2 OS=Oryza sativa subsp. japonica OX=39947 GN=MST2 PE=2 SV=1
LOC_Os01g31800	1.34107	0.000492703	Up	sp|A2WQG7|H2A5_ORYSI Probable histone H2A.5 OS=Oryza sativa subsp. indica OX=39946 GN=OsI_002060 PE=3 SV=1
LOC_Os10g04570	1.79585	0.000498936	Up	sp|Q7XA39|RGA4_SOLBU Putative disease resistance protein RGA4 OS=Solanum bulbocastanum OX=147425 GN=RGA4 PE=2 SV=1
LOC_Os08g36870	-2.46203	0.000509847	Down	--
LOC_Os07g13260	1.45866	0.000510383	Up	sp|Q9M2U1|DOF36_ARATH Dof zinc finger protein DOF3.6 OS=Arabidopsis thaliana OX=3702 GN=DOF3.6 PE=1 SV=2
LOC_Os04g15530	1.62667	0.00051395	Up	sp|Q9SD62|Y3471_ARATH Putative receptor-like protein kinase At3g47110 OS=Arabidopsis thaliana OX=3702 GN=At3g47110 PE=3 SV=1
LOC_Os11g41520	5.32035	0.000514901	Up	--
LOC_Os05g40520	2.52328	0.00051889	Up	--
LOC_Os08g13420	2.43916	0.000524049	Up	sp|Q0JEU6|LERK3_ORYSJ G-type lectin S-receptor-like serine/threonine-protein kinase LECRK3 OS=Oryza sativa subsp. japonica OX=39947 GN=LECRK3 PE=3 SV=2
LOC_Os05g42060	1.05506	0.000528637	Up	sp|Q2V6J9|UFOG7_FRAAN UDP-glucose flavonoid 3-O-glucosyltransferase 7 OS=Fragaria ananassa OX=3747 GN=GT7 PE=1 SV=1
LOC_Os01g22910	1.55397	0.000541448	Up	sp|Q5ZA21|G2OX2_ORYSJ Gibberellin 2-beta-dioxygenase 2 OS=Oryza sativa subsp. japonica OX=39947 GN=GA2OX2 PE=3 SV=1
LOC_Os11g44970	2.63767	0.000542669	Up	sp|Q7XA39|RGA4_SOLBU Putative disease resistance protein RGA4 OS=Solanum bulbocastanum OX=147425 GN=RGA4 PE=2 SV=1
LOC_Os08g38040	1.76812	0.00054346	Up	sp|Q9LNG5|PPP7L_ARATH Serine/threonine-protein phosphatase 7 long form homolog OS=Arabidopsis thaliana OX=3702 GN=MAIL3 PE=2 SV=1
LOC_Os01g73540	1.79057	0.00054631	Up	sp|Q8RWM7|CCB3_ARATH Protein COFACTOR ASSEMBLY OF COMPLEX C SUBUNIT B CCB3, chloroplastic OS=Arabidopsis thaliana OX=3702 GN=CCB3 PE=1 SV=1
LOC_Os10g21070	-1.73963	0.000550988	Down	sp|P93295|M310_ARATH Uncharacterized mitochondrial protein AtMg00310 OS=Arabidopsis thaliana OX=3702 GN=AtMg00310 PE=4 SV=1
LOC_Os03g15460	1.55763	0.000551809	Up	--
LOC_Os01g73480	2.81251	0.000552233	Up	sp|F4IXE7|IDM1_ARATH Increased DNA methylation 1 OS=Arabidopsis thaliana OX=3702 GN=IDM1 PE=1 SV=1
LOC_Os04g30310	-1.51296	0.000555205	Down	--
LOC_Os08g44160	1.07569	0.000555869	Up	--
LOC_Os12g10970	5.74791	0.000560083	Up	--
LOC_Os10g01500	2.33585	0.000563889	Up	--
LOC_Os10g19919	-1.05889	0.000564628	Down	--
LOC_Os05g23200	5.6957	0.000568308	Up	NA
LOC_Os06g38670	2.00114	0.000575116	Up	sp|Q1MX30|XA21_ORYSI Receptor kinase-like protein Xa21 OS=Oryza sativa subsp. indica OX=39946 GN=XA21 PE=1 SV=1
LOC_Os07g02610	5.73435	0.000578313	Up	sp|Q7XA40|RGA3_SOLBU Putative disease resistance protein RGA3 OS=Solanum bulbocastanum OX=147425 GN=RGA3 PE=2 SV=2
LOC_Os03g45390	1.06436	0.00058264	Up	sp|Q6NKW9|E138_ARATH Glucan endo-1,3-beta-glucosidase 8 OS=Arabidopsis thaliana OX=3702 GN=At1g64760 PE=2 SV=2
LOC_Os04g56230	1.22353	0.000599678	Up	sp|P49353|FPPS_MAIZE Farnesyl pyrophosphate synthase OS=Zea mays OX=4577 GN=FPS PE=2 SV=1
LOC_Os01g68050	1.209	0.000622154	Up	sp|P92962|PROT2_ARATH Proline transporter 2 OS=Arabidopsis thaliana OX=3702 GN=PROT2 PE=1 SV=1
LOC_Os02g27200	3.67737	0.000624231	Up	sp|O81815|MO1_ARATH Monooxygenase 1 OS=Arabidopsis thaliana OX=3702 GN=MO1 PE=2 SV=1
LOC_Os09g28230	2.91143	0.000632733	Up	sp|Q5NUF4|HIDM_GLYEC 2-hydroxyisoflavanone dehydratase OS=Glycyrrhiza echinata OX=46348 GN=HIDM PE=1 SV=1
LOC_Os04g43519	2.37972	0.000638569	Up	--
LOC_Os02g02830	1.15206	0.00063929	Up	sp|Q94F47|UBC28_ARATH Ubiquitin-conjugating enzyme E2 28 OS=Arabidopsis thaliana OX=3702 GN=UBC28 PE=1 SV=1
LOC_Os06g17450	1.01516	0.000645942	Up	--
LOC_Os01g74140	1.43199	0.000645942	Up	sp|Q9FHR7|WRK49_ARATH Probable WRKY transcription factor 49 OS=Arabidopsis thaliana OX=3702 GN=WRKY49 PE=2 SV=1
LOC_Os05g27100	1.13875	0.000648963	Up	--
LOC_Os04g59200	5.67186	0.000650574	Up	sp|P84516|PER1_SORBI Cationic peroxidase SPC4 OS=Sorghum bicolor OX=4558 GN=Sb03g046810 PE=1 SV=2
LOC_Os10g30770	-5.55743	0.000650655	Down	sp|Q7XDZ7|PHT13_ORYSJ Probable inorganic phosphate transporter 1-3 OS=Oryza sativa subsp. japonica OX=39947 GN=PHT1-3 PE=2 SV=1
LOC_Os09g19310	2.54795	0.00065132	Up	sp|Q2QZF1|PIK6_ORYSJ Disease resistance protein PIK6-NP OS=Oryza sativa subsp. japonica OX=39947 GN=PIK6-NP PE=2 SV=1
LOC_Os01g22370	1.1217	0.000678672	Up	sp|A5H8G4|PER1_MAIZE Peroxidase 1 OS=Zea mays OX=4577 GN=PER1 PE=1 SV=1
LOC_Os11g07480	3.00686	0.000683098	Up	--
LOC_Os08g03770	2.36758	0.000693466	Up	--
LOC_Os11g08569	2.13438	0.000697745	Up	sp|H2KWF1|PAKSY_ORYSJ Parkeol synthase OS=Oryza sativa subsp. japonica OX=39947 GN=Os11g0189600 PE=1 SV=1
LOC_Os12g24790	1.50275	0.000697745	Up	--
LOC_Os07g43800	1.28251	0.000699449	Up	sp|Q93Z27|CML46_ARATH Probable calcium-binding protein CML46 OS=Arabidopsis thaliana OX=3702 GN=CML46 PE=1 SV=1
LOC_Os08g10150	2.28721	0.000723816	Up	sp|C0LGH3|Y5614_ARATH Probable LRR receptor-like serine/threonine-protein kinase At1g56140 OS=Arabidopsis thaliana OX=3702 GN=At1g56140 PE=2 SV=2
LOC_Os01g19529	3.70587	0.00073782	Up	sp|Q9FZ24|PPR4_ARATH Pentatricopeptide repeat-containing protein At1g02370, mitochondrial OS=Arabidopsis thaliana OX=3702 GN=At1g02370 PE=2 SV=1
LOC_Os07g35390	1.99147	0.000739025	Up	sp|Q0D5R3|CRK6_ORYSJ Cysteine-rich receptor-like protein kinase 6 OS=Oryza sativa subsp. japonica OX=39947 GN=CRK6 PE=1 SV=1
LOC_Os10g04490	3.64942	0.000745317	Up	sp|Q7XBQ9|RGA2_SOLBU Disease resistance protein RGA2 OS=Solanum bulbocastanum OX=147425 GN=RGA2 PE=1 SV=1
LOC_Os03g20970	1.9637	0.000745325	Up	sp|P98204|ALA1_ARATH Phospholipid-transporting ATPase 1 OS=Arabidopsis thaliana OX=3702 GN=ALA1 PE=2 SV=1
LOC_Os01g12770	2.05395	0.000745649	Up	sp|A0A068Q6L2|C7317_PRUMU Cytochrome P450 736A117 OS=Prunus mume OX=102107 GN=CYP736A117 PE=2 SV=1
LOC_Os08g38960	1.46084	0.000746804	Up	--
LOC_Os03g42600	2.90184	0.000747115	Up	--
LOC_Os04g25060	3.73184	0.000755187	Up	sp|Q0D5R3|CRK6_ORYSJ Cysteine-rich receptor-like protein kinase 6 OS=Oryza sativa subsp. japonica OX=39947 GN=CRK6 PE=1 SV=1
LOC_Os03g64280	1.21821	0.000756974	Up	sp|Q84TC2|BX6_MAIZE DIBOA-glucoside dioxygenase BX6 OS=Zea mays OX=4577 GN=BX6 PE=1 SV=1
LOC_Os07g42310	1.01906	0.000763254	Up	--
LOC_Os05g50700	-1.41632	0.000764723	Down	sp|O04609|WRK22_ARATH WRKY transcription factor 22 OS=Arabidopsis thaliana OX=3702 GN=WRKY22 PE=2 SV=1
LOC_Os09g19930	-1.04392	0.000766774	Down	sp|Q9S746|HTH_ARATH Protein HOTHEAD OS=Arabidopsis thaliana OX=3702 GN=HTH PE=1 SV=1
LOC_Os11g34710	-1.71457	0.000767336	Down	sp|Q8H129|PPA3_ARATH Purple acid phosphatase 3 OS=Arabidopsis thaliana OX=3702 GN=PAP3 PE=2 SV=1
LOC_Os01g02600	2.14124	0.000774066	Up	sp|P93604|LRK10_WHEAT Rust resistance kinase Lr10 OS=Triticum aestivum OX=4565 GN=LRK10 PE=2 SV=1
LOC_Os03g53640	1.6186	0.000778052	Up	sp|Q9ZVZ9|PB27B_ARATH Photosystem II D1 precursor processing protein PSB27-H2, chloroplastic OS=Arabidopsis thaliana OX=3702 GN=PSB27-2 PE=1 SV=1
LOC_Os01g71700	1.67026	0.000785114	Up	sp|B9EXZ6|BAT1_ORYSJ Amino-acid permease BAT1 homolog OS=Oryza sativa subsp. japonica OX=39947 GN=BAT1 PE=2 SV=1
LOC_Os03g52720	1.55385	0.000796468	Up	--
LOC_Os05g26490	1.76492	0.000815694	Up	sp|P0C5E5|PRO7_ORYSI Prolamin PPROL 14E OS=Oryza sativa subsp. indica OX=39946 PE=3 SV=1
LOC_Os08g38280	1.14067	0.00082529	Up	--
LOC_Os05g42250	1.26589	0.000840938	Up	sp|Q94AS9|CNGC4_ARATH Cyclic nucleotide-gated ion channel 4 OS=Arabidopsis thaliana OX=3702 GN=CNGC4 PE=2 SV=2
LOC_Os04g12690	5.59547	0.000865923	Up	sp|Q7XT97|UGT79_ORYSJ UDP-glycosyltransferase 79 OS=Oryza sativa subsp. japonica OX=39947 GN=UGT79 PE=1 SV=2
LOC_Os03g10570	2.10327	0.000871972	Up	sp|Q76CY8|PAIR2_ORYSJ Meiosis-specific protein PAIR2 OS=Oryza sativa subsp. japonica OX=39947 GN=PAIR2 PE=2 SV=1
LOC_Os07g17460	1.84594	0.000874908	Up	sp|Q8LF09|FDL23_ARATH F-box/FBD/LRR-repeat protein At4g00160 OS=Arabidopsis thaliana OX=3702 GN=At4g00160 PE=2 SV=2
LOC_Os04g33450	-1.15835	0.000876389	Down	--
LOC_Os01g22980	1.84991	0.000879255	Up	sp|Q5W727|SCP26_ORYSJ Serine carboxypeptidase-like 26 OS=Oryza sativa subsp. japonica OX=39947 GN=SCP26 PE=2 SV=1
LOC_Os07g03000	1.14279	0.000906219	Up	sp|Q9SD62|Y3471_ARATH Putative receptor-like protein kinase At3g47110 OS=Arabidopsis thaliana OX=3702 GN=At3g47110 PE=3 SV=1
LOC_Os06g10610	1.07667	0.000914561	Up	--
LOC_Os06g50290	5.5946	0.00091683	Up	sp|Q9M2U3|ALPL_ARATH Protein ALP1-like OS=Arabidopsis thaliana OX=3702 GN=At3g55350 PE=2 SV=1
LOC_Os01g55520	-2.10757	0.000917395	Down	sp|Q9M811|ROGFB_ARATH Rop guanine nucleotide exchange factor 11 OS=Arabidopsis thaliana OX=3702 GN=ROPGEF11 PE=1 SV=2
LOC_Os01g07050	1.38944	0.000930023	Up	sp|P93013|AGP30_ARATH Non-classical arabinogalactan protein 30 OS=Arabidopsis thaliana OX=3702 GN=AGP30 PE=2 SV=1
LOC_Os01g03330	-1.14325	0.000934823	Down	sp|Q0JR25|IBBR_ORYSJ Bowman-Birk type bran trypsin inhibitor OS=Oryza sativa subsp. japonica OX=39947 GN=RBBI3.3 PE=1 SV=2
LOC_Os11g27795	5.63855	0.000961835	Up	--
LOC_Os03g02190	1.60133	0.000976083	Up	sp|A2XW02|STRK1_ORYSI Salt tolerance receptor-like cytoplasmic kinase 1 OS=Oryza sativa subsp. indica OX=39946 GN=OsI_16820 PE=2 SV=1
LOC_Os11g29990	2.35927	0.000983859	Up	sp|Q9LRR4|R13L1_ARATH Putative disease resistance RPP13-like protein 1 OS=Arabidopsis thaliana OX=3702 GN=RPPL1 PE=3 SV=1
LOC_Os01g42330	1.49651	0.000998859	Up	sp|Q7XA42|RGA1_SOLBU Putative disease resistance protein RGA1 OS=Solanum bulbocastanum OX=147425 GN=RGA1 PE=2 SV=2
LOC_Os03g29250	-1.69162	0.000999937	Down	sp|A2XHU0|SPX5_ORYSI SPX domain-containing protein 5 OS=Oryza sativa subsp. indica OX=39946 GN=SPX5 PE=4 SV=1
LOC_Os03g56100	1.7416	0.00103473	Up	sp|Q8W4M7|ERCC2_ARATH General transcription and DNA repair factor IIH helicase subunit XPD OS=Arabidopsis thaliana OX=3702 GN=XPD PE=1 SV=1
LOC_Os07g35280	1.00681	0.00104615	Up	sp|Q0D5R3|CRK6_ORYSJ Cysteine-rich receptor-like protein kinase 6 OS=Oryza sativa subsp. japonica OX=39947 GN=CRK6 PE=1 SV=1
LOC_Os08g36110	-1.11741	0.00105056	Down	sp|Q84WI0|GIS_ARATH Zinc finger protein GIS OS=Arabidopsis thaliana OX=3702 GN=GIS PE=1 SV=1
LOC_Os09g29310	1.43665	0.00105804	Up	sp|Q8RXX9|ATL6_ARATH E3 ubiquitin-protein ligase ATL6 OS=Arabidopsis thaliana OX=3702 GN=ATL6 PE=1 SV=2
LOC_Os07g35880	1.91226	0.00105875	Up	sp|O22585|AMYB_MEDSA Beta-amylase OS=Medicago sativa OX=3879 GN=BMY1 PE=2 SV=1
LOC_Os10g36626	-1.13407	0.00106887	Down	--
LOC_Os07g42560	4.54117	0.00108063	Up	sp|Q9FHE1|GSTT3_ARATH Glutathione S-transferase T3 OS=Arabidopsis thaliana OX=3702 GN=GSTT3 PE=2 SV=1
LOC_Os07g03020	1.113	0.00112388	Up	--
LOC_Os10g39430	1.74178	0.00114018	Up	sp|Q9C8E6|PMI1_ARATH Protein PLASTID MOVEMENT IMPAIRED 1 OS=Arabidopsis thaliana OX=3702 GN=PMI1 PE=1 SV=1
LOC_Os03g10740	1.03975	0.00114188	Up	--
LOC_Os01g14670	-1.48309	0.00116252	Down	sp|Q6I544|GL52_ORYSJ Germin-like protein 5-1 OS=Oryza sativa subsp. japonica OX=39947 GN=Os05g0277500 PE=2 SV=1
LOC_Os01g62830	1.3595	0.00117563	Up	--
LOC_Os05g04500	-3.47599	0.00118138	Down	sp|A7QEU4|PER5_VITVI Peroxidase 5 OS=Vitis vinifera OX=29760 GN=GSVIVT00037159001 PE=1 SV=2
LOC_Os04g02880	1.0243	0.00119019	Up	--
LOC_Os11g35620	5.60804	0.00119201	Up	--
LOC_Os03g37920	2.67925	0.00121354	Up	sp|Q9SZL8|FRS5_ARATH Protein FAR1-RELATED SEQUENCE 5 OS=Arabidopsis thaliana OX=3702 GN=FRS5 PE=1 SV=1
LOC_Os07g37045	1.88918	0.00122427	Up	--
LOC_Os12g41810	1.21652	0.00122545	Up	sp|Q5BQN5|WAP_SOLLC WPP domain-associated protein (Fragment) OS=Solanum lycopersicum OX=4081 GN=WAP PE=1 SV=1
LOC_Os05g14320	-5.40397	0.001233	Down	--
LOC_Os02g42080	1.6823	0.00123667	Up	sp|P92523|M860_ARATH Uncharacterized mitochondrial protein AtMg00860 OS=Arabidopsis thaliana OX=3702 GN=AtMg00860 PE=4 SV=1
LOC_Os12g32390	2.62591	0.00125318	Up	--
LOC_Os01g66000	1.13991	0.00127536	Up	sp|Q9LVM2|NDHN_ARATH NAD(P)H-quinone oxidoreductase subunit N, chloroplastic OS=Arabidopsis thaliana OX=3702 GN=ndhN PE=2 SV=1
LOC_Os02g16940	1.83355	0.00127754	Up	sp|Q9MAP7|SBT35_ARATH Subtilisin-like protease SBT3.5 OS=Arabidopsis thaliana OX=3702 GN=SBT3.5 PE=1 SV=1
LOC_Os06g21950	-2.81842	0.00127841	Down	sp|Q69T94|PT110_ORYSJ Probable inorganic phosphate transporter 1-10 OS=Oryza sativa subsp. japonica OX=39947 GN=PHT1-10 PE=2 SV=1
LOC_Os05g47750	1.5558	0.00127984	Up	sp|Q9FF31|LRL21_ARATH LEAF RUST 10 DISEASE-RESISTANCE LOCUS RECEPTOR-LIKE PROTEIN KINASE-like 2.1 OS=Arabidopsis thaliana OX=3702 GN=LRK10L-2.1 PE=3 SV=1
LOC_Os05g39600	1.02088	0.00128036	Up	sp|Q9SIT5|CHX15_ARATH Cation/H(+) antiporter 15 OS=Arabidopsis thaliana OX=3702 GN=CHX15 PE=2 SV=1
LOC_Os10g42850	1.86646	0.00130146	Up	sp|O64747|WRK35_ARATH Probable WRKY transcription factor 35 OS=Arabidopsis thaliana OX=3702 GN=WRKY35 PE=2 SV=1
LOC_Os03g26010	-1.51637	0.001304	Down	--
LOC_Os11g44580	1.27153	0.00133223	Up	sp|Q7XA40|RGA3_SOLBU Putative disease resistance protein RGA3 OS=Solanum bulbocastanum OX=147425 GN=RGA3 PE=2 SV=2
LOC_Os08g42670	1.7296	0.00134257	Up	sp|P0DO07|PIK2_ORYSJ Disease resistance protein Pik-2 OS=Oryza sativa subsp. japonica OX=39947 GN=PIK-2 PE=3 SV=1
LOC_Os04g11820	1.08386	0.00137609	Up	sp|Q9FF46|AB28G_ARATH ABC transporter G family member 28 OS=Arabidopsis thaliana OX=3702 GN=ABCG28 PE=3 SV=1
LOC_Os06g09990	1.11335	0.00137744	Up	--
LOC_Os02g51820	1.11299	0.00138998	Up	--
LOC_Os05g51620	1.0044	0.00141592	Up	--
LOC_Os07g37710	2.31692	0.00141857	Up	--
LOC_Os11g12140	2.87068	0.00141857	Up	--
LOC_Os11g35500	2.30063	0.00142051	Up	sp|Q1MX30|XA21_ORYSI Receptor kinase-like protein Xa21 OS=Oryza sativa subsp. indica OX=39946 GN=XA21 PE=1 SV=1
LOC_Os09g19800	2.16111	0.00145963	Up	sp|Q6K4E7|APM1D_ORYSJ Aminopeptidase M1-D OS=Oryza sativa subsp. japonica OX=39947 GN=Os09g0362800 PE=2 SV=1
LOC_Os04g22900	1.04679	0.00149401	Up	sp|Q5U9T2|LECH_HORVU Horcolin OS=Hordeum vulgare OX=4513 PE=3 SV=1
LOC_Os05g25770	-1.1241	0.00149899	Down	sp|Q9LY00|WRK70_ARATH Probable WRKY transcription factor 70 OS=Arabidopsis thaliana OX=3702 GN=WRKY70 PE=1 SV=1
LOC_Os10g38206	1.90121	0.00150275	Up	sp|Q6ENG9|NU3C_ORYNI NAD(P)H-quinone oxidoreductase subunit 3, chloroplastic OS=Oryza nivara OX=4536 GN=ndhC PE=3 SV=1
LOC_Os06g46250	-1.1196	0.00150647	Down	--
LOC_Os07g10680	1.41125	0.00152914	Up	sp|P35336|PGLR_ACTDE Polygalacturonase OS=Actinidia deliciosa OX=3627 PE=2 SV=1
LOC_Os05g27050	1.51696	0.00153953	Up	sp|Q8VZR7|PTR30_ARATH Protein NRT1/ PTR FAMILY 5.1 OS=Arabidopsis thaliana OX=3702 GN=NPF5.1 PE=2 SV=2
LOC_Os05g30250	1.12524	0.00154514	Up	sp|Q0DIT2|BGL19_ORYSJ Beta-glucosidase 19 OS=Oryza sativa subsp. japonica OX=39947 GN=BGLU19 PE=2 SV=1
LOC_Os11g03280	-2.80314	0.00154533	Down	sp|Q9SSQ4|FRS6_ARATH Protein FAR1-RELATED SEQUENCE 6 OS=Arabidopsis thaliana OX=3702 GN=FRS6 PE=2 SV=1
LOC_Os04g49194	2.21855	0.0015517	Up	sp|Q8W2X5|FL3H2_ORYSJ Flavanone 3-dioxygenase 2 OS=Oryza sativa subsp. japonica OX=39947 GN=F3H-2 PE=1 SV=1
LOC_Os12g25180	1.81561	0.00155415	Up	sp|Q9LK32|Y3721_ARATH Uncharacterized protein At3g27210 OS=Arabidopsis thaliana OX=3702 GN=Y-2 PE=1 SV=1
LOC_Os05g11580	-4.46674	0.00156914	Down	--
LOC_Os03g14880	1.62618	0.00159647	Up	--
LOC_Os01g42110	1.67323	0.00160454	Up	sp|Q8LR09|SWT6A_ORYSJ Bidirectional sugar transporter SWEET6a OS=Oryza sativa subsp. japonica OX=39947 GN=SWEET6A PE=3 SV=1
LOC_Os09g32870	1.00537	0.00163526	Up	--
LOC_Os04g47480	-1.35255	0.00165187	Down	sp|A0A178VBJ0|APSR1_ARATH Protein ALTERED PHOSPHATE STARVATION RESPONSE 1 OS=Arabidopsis thaliana OX=3702 GN=APSR1 PE=2 SV=1
LOC_Os08g38050	1.78168	0.00166115	Up	--
LOC_Os01g65210	1.24046	0.00166462	Up	sp|Q0WP01|PTR9_ARATH Protein NRT1/ PTR FAMILY 5.10 OS=Arabidopsis thaliana OX=3702 GN=NPF5.10 PE=2 SV=1
LOC_Os01g02710	1.56063	0.00168162	Up	sp|P93604|LRK10_WHEAT Rust resistance kinase Lr10 OS=Triticum aestivum OX=4565 GN=LRK10 PE=2 SV=1
LOC_Os12g16000	-5.33111	0.00168544	Down	--
LOC_Os01g02450	4.42421	0.0017073	Up	--
LOC_Os05g24780	-1.73222	0.00172265	Down	sp|Q0DJ94|CML21_ORYSJ Probable calcium-binding protein CML21 OS=Oryza sativa subsp. japonica OX=39947 GN=CML21 PE=2 SV=2
LOC_Os06g31960	-4.9219	0.00173168	Down	sp|P09617|THN5_HORVU Leaf-specific thionin OS=Hordeum vulgare OX=4513 GN=THI1.5 PE=2 SV=2
LOC_Os03g07450	-1.74968	0.00173653	Down	sp|Q8S7W9|HOX21_ORYSJ Homeobox-leucine zipper protein HOX21 OS=Oryza sativa subsp. japonica OX=39947 GN=HOX21 PE=2 SV=1
LOC_Os03g58380	2.80464	0.00174207	Up	sp|Q852M2|ALDO3_ORYSJ Probable aldehyde oxidase 3 OS=Oryza sativa subsp. japonica OX=39947 GN=Os03g0790700 PE=2 SV=1
LOC_Os03g37411	-1.03618	0.00174284	Down	sp|Q9LVD9|DTX40_ARATH Protein DETOXIFICATION 40 OS=Arabidopsis thaliana OX=3702 GN=DTX40 PE=1 SV=1
LOC_Os05g03610	1.17251	0.00175134	Up	sp|Q39033|PLCD2_ARATH Phosphoinositide phospholipase C 2 OS=Arabidopsis thaliana OX=3702 GN=PLC2 PE=1 SV=1
LOC_Os07g22770	5.43549	0.00175232	Up	sp|Q8LDC8|ERF92_ARATH Ethylene-responsive transcription factor 1B OS=Arabidopsis thaliana OX=3702 GN=ERF1B PE=1 SV=2
LOC_Os04g01850	1.05292	0.00176942	Up	--
LOC_Os12g06960	3.50376	0.00176987	Up	--
LOC_Os10g42670	1.13578	0.0017728	Up	sp|Q8L7H3|XTH29_ARATH Probable xyloglucan endotransglucosylase/hydrolase protein 29 OS=Arabidopsis thaliana OX=3702 GN=XTH29 PE=2 SV=1
LOC_Os11g42490	1.00838	0.00178488	Up	--
LOC_Os09g15570	-1.33104	0.00178576	Down	--
LOC_Os10g31290	1.91832	0.00180566	Up	--
LOC_Os04g44420	-1.34505	0.00180707	Down	sp|Q9FMX7|NIC2_ARATH Nicotinamidase 2 OS=Arabidopsis thaliana OX=3702 GN=NIC2 PE=1 SV=1
LOC_Os02g30240	2.05934	0.0018322	Up	--
LOC_Os01g06220	1.64275	0.00185354	Up	sp|Q9FG13|CXE15_ARATH Probable carboxylesterase 15 OS=Arabidopsis thaliana OX=3702 GN=CXE15 PE=2 SV=1
LOC_Os02g25670	-1.4664	0.00185679	Down	--
LOC_Os11g45200	3.84543	0.00186063	Up	sp|P92523|M860_ARATH Uncharacterized mitochondrial protein AtMg00860 OS=Arabidopsis thaliana OX=3702 GN=AtMg00860 PE=4 SV=1
LOC_Os11g37210	1.42951	0.00188145	Up	--
LOC_Os07g23040	1.884	0.00188798	Up	--
LOC_Os06g30920	-1.34793	0.00189028	Down	NA
LOC_Os01g42580	5.40484	0.00189315	Up	--
LOC_Os05g39920	1.03852	0.00193318	Up	sp|Q9ZT94|POLR2_ARATH Retrovirus-related Pol polyprotein from transposon RE2 OS=Arabidopsis thaliana OX=3702 GN=RE2 PE=4 SV=1
LOC_Os01g69840	1.11162	0.00196127	Up	--
LOC_Os10g30240	-1.77294	0.00197153	Down	--
LOC_Os01g52380	5.38732	0.00198831	Up	sp|Q7XA40|RGA3_SOLBU Putative disease resistance protein RGA3 OS=Solanum bulbocastanum OX=147425 GN=RGA3 PE=2 SV=2
LOC_Os05g18870	5.42458	0.00199876	Up	--
LOC_Os04g29000	-1.80947	0.00200045	Down	sp|Q9M1V2|SOT5_ARATH Cytosolic sulfotransferase 5 OS=Arabidopsis thaliana OX=3702 GN=SOT5 PE=1 SV=1
LOC_Os09g16030	-1.08637	0.0020483	Down	sp|Q9ZVX4|U90A1_ARATH UDP-glycosyltransferase 90A1 OS=Arabidopsis thaliana OX=3702 GN=UGT90A1 PE=2 SV=1
LOC_Os09g15830	1.60247	0.0020586	Up	--
LOC_Os03g22620	2.63433	0.00210456	Up	sp|Q5GJ59|TPS7_MAIZE Tau-cadinol synthase OS=Zea mays OX=4577 GN=TPS7 PE=1 SV=1
LOC_Os05g43120	1.18884	0.00215471	Up	sp|Q9FJ45|GDL83_ARATH GDSL esterase/lipase At5g45910 OS=Arabidopsis thaliana OX=3702 GN=At5g45910 PE=2 SV=1
LOC_Os06g22990	2.12704	0.00218619	Up	--
LOC_Os04g19870	-1.86841	0.00218647	Down	--
LOC_Os03g42850	2.47575	0.00223151	Up	--
LOC_Os02g04945	1.01361	0.0022326	Up	sp|F4J4C8|EVN_ARATH Dolichol kinase EVAN OS=Arabidopsis thaliana OX=3702 GN=EVN PE=2 SV=1
LOC_Os08g34100	5.36744	0.00225823	Up	--
LOC_Os07g38250	3.09009	0.00226851	Up	sp|Q9LXA5|LRK91_ARATH L-type lectin-domain containing receptor kinase IX.1 OS=Arabidopsis thaliana OX=3702 GN=LECRK91 PE=1 SV=1
LOC_Os01g03310	1.76859	0.00227968	Up	sp|A2WK50|IBBR_ORYSI Bowman-Birk type bran trypsin inhibitor OS=Oryza sativa subsp. indica OX=39946 GN=RBBI3.3 PE=2 SV=2
LOC_Os01g71830	1.61549	0.0022868	Up	sp|Q02438|E13E_HORVU Glucan endo-1,3-beta-glucosidase GV OS=Hordeum vulgare OX=4513 PE=2 SV=2
LOC_Os12g16540	1.88535	0.0022902	Up	sp|Q9LMN8|WAK3_ARATH Wall-associated receptor kinase 3 OS=Arabidopsis thaliana OX=3702 GN=WAK3 PE=2 SV=2
LOC_Os10g33410	-1.56805	0.0022972	Down	--
LOC_Os07g03970	4.93346	0.00232437	Up	sp|Q7XUN6|SIT2_ORYSJ L-type lectin-domain containing receptor kinase SIT2 OS=Oryza sativa subsp. japonica OX=39947 GN=SIT2 PE=2 SV=2
LOC_Os07g32406	1.73429	0.00233602	Up	sp|Q9SK32|MAIL1_ARATH Protein MAIN-LIKE 1 OS=Arabidopsis thaliana OX=3702 GN=MAIL1 PE=2 SV=1
LOC_Os11g43320	-1.59074	0.00234296	Down	sp|Q2QZF1|PIK6_ORYSJ Disease resistance protein PIK6-NP OS=Oryza sativa subsp. japonica OX=39947 GN=PIK6-NP PE=2 SV=1
LOC_Os02g41810	1.0761	0.00241899	Up	--
LOC_Os08g17160	-1.42325	0.00242932	Down	sp|Q8LC95|ENL3_ARATH Early nodulin-like protein 3 OS=Arabidopsis thaliana OX=3702 GN=At5g25090 PE=2 SV=2
LOC_Os06g11270	1.79802	0.00244144	Up	sp|Q9LTA3|U91C1_ARATH UDP-glycosyltransferase 91C1 OS=Arabidopsis thaliana OX=3702 GN=UGT91C1 PE=2 SV=1
LOC_Os05g33140	-1.01825	0.00244399	Down	sp|Q688M5|CHI9_ORYSJ Chitinase 9 OS=Oryza sativa subsp. japonica OX=39947 GN=Cht9 PE=2 SV=1
LOC_Os10g28310	-2.52802	0.00244469	Down	sp|P31843|RRPO_OENBE RNA-directed DNA polymerase homolog OS=Oenothera berteroana OX=3950 PE=4 SV=1
LOC_Os08g08580	-1.3498	0.00244654	Down	--
LOC_Os10g39030	1.58137	0.00253336	Up	sp|Q38897|BEL1_ARATH Homeobox protein BEL1 homolog OS=Arabidopsis thaliana OX=3702 GN=BEL1 PE=1 SV=2
LOC_Os10g04730	5.33421	0.00254542	Up	sp|O65479|CRK20_ARATH Putative cysteine-rich receptor-like protein kinase 20 OS=Arabidopsis thaliana OX=3702 GN=CRK20 PE=2 SV=2
LOC_Os11g12340	3.78885	0.00254977	Up	sp|Q39214|RPM1_ARATH Disease resistance protein RPM1 OS=Arabidopsis thaliana OX=3702 GN=RPM1 PE=1 SV=1
LOC_Os06g25560	1.54643	0.00255038	Up	--
LOC_Os08g02180	1.02314	0.00255656	Up	--
LOC_Os01g73830	-1.20116	0.00256608	Down	--
LOC_Os09g34990	2.63883	0.00257053	Up	sp|B9FMX4|SPXM4_ORYSJ SPX domain-containing membrane protein Os09g0521800 OS=Oryza sativa subsp. japonica OX=39947 GN=Os09g0521800 PE=3 SV=2
LOC_Os05g10680	-5.26427	0.00261134	Down	--
LOC_Os04g32890	-1.64482	0.00263801	Down	sp|Q9M2U3|ALPL_ARATH Protein ALP1-like OS=Arabidopsis thaliana OX=3702 GN=At3g55350 PE=2 SV=1
LOC_Os09g29390	2.47033	0.00268443	Up	sp|Q41001|BCP_PEA Blue copper protein OS=Pisum sativum OX=3888 PE=2 SV=1
LOC_Os05g01890	-1.57308	0.00271462	Down	--
LOC_Os03g13640	1.12401	0.00271635	Up	--
LOC_Os02g28334	-1.21349	0.00274903	Down	NA
LOC_Os10g26840	4.30669	0.0027928	Up	sp|P08770|TRA1_MAIZE Putative AC transposase OS=Zea mays OX=4577 PE=2 SV=2
LOC_Os02g51580	5.30316	0.00287567	Up	--
LOC_Os02g46940	-1.03021	0.00292793	Down	sp|Q9C616|KAN2_ARATH Probable transcription factor KAN2 OS=Arabidopsis thaliana OX=3702 GN=KAN2 PE=2 SV=1
LOC_Os03g39870	2.41101	0.00296083	Up	--
LOC_Os01g12460	-1.57812	0.00296559	Down	sp|Q9FK13|PDV1_ARATH Plastid division protein PDV1 OS=Arabidopsis thaliana OX=3702 GN=PDV1 PE=1 SV=1
LOC_Os01g28450	3.38073	0.00300195	Up	sp|Q05968|PR1_HORVU Pathogenesis-related protein 1 OS=Hordeum vulgare OX=4513 PE=2 SV=1
LOC_Os06g20960	5.34876	0.00300318	Up	sp|Q9SPV4|SAMT_CLABR Salicylate carboxymethyltransferase OS=Clarkia breweri OX=36903 GN=SAMT PE=1 SV=1
LOC_Os01g18840	1.32219	0.00301304	Up	sp|F4K1B4|NEAP2_ARATH Nuclear envelope-associated protein 2 OS=Arabidopsis thaliana OX=3702 GN=NEAP2 PE=1 SV=1
LOC_Os03g39930	1.40836	0.00303775	Up	--
LOC_Os03g59380	1.74847	0.00306345	Up	sp|A2ZAS9|NLTP3_ORYSI Non-specific lipid-transfer protein 3 OS=Oryza sativa subsp. indica OX=39946 GN=LTP110-A PE=2 SV=1
LOC_Os11g13980	-1.83673	0.00306787	Down	sp|Q53M11|HS219_ORYSJ 21.9 kDa heat shock protein OS=Oryza sativa subsp. japonica OX=39947 GN=HSP21.9 PE=2 SV=1
LOC_Os06g37830	1.0191	0.00307832	Up	sp|Q9M2U3|ALPL_ARATH Protein ALP1-like OS=Arabidopsis thaliana OX=3702 GN=At3g55350 PE=2 SV=1
LOC_Os12g11610	5.35244	0.00308977	Up	--
LOC_Os11g13870	1.54521	0.00312041	Up	sp|Q9T0F7|GXM2_ARATH Glucuronoxylan 4-O-methyltransferase 2 OS=Arabidopsis thaliana OX=3702 GN=GXM2 PE=1 SV=1
LOC_Os06g31930	-3.62657	0.00312657	Down	sp|P09617|THN5_HORVU Leaf-specific thionin OS=Hordeum vulgare OX=4513 GN=THI1.5 PE=2 SV=2
LOC_Os10g30380	3.36072	0.00314787	Up	sp|Q6YV88|C71Z7_ORYSJ Ent-cassadiene hydroxylase OS=Oryza sativa subsp. japonica OX=39947 GN=CYP71Z7 PE=1 SV=1
LOC_Os02g36450	1.71135	0.00321758	Up	sp|Q0JCR9|MST1_ORYSJ Sugar transport protein MST1 OS=Oryza sativa subsp. japonica OX=39947 GN=MST1 PE=2 SV=1
LOC_Os12g17700	2.96296	0.00322213	Up	--
LOC_Os05g05570	1.10756	0.00323817	Up	--
LOC_Os01g66640	2.56534	0.00325459	Up	sp|O64477|Y2913_ARATH G-type lectin S-receptor-like serine/threonine-protein kinase At2g19130 OS=Arabidopsis thaliana OX=3702 GN=At2g19130 PE=2 SV=1
LOC_Os12g07640	1.01426	0.00330775	Up	sp|P81393|MYB08_ANTMA Myb-related protein 308 OS=Antirrhinum majus OX=4151 GN=MYB308 PE=2 SV=1
LOC_Os02g53130	2.82116	0.00333147	Up	sp|P27968|NIA7_HORVU Nitrate reductase [NAD(P)H] OS=Hordeum vulgare OX=4513 GN=NAR-7 PE=2 SV=1
LOC_Os02g32210	-1.38208	0.0033767	Down	--
LOC_Os04g47740	1.37306	0.00342235	Up	sp|P31843|RRPO_OENBE RNA-directed DNA polymerase homolog OS=Oenothera berteroana OX=3950 PE=4 SV=1
LOC_Os06g04090	3.45116	0.00345553	Up	sp|Q84WP6|NAC43_ARATH NAC domain-containing protein 43 OS=Arabidopsis thaliana OX=3702 GN=NAC043 PE=2 SV=2
LOC_Os12g33870	5.26228	0.003456	Up	--
LOC_Os02g40120	1.40516	0.00347813	Up	--
LOC_Os11g37860	1.29081	0.0035227	Up	sp|Q2R8L1|RGA5S_ORYSJ Disease resistance protein RGA5 OS=Oryza sativa subsp. japonica OX=39947 GN=RGA5 PE=2 SV=1
LOC_Os10g31910	1.01054	0.00356377	Up	sp|Q9SCP2|PLY12_ARATH Probable pectate lyase 12 OS=Arabidopsis thaliana OX=3702 GN=At3g53190 PE=2 SV=2
LOC_Os05g45680	2.51376	0.00358755	Up	sp|P0C2F6|RNHX1_ARATH Putative ribonuclease H protein At1g65750 OS=Arabidopsis thaliana OX=3702 GN=At1g65750 PE=3 SV=1
LOC_Os01g72270	-2.61456	0.00359531	Down	sp|P98188|C94A2_VICSA Cytochrome P450 94A2 OS=Vicia sativa OX=3908 GN=CYP94A2 PE=2 SV=1
LOC_Os02g05910	2.0151	0.0035985	Up	sp|Q9C7S5|PSYR1_ARATH Tyrosine-sulfated glycopeptide receptor 1 OS=Arabidopsis thaliana OX=3702 GN=PSY1R PE=1 SV=1
LOC_Os07g35710	1.72096	0.0035985	Up	sp|Q9SZL8|FRS5_ARATH Protein FAR1-RELATED SEQUENCE 5 OS=Arabidopsis thaliana OX=3702 GN=FRS5 PE=1 SV=1
LOC_Os12g42220	2.64829	0.00360555	Up	--
LOC_Os12g24330	4.24575	0.00361916	Up	--
LOC_Os08g43590	5.31027	0.00364961	Up	--
LOC_Os02g10830	2.56649	0.00365032	Up	sp|Q8W0E4|SAT1_ORYSJ Probable serine acetyltransferase 1 OS=Oryza sativa subsp. japonica OX=39947 GN=SAT1 PE=2 SV=1
LOC_Os10g02620	3.07446	0.00369404	Up	sp|Q7XH85|BBRC_ORYSJ Barley B recombinant-like protein C OS=Oryza sativa subsp. japonica OX=39947 GN=Os10g0115500 PE=2 SV=2
LOC_Os07g03840	1.13208	0.00369549	Up	sp|Q7XUN6|SIT2_ORYSJ L-type lectin-domain containing receptor kinase SIT2 OS=Oryza sativa subsp. japonica OX=39947 GN=SIT2 PE=2 SV=2
LOC_Os01g02760	1.11862	0.00370879	Up	sp|P93604|LRK10_WHEAT Rust resistance kinase Lr10 OS=Triticum aestivum OX=4565 GN=LRK10 PE=2 SV=1
LOC_Os04g02640	3.32557	0.00373494	Up	sp|Q9XF43|KCS6_ARATH 3-ketoacyl-CoA synthase 6 OS=Arabidopsis thaliana OX=3702 GN=CUT1 PE=1 SV=1
LOC_Os09g28650	1.28767	0.00380726	Up	sp|R4X244|TCAB1_TULGE Tuliposide A-converting enzyme b1, amyloplastic OS=Tulipa gesneriana OX=13306 GN=TCEA-B1 PE=1 SV=1
LOC_Os01g02370	4.21167	0.00381448	Up	sp|P0C5E2|LRL12_ARATH LEAF RUST 10 DISEASE-RESISTANCE LOCUS RECEPTOR-LIKE PROTEIN KINASE-like 1.2 OS=Arabidopsis thaliana OX=3702 GN=LRK10L-1.2 PE=2 SV=3
LOC_Os02g06320	1.81832	0.00386161	Up	sp|Q6ET49|OML7_ORYSJ Protein MEI2-like 7 OS=Oryza sativa subsp. japonica OX=39947 GN=OML7 PE=2 SV=1
LOC_Os02g35780	3.34075	0.0038645	Up	--
LOC_Os07g34870	5.22083	0.0038645	Up	sp|Q766C3|NEP1_NEPGR Aspartic proteinase nepenthesin-1 OS=Nepenthes gracilis OX=150966 GN=nep1 PE=1 SV=1
LOC_Os01g14960	1.53653	0.00386892	Up	--
LOC_Os02g40454	1.13852	0.00389214	Up	sp|A2X2K3|2ABB_ORYSI Serine/threonine protein phosphatase 2A 55 kDa regulatory subunit B beta isoform OS=Oryza sativa subsp. indica OX=39946 GN=OsI_006296 PE=2 SV=2
LOC_Os03g08490	1.01388	0.00396648	Up	sp|Q9SSA8|RA212_ARATH Ethylene-responsive transcription factor RAP2-12 OS=Arabidopsis thaliana OX=3702 GN=RAP2-12 PE=1 SV=1
LOC_Os01g40550	1.16128	0.00400368	Up	sp|D9UBX6|RTM2B_ARATH Inactive protein RESTRICTED TEV MOVEMENT 2 OS=Arabidopsis thaliana OX=3702 GN=RTM2 PE=3 SV=1
LOC_Os05g11070	4.25583	0.00408079	Up	sp|Q9LTS4|BH041_ARATH Putative transcription factor bHLH041 OS=Arabidopsis thaliana OX=3702 GN=BHLH41 PE=3 SV=1
LOC_Os02g42780	1.31484	0.00409196	Up	sp|Q6H7D2|SIT1_ORYSJ L-type lectin-domain containing receptor kinase SIT1 OS=Oryza sativa subsp. japonica OX=39947 GN=SIT1 PE=1 SV=1
LOC_Os07g12900	1.21023	0.00410567	Up	sp|Q8H384|HMA3_ORYSJ Cadmium/zinc-transporting ATPase HMA3 OS=Oryza sativa subsp. japonica OX=39947 GN=HMA3 PE=1 SV=1
LOC_Os10g34730	2.42619	0.00415706	Up	sp|Q9FMW4|GEML8_ARATH Putative GEM-like protein 8 OS=Arabidopsis thaliana OX=3702 GN=At5g23370 PE=3 SV=1
LOC_Os04g45000	1.39297	0.00421527	Up	sp|A4UHT7|SALR_PAPBR Salutaridine reductase OS=Papaver bracteatum OX=215227 GN=SALR PE=1 SV=1
LOC_Os05g46050	5.22307	0.00422189	Up	--
LOC_Os10g05490	3.45295	0.00428894	Up	sp|W8JMV1|CYT24_CATRO Cytochrome P450 76T24 OS=Catharanthus roseus OX=4058 GN=CYP76T24 PE=2 SV=1
LOC_Os03g61490	-3.27682	0.00429124	Down	--
LOC_Os02g36150	4.18042	0.00429145	Up	sp|A3A871|C71Z6_ORYSJ Ent-isokaurene C2/C3-hydroxylase OS=Oryza sativa subsp. japonica OX=39947 GN=CYP71Z6 PE=1 SV=1
LOC_Os03g55410	1.14605	0.00431712	Up	sp|Q9SZE7|PER51_ARATH Peroxidase 51 OS=Arabidopsis thaliana OX=3702 GN=PER51 PE=2 SV=1
LOC_Os08g19694	2.47883	0.00431953	Up	sp|Q9STE5|R13L2_ARATH Putative disease resistance RPP13-like protein 2 OS=Arabidopsis thaliana OX=3702 GN=RPP13L2 PE=3 SV=1
LOC_Os03g06470	-3.19826	0.00438957	Down	--
LOC_Os11g16550	1.06285	0.00440852	Up	sp|Q9LX31|GUN4C_ARATH Tetrapyrrole-binding protein, chloroplastic OS=Arabidopsis thaliana OX=3702 GN=GUN4 PE=1 SV=1
LOC_Os08g16050	1.52932	0.0044562	Up	sp|Q8S8Q6|TET8_ARATH Tetraspanin-8 OS=Arabidopsis thaliana OX=3702 GN=TET8 PE=2 SV=1
LOC_Os04g43400	2.10116	0.00445879	Up	sp|Q7XSK1|BGL17_ORYSJ Putative beta-glucosidase 17 OS=Oryza sativa subsp. japonica OX=39947 GN=BGLU17 PE=5 SV=3
LOC_Os04g45890	-1.07509	0.00449821	Down	--
LOC_Os03g61290	-1.82213	0.00450696	Down	sp|Q9LUN4|CHX19_ARATH Cation/H(+) antiporter 19 OS=Arabidopsis thaliana OX=3702 GN=CHX19 PE=2 SV=1
LOC_Os12g02980	1.57134	0.00452981	Up	sp|Q2QYE1|APY3_ORYSJ Probable apyrase 3 OS=Oryza sativa subsp. japonica OX=39947 GN=APY3 PE=2 SV=2
LOC_Os01g34920	-5.07978	0.00456766	Down	sp|Q8RUV9|BGAL1_ORYSJ Beta-galactosidase 1 OS=Oryza sativa subsp. japonica OX=39947 GN=Os01g0533400 PE=2 SV=1
LOC_Os02g17940	1.02793	0.00456825	Up	sp|Q39224|SRG1_ARATH Protein SRG1 OS=Arabidopsis thaliana OX=3702 GN=SRG1 PE=2 SV=1
LOC_Os08g29980	-3.31283	0.00458883	Down	sp|P10978|POLX_TOBAC Retrovirus-related Pol polyprotein from transposon TNT 1-94 OS=Nicotiana tabacum OX=4097 PE=2 SV=1
LOC_Os11g29740	3.36686	0.00459133	Up	--
LOC_Os06g45950	-1.17514	0.00463699	Down	sp|Q9LTV3|SAU72_ARATH Auxin-responsive protein SAUR72 OS=Arabidopsis thaliana OX=3702 GN=SAUR72 PE=2 SV=1
LOC_Os05g51240	2.65874	0.00466727	Up	sp|Q9SZU7|KAI2_ARATH Probable esterase KAI2 OS=Arabidopsis thaliana OX=3702 GN=KAI2 PE=1 SV=1
LOC_Os04g44250	-1.06888	0.00472061	Down	sp|Q9ZQ95|U73C6_ARATH UDP-glycosyltransferase 73C6 OS=Arabidopsis thaliana OX=3702 GN=UGT73C6 PE=2 SV=1
LOC_Os07g39060	-1.23487	0.00481431	Down	--
LOC_Os03g38920	5.1958	0.0048456	Up	sp|Q6L5H6|P2C50_ORYSJ Protein phosphatase 2C 50 OS=Oryza sativa subsp. japonica OX=39947 GN=PP2C50 PE=1 SV=1
LOC_Os01g06150	-5.15564	0.0048699	Down	--
LOC_Os03g21570	5.18181	0.0048721	Up	sp|B9DFV2|PQT3L_ARATH E3 ubiquitin ligase PQT3-like OS=Arabidopsis thaliana OX=3702 GN=At5g47430 PE=1 SV=1
LOC_Os01g62030	5.27753	0.00492692	Up	sp|Q9LQQ0|DIR25_ARATH Dirigent protein 25 OS=Arabidopsis thaliana OX=3702 GN=DIR25 PE=3 SV=1
LOC_Os06g37550	2.04134	0.00496396	Up	--
LOC_Os11g27250	-1.38572	0.00498114	Down	sp|Q9FIF7|PP435_ARATH Putative pentatricopeptide repeat-containing protein At5g59200, chloroplastic OS=Arabidopsis thaliana OX=3702 GN=PCMP-E41 PE=3 SV=1
LOC_Os12g12130	3.09067	0.00499636	Up	sp|Q9SVM3|RLP49_ARATH Receptor-like protein 49 OS=Arabidopsis thaliana OX=3702 GN=RLP49 PE=2 SV=2
LOC_Os01g62130	1.22517	0.00503718	Up	sp|Q681X4|ZAT5_ARATH Zinc finger protein ZAT5 OS=Arabidopsis thaliana OX=3702 GN=ZAT5 PE=2 SV=1
LOC_Os12g02160	2.93177	0.00503892	Up	--
LOC_Os04g42740	4.28724	0.00508072	Up	sp|O64477|Y2913_ARATH G-type lectin S-receptor-like serine/threonine-protein kinase At2g19130 OS=Arabidopsis thaliana OX=3702 GN=At2g19130 PE=2 SV=1
LOC_Os02g52380	-3.20049	0.00510827	Down	--
LOC_Os05g18540	4.09746	0.00518004	Up	sp|Q8RWS4|BYST_ARATH Bystin OS=Arabidopsis thaliana OX=3702 GN=ENP1 PE=1 SV=1
LOC_Os10g02910	1.36311	0.0052724	Up	sp|Q6AVI0|RSLE2_ORYSJ Zinc finger BED domain-containing protein RICESLEEPER 2 OS=Oryza sativa subsp. japonica OX=39947 GN=Os03g0733400 PE=2 SV=1
LOC_Os04g32850	1.1088	0.00527317	Up	sp|Q7XL73|PI21_ORYSJ Protein PYRICULARIA ORYZAE RESISTANCE 21 OS=Oryza sativa subsp. japonica OX=39947 GN=PI21 PE=2 SV=1
LOC_Os11g12420	2.23762	0.00528575	Up	sp|Q53Q32|SPZ6B_ORYSJ Serpin-Z6B OS=Oryza sativa subsp. japonica OX=39947 GN=Os11g0230700 PE=3 SV=2
LOC_Os07g03930	2.90106	0.00530631	Up	sp|Q7XUN6|SIT2_ORYSJ L-type lectin-domain containing receptor kinase SIT2 OS=Oryza sativa subsp. japonica OX=39947 GN=SIT2 PE=2 SV=2
LOC_Os10g19960	1.43754	0.00531009	Up	sp|Q7XFK2|BGA14_ORYSJ Beta-galactosidase 14 OS=Oryza sativa subsp. japonica OX=39947 GN=Os10g0340600 PE=2 SV=1
LOC_Os03g63880	4.17058	0.00535873	Up	--
LOC_Os01g51360	1.75279	0.00544644	Up	sp|Q5NAI4|PLA5_ORYSJ Phospholipase A1-II 5 OS=Oryza sativa subsp. japonica OX=39947 GN=Os01g0710700 PE=2 SV=1
LOC_Os01g25720	1.06687	0.00545204	Up	sp|Q7XA40|RGA3_SOLBU Putative disease resistance protein RGA3 OS=Solanum bulbocastanum OX=147425 GN=RGA3 PE=2 SV=2
LOC_Os02g45460	1.5966	0.00555526	Up	--
LOC_Os03g15660	1.46889	0.00555876	Up	sp|Q9SFE4|ERF12_ARATH Ethylene-responsive transcription factor ERF012 OS=Arabidopsis thaliana OX=3702 GN=ERF012 PE=2 SV=1
LOC_Os10g14040	-1.19159	0.00558396	Down	sp|A2Y9M4|SSY1_ORYSI Soluble starch synthase 1, chloroplastic/amyloplastic OS=Oryza sativa subsp. indica OX=39946 GN=OsI_021017 PE=2 SV=1
LOC_Os03g38170	-1.0098	0.00558396	Down	sp|Q9LHE9|MYO1_ARATH Myosin-1 OS=Arabidopsis thaliana OX=3702 GN=VIII-1 PE=1 SV=1
LOC_Os01g44120	-1.52811	0.00565873	Down	--
LOC_Os04g23550	-3.18048	0.00568562	Down	sp|Q2HIV9|BH035_ARATH Transcription factor bHLH35 OS=Arabidopsis thaliana OX=3702 GN=BHLH35 PE=2 SV=1
LOC_Os08g41960	1.67577	0.0056987	Up	sp|Q9XJ61|MAD51_ORYSJ MADS-box transcription factor 51 OS=Oryza sativa subsp. japonica OX=39947 GN=MADS51 PE=2 SV=1
LOC_Os01g48020	2.38851	0.00572026	Up	sp|P17801|KPRO_MAIZE Putative receptor protein kinase ZmPK1 OS=Zea mays OX=4577 GN=PK1 PE=2 SV=2
LOC_Os02g10850	2.18804	0.00573715	Up	sp|Q93W93|FBK22_ARATH F-box/kelch-repeat protein At1g55270 OS=Arabidopsis thaliana OX=3702 GN=At1g55270 PE=2 SV=1
LOC_Os01g72150	1.51372	0.00574146	Up	sp|Q03662|GSTX1_TOBAC Probable glutathione S-transferase OS=Nicotiana tabacum OX=4097 PE=2 SV=1
LOC_Os05g48000	-2.16222	0.00574218	Down	--
LOC_Os02g05520	1.91316	0.0057643	Up	sp|Q1PE49|4ON1_ARATH Protein At-4/1 OS=Arabidopsis thaliana OX=3702 GN=At4g26020 PE=1 SV=1
LOC_Os10g42130	1.52741	0.00578357	Up	sp|O49697|NAC71_ARATH NAC domain-containing protein 71 OS=Arabidopsis thaliana OX=3702 GN=NAC071 PE=2 SV=1
LOC_Os03g59570	3.27242	0.00579431	Up	sp|Q94ID2|IPT5_ARATH Adenylate isopentenyltransferase 5, chloroplastic OS=Arabidopsis thaliana OX=3702 GN=IPT5 PE=1 SV=2
LOC_Os04g34190	1.00213	0.0060175	Up	sp|P31843|RRPO_OENBE RNA-directed DNA polymerase homolog OS=Oenothera berteroana OX=3950 PE=4 SV=1
LOC_Os06g16450	2.6674	0.00609135	Up	sp|P0DO07|PIK2_ORYSJ Disease resistance protein Pik-2 OS=Oryza sativa subsp. japonica OX=39947 GN=PIK-2 PE=3 SV=1
LOC_Os02g54060	1.20686	0.00614444	Up	sp|O65282|CH20_ARATH 20 kDa chaperonin, chloroplastic OS=Arabidopsis thaliana OX=3702 GN=CPN20 PE=1 SV=2
LOC_Os05g48300	-1.43217	0.00622898	Down	sp|Q9SY29|PUP4_ARATH Probable purine permease 4 OS=Arabidopsis thaliana OX=3702 GN=PUP4 PE=2 SV=1
LOC_Os06g16470	3.55007	0.00625481	Up	--
LOC_Os12g23400	5.1015	0.00630314	Up	--
LOC_Os09g06920	5.07959	0.0063274	Up	--
LOC_Os01g53090	1.08843	0.00637087	Up	sp|P16273|PRPX_HORVU Pathogen-related protein OS=Hordeum vulgare OX=4513 PE=2 SV=2
LOC_Os04g08550	1.02418	0.00638174	Up	sp|B4F9A4|DMAS1_MAIZE Deoxymugineic acid synthase 1 OS=Zea mays OX=4577 GN=DMAS1 PE=1 SV=1
LOC_Os02g41904	-1.56299	0.00639236	Down	sp|Q6K209|CAL1_ORYSJ Defensin-like protein CAL1 OS=Oryza sativa subsp. japonica OX=39947 GN=CAL1 PE=1 SV=1
LOC_Os04g59190	1.4241	0.00641699	Up	sp|P84516|PER1_SORBI Cationic peroxidase SPC4 OS=Sorghum bicolor OX=4558 GN=Sb03g046810 PE=1 SV=2
LOC_Os05g39580	-1.11875	0.00645924	Down	sp|O80920|PYL4_ARATH Abscisic acid receptor PYL4 OS=Arabidopsis thaliana OX=3702 GN=PYL4 PE=1 SV=1
LOC_Os07g03860	4.19541	0.00647111	Up	sp|Q7XUN6|SIT2_ORYSJ L-type lectin-domain containing receptor kinase SIT2 OS=Oryza sativa subsp. japonica OX=39947 GN=SIT2 PE=2 SV=2
LOC_Os04g29500	5.2263	0.00648046	Up	--
LOC_Os10g06730	1.89176	0.00653072	Up	--
LOC_Os02g36500	-1.11047	0.00657049	Down	--
LOC_Os03g64330	-1.85038	0.00664928	Down	sp|Q7Y1E6|PIP28_ORYSJ Probable aquaporin PIP2-8 OS=Oryza sativa subsp. japonica OX=39947 GN=PIP2-8 PE=2 SV=1
LOC_Os04g41750	1.07506	0.00667775	Up	--
LOC_Os02g13420	1.47859	0.00670147	Up	sp|Q9SGP2|HSL1_ARATH Receptor-like protein kinase HSL1 OS=Arabidopsis thaliana OX=3702 GN=HSL1 PE=2 SV=1
LOC_Os10g24004	3.21065	0.00674193	Up	--
LOC_Os01g52320	5.055	0.00675043	Up	sp|Q7XA40|RGA3_SOLBU Putative disease resistance protein RGA3 OS=Solanum bulbocastanum OX=147425 GN=RGA3 PE=2 SV=2
LOC_Os08g37850	1.81925	0.00680082	Up	--
LOC_Os06g14050	1.76657	0.00682514	Up	sp|Q8L612|MACP1_ARATH MACPF domain-containing protein At1g14780 OS=Arabidopsis thaliana OX=3702 GN=At1g14780 PE=2 SV=1
LOC_Os06g17410	1.69154	0.00684362	Up	sp|Q6Z345|DOF4_ORYSJ Dof zinc finger protein 4 OS=Oryza sativa subsp. japonica OX=39947 GN=DOF4 PE=2 SV=1
LOC_Os05g27510	-4.96872	0.00686265	Down	--
LOC_Os02g24730	-3.122	0.0069052	Down	sp|P0C2F6|RNHX1_ARATH Putative ribonuclease H protein At1g65750 OS=Arabidopsis thaliana OX=3702 GN=At1g65750 PE=3 SV=1
LOC_Os06g36320	1.35432	0.00694255	Up	sp|C0LGX3|HSL2_ARATH LRR receptor-like serine/threonine-protein kinase HSL2 OS=Arabidopsis thaliana OX=3702 GN=HSL2 PE=1 SV=1
LOC_Os02g11770	-4.96244	0.00696852	Down	--
LOC_Os03g52650	-1.53992	0.00700935	Down	sp|Q42374|SY111_ARATH Syntaxin-related protein KNOLLE OS=Arabidopsis thaliana OX=3702 GN=KN PE=1 SV=1
LOC_Os04g57830	-1.17479	0.00701732	Down	--
LOC_Os08g11265	1.57665	0.00702708	Up	--
LOC_Os02g07654	5.05758	0.0070695	Up	--
LOC_Os01g65060	2.35033	0.00711353	Up	sp|O64477|Y2913_ARATH G-type lectin S-receptor-like serine/threonine-protein kinase At2g19130 OS=Arabidopsis thaliana OX=3702 GN=At2g19130 PE=2 SV=1
LOC_Os12g08240	1.06811	0.00711808	Up	--
LOC_Os08g27170	1.17884	0.00712644	Up	sp|Q9C9T2|SARD1_ARATH Protein SAR DEFICIENT 1 OS=Arabidopsis thaliana OX=3702 GN=SARD1 PE=1 SV=1
LOC_Os02g45680	2.69558	0.0071375	Up	sp|P10978|POLX_TOBAC Retrovirus-related Pol polyprotein from transposon TNT 1-94 OS=Nicotiana tabacum OX=4097 PE=2 SV=1
LOC_Os10g36300	2.79311	0.00717908	Up	--
LOC_Os02g35970	-1.10461	0.00717908	Down	sp|Q5KS50|NPH3_ORYSJ Coleoptile phototropism protein 1 OS=Oryza sativa subsp. japonica OX=39947 GN=CPT1 PE=2 SV=1
LOC_Os11g47600	1.00744	0.00722207	Up	sp|Q7GCM7|XIP1_ORYSJ Xylanase inhibitor protein 1 OS=Oryza sativa subsp. japonica OX=39947 GN=RIXI PE=1 SV=1
LOC_Os10g32070	1.06119	0.00725857	Up	sp|Q8LAU9|GATA1_ARATH GATA transcription factor 1 OS=Arabidopsis thaliana OX=3702 GN=GATA1 PE=2 SV=2
LOC_Os02g09580	1.78916	0.0072871	Up	sp|Q9ZV93|FDL10_ARATH F-box/FBD/LRR-repeat protein At1g78750 OS=Arabidopsis thaliana OX=3702 GN=At1g78750 PE=2 SV=1
LOC_Os06g38920	-2.52466	0.00730891	Down	sp|Q9FFJ8|LIMYB_ARATH L10-interacting MYB domain-containing protein OS=Arabidopsis thaliana OX=3702 GN=LIMYB PE=1 SV=1
LOC_Os02g02560	1.37619	0.00737028	Up	sp|Q9SDX3|UGPA_MUSAC UTP--glucose-1-phosphate uridylyltransferase OS=Musa acuminata OX=4641 GN=UGPA PE=2 SV=1
LOC_Os12g41750	4.03185	0.00737764	Up	--
LOC_Os07g11790	5.08243	0.00739281	Up	sp|Q5GJ59|TPS7_MAIZE Tau-cadinol synthase OS=Zea mays OX=4577 GN=TPS7 PE=1 SV=1
LOC_Os07g25990	3.2624	0.00747808	Up	--
LOC_Os10g13390	5.07458	0.00754012	Up	--
LOC_Os03g43540	-1.06927	0.0076033	Down	--
LOC_Os02g13830	1.69331	0.0077211	Up	sp|Q8VWH2|RFT1_ORYSJ Protein RICE FLOWERING LOCUS T 1 OS=Oryza sativa subsp. japonica OX=39947 GN=RFT1 PE=1 SV=1
LOC_Os04g16745	2.66526	0.00773921	Up	sp|Q6ENH6|RR14_ORYNI 30S ribosomal protein S14, chloroplastic OS=Oryza nivara OX=4536 GN=rps14 PE=3 SV=1
LOC_Os07g33550	-1.2545	0.00775311	Down	sp|Q50EK1|C16B1_PICSI Cytochrome P450 716B1 OS=Picea sitchensis OX=3332 GN=CYP716B1 PE=2 SV=1
LOC_Os12g03070	1.8255	0.0077899	Up	sp|P93236|ABA2_SOLLC Zeaxanthin epoxidase, chloroplastic OS=Solanum lycopersicum OX=4081 PE=2 SV=1
LOC_Os05g41420	2.12679	0.00779052	Up	sp|Q9FL41|WTR38_ARATH WAT1-related protein At5g07050 OS=Arabidopsis thaliana OX=3702 GN=At5g07050 PE=2 SV=1
LOC_Os11g31300	4.02473	0.00780625	Up	--
LOC_Os04g09380	-4.98032	0.00780625	Down	sp|P10978|POLX_TOBAC Retrovirus-related Pol polyprotein from transposon TNT 1-94 OS=Nicotiana tabacum OX=4097 PE=2 SV=1
LOC_Os05g24900	1.3111	0.00781051	Up	--
LOC_Os11g10500	-4.93543	0.00786081	Down	sp|P10978|POLX_TOBAC Retrovirus-related Pol polyprotein from transposon TNT 1-94 OS=Nicotiana tabacum OX=4097 PE=2 SV=1
LOC_Os01g06080	-1.3028	0.00789914	Down	--
LOC_Os10g21310	3.20948	0.00801301	Up	sp|Q6ENE8|PSBB_ORYNI Photosystem II CP47 reaction center protein OS=Oryza nivara OX=4536 GN=psbB PE=3 SV=1
LOC_Os09g11390	4.00107	0.00803953	Up	sp|Q9SZL8|FRS5_ARATH Protein FAR1-RELATED SEQUENCE 5 OS=Arabidopsis thaliana OX=3702 GN=FRS5 PE=1 SV=1
LOC_Os02g06970	1.84749	0.00807679	Up	--
LOC_Os07g39240	3.17361	0.00819953	Up	--
LOC_Os05g05620	2.18065	0.0082582	Up	sp|O65857|GSTF1_ORYSJ Probable glutathione S-transferase GSTF1 OS=Oryza sativa subsp. japonica OX=39947 GN=GSTF1 PE=1 SV=2
LOC_Os05g32750	2.23921	0.00830159	Up	--
LOC_Os05g22910	2.5893	0.00832454	Up	--
LOC_Os08g42800	-1.36453	0.00832454	Down	--
LOC_Os08g41760	5.06012	0.00845192	Up	sp|Q9LMR4|FBK4_ARATH Putative F-box/kelch-repeat protein At1g15680 OS=Arabidopsis thaliana OX=3702 GN=At1g15680 PE=4 SV=1
LOC_Os02g37770	1.99091	0.00846042	Up	sp|Q10PI6|LCAT1_ORYSJ Lecithin-cholesterol acyltransferase-like 1 OS=Oryza sativa subsp. japonica OX=39947 GN=Os03g0232800 PE=2 SV=1
LOC_Os08g14760	5.02953	0.00847222	Up	sp|P17814|4CL1_ORYSJ Probable 4-coumarate--CoA ligase 1 OS=Oryza sativa subsp. japonica OX=39947 GN=4CL1 PE=2 SV=2
LOC_Os02g22160	1.245	0.00853168	Up	sp|Q65XS5|BC10_ORYSJ Glycosyltransferase BC10 OS=Oryza sativa subsp. japonica OX=39947 GN=BC10 PE=1 SV=1
LOC_Os05g04570	1.65743	0.00866263	Up	sp|O65451|FB333_ARATH Probable F-box protein At4g22030 OS=Arabidopsis thaliana OX=3702 GN=At4g22030 PE=4 SV=1
LOC_Os01g01940	1.25057	0.00869599	Up	--
LOC_Os11g44260	1.65802	0.00870734	Up	sp|Q9LY50|ACCR3_ARATH Putative serine/threonine-protein kinase-like protein CCR3 OS=Arabidopsis thaliana OX=3702 GN=CCR3 PE=2 SV=1
LOC_Os05g37210	-3.86291	0.00891396	Down	--
LOC_Os03g11370	1.36919	0.0089365	Up	sp|Q10Q26|Y3123_ORYSJ B3 domain-containing protein Os03g0212300 OS=Oryza sativa subsp. japonica OX=39947 GN=Os03g0212300 PE=2 SV=1
LOC_Os03g11770	-1.46024	0.00896118	Down	--
LOC_Os02g50450	4.96432	0.00907598	Up	--
LOC_Os09g24310	1.21658	0.00911703	Up	sp|Q500V5|AGDP1_ARATH Protein AGENET DOMAIN (AGD)-CONTAINING P1 OS=Arabidopsis thaliana OX=3702 GN=AGDP1 PE=1 SV=1
LOC_Os09g15660	-1.24313	0.00917098	Down	--
LOC_Os11g44990	1.41168	0.00919323	Up	sp|Q7XA39|RGA4_SOLBU Putative disease resistance protein RGA4 OS=Solanum bulbocastanum OX=147425 GN=RGA4 PE=2 SV=1
LOC_Os04g50176	1.21759	0.00924726	Up	--
LOC_Os08g20200	2.77902	0.00930133	Up	sp|Q39152|FACR1_ARATH Fatty acyl-CoA reductase 1 OS=Arabidopsis thaliana OX=3702 GN=FAR1 PE=1 SV=1
LOC_Os03g50530	1.02373	0.00933266	Up	--
LOC_Os11g12470	1.71781	0.00939098	Up	--
LOC_Os09g19390	5.02599	0.00943479	Up	sp|Q9FZB1|Y5188_ARATH Probable LRR receptor-like serine/threonine-protein kinase At1g51880 OS=Arabidopsis thaliana OX=3702 GN=At1g51880 PE=2 SV=1
LOC_Os02g06950	-2.49588	0.0095585	Down	sp|Q84TE6|NAC22_ARATH NAC domain-containing protein 21/22 OS=Arabidopsis thaliana OX=3702 GN=NAC021 PE=1 SV=2
LOC_Os02g42430	2.09157	0.00958819	Up	sp|Q9FTA0|GEML4_ARATH GEM-like protein 4 OS=Arabidopsis thaliana OX=3702 GN=At5g08350 PE=2 SV=1
LOC_Os03g17040	2.9069	0.00964598	Up	--
LOC_Os05g07450	-1.31358	0.00965644	Down	sp|O64477|Y2913_ARATH G-type lectin S-receptor-like serine/threonine-protein kinase At2g19130 OS=Arabidopsis thaliana OX=3702 GN=At2g19130 PE=2 SV=1
LOC_Os11g37940	1.54524	0.00971857	Up	sp|P28814|BARW_HORVU Barwin OS=Hordeum vulgare OX=4513 PE=1 SV=1
LOC_Os11g44680	1.46038	0.00974651	Up	sp|Q9FKL6|CB60B_ARATH Calmodulin-binding protein 60 B OS=Arabidopsis thaliana OX=3702 GN=CBP60B PE=2 SV=1
LOC_Os12g41570	3.11908	0.00982283	Up	sp|Q8RY67|WAKLO_ARATH Wall-associated receptor kinase-like 14 OS=Arabidopsis thaliana OX=3702 GN=WAKL14 PE=2 SV=2
LOC_Os08g34700	1.79724	0.00985019	Up	sp|Q9FHH5|GDU3_ARATH Protein GLUTAMINE DUMPER 3 OS=Arabidopsis thaliana OX=3702 GN=GDU3 PE=2 SV=1
LOC_Os01g71820	3.15957	0.00985382	Up	sp|Q02438|E13E_HORVU Glucan endo-1,3-beta-glucosidase GV OS=Hordeum vulgare OX=4513 PE=2 SV=2
LOC_Os03g60810	3.19909	0.00993875	Up	sp|Q7XUN6|SIT2_ORYSJ L-type lectin-domain containing receptor kinase SIT2 OS=Oryza sativa subsp. japonica OX=39947 GN=SIT2 PE=2 SV=2
LOC_Os11g03270	1.1237	0.0099627	Up	sp|Q2QYE1|APY3_ORYSJ Probable apyrase 3 OS=Oryza sativa subsp. japonica OX=39947 GN=APY3 PE=2 SV=2
LOC_Os06g31050	1.96107	0.0099943	Up	--
LOC_Os05g32980	-1.14501	0.0100078	Down	--
LOC_Os11g02750	1.51133	0.0100711	Up	sp|Q9ZVI6|LOR8_ARATH Protein LURP-one-related 8 OS=Arabidopsis thaliana OX=3702 GN=At2g38640 PE=2 SV=1
LOC_Os12g02720	1.31525	0.0100774	Up	sp|Q9ZVI6|LOR8_ARATH Protein LURP-one-related 8 OS=Arabidopsis thaliana OX=3702 GN=At2g38640 PE=2 SV=1
LOC_Os06g20750	-3.85914	0.0100991	Down	sp|Q9SSQ4|FRS6_ARATH Protein FAR1-RELATED SEQUENCE 6 OS=Arabidopsis thaliana OX=3702 GN=FRS6 PE=2 SV=1
LOC_Os05g16250	-4.83927	0.0101519	Down	--
LOC_Os07g46030	1.44759	0.0102221	Up	--
LOC_Os04g47780	1.05738	0.0102265	Up	sp|Q9SVG0|AVT3C_ARATH Amino acid transporter AVT3C OS=Arabidopsis thaliana OX=3702 GN=AVT3C PE=1 SV=1
LOC_Os02g56920	-1.09763	0.0102437	Down	sp|Q6K3D8|GLO16_ORYSJ Very-long-chain aldehyde decarbonylase GL1-6 OS=Oryza sativa subsp. japonica OX=39947 GN=GL1-6 PE=2 SV=1
LOC_Os08g05970	1.19373	0.0102786	Up	--
LOC_Os09g08000	2.12708	0.0102985	Up	--
LOC_Os01g69890	1.90395	0.0103113	Up	--
LOC_Os01g26240	1.20431	0.0103226	Up	sp|P10978|POLX_TOBAC Retrovirus-related Pol polyprotein from transposon TNT 1-94 OS=Nicotiana tabacum OX=4097 PE=2 SV=1
LOC_Os02g18340	1.04269	0.010362	Up	sp|P31843|RRPO_OENBE RNA-directed DNA polymerase homolog OS=Oenothera berteroana OX=3950 PE=4 SV=1
LOC_Os04g30380	1.11874	0.0104484	Up	sp|P10978|POLX_TOBAC Retrovirus-related Pol polyprotein from transposon TNT 1-94 OS=Nicotiana tabacum OX=4097 PE=2 SV=1
LOC_Os06g12310	1.01292	0.0104501	Up	sp|Q67WJ8|NIP22_ORYSJ Aquaporin NIP2-2 OS=Oryza sativa subsp. japonica OX=39947 GN=NIP2-2 PE=1 SV=1
LOC_Os11g44250	1.24517	0.0105306	Up	sp|Q9LY50|ACCR3_ARATH Putative serine/threonine-protein kinase-like protein CCR3 OS=Arabidopsis thaliana OX=3702 GN=CCR3 PE=2 SV=1
LOC_Os02g48430	1.94501	0.0105306	Up	--
LOC_Os03g03670	1.41865	0.0105349	Up	--
LOC_Os11g47590	3.12014	0.0105666	Up	sp|Q7GCM7|XIP1_ORYSJ Xylanase inhibitor protein 1 OS=Oryza sativa subsp. japonica OX=39947 GN=RIXI PE=1 SV=1
LOC_Os11g43990	1.08978	0.0106072	Up	--
LOC_Os02g06690	3.8908	0.0107584	Up	sp|Q9SK27|ENL1_ARATH Early nodulin-like protein 1 OS=Arabidopsis thaliana OX=3702 GN=At2g25060 PE=2 SV=2
LOC_Os09g26610	-2.11007	0.0108074	Down	sp|O65695|SAU50_ARATH Auxin-responsive protein SAUR50 OS=Arabidopsis thaliana OX=3702 GN=SAUR50 PE=1 SV=1
LOC_Os08g33550	-1.12939	0.0108787	Down	--
LOC_Os10g08640	4.93874	0.0110469	Up	--
LOC_Os12g38170	3.14129	0.0110478	Up	sp|Q41350|OLP1_SOLLC Osmotin-like protein OS=Solanum lycopersicum OX=4081 PE=1 SV=1
LOC_Os01g58830	-4.80013	0.0111468	Down	sp|Q6AVI0|RSLE2_ORYSJ Zinc finger BED domain-containing protein RICESLEEPER 2 OS=Oryza sativa subsp. japonica OX=39947 GN=Os03g0733400 PE=2 SV=1
LOC_Os06g19500	-2.91012	0.0111692	Down	sp|Q8L9C4|KCR1_ARATH Very-long-chain 3-oxoacyl-CoA reductase 1 OS=Arabidopsis thaliana OX=3702 GN=KCR1 PE=1 SV=1
LOC_Os12g32640	1.70595	0.0112413	Up	sp|Q9SZG0|HHP4_ARATH Heptahelical transmembrane protein 4 OS=Arabidopsis thaliana OX=3702 GN=HHP4 PE=2 SV=1
LOC_Os11g35850	2.94631	0.0112618	Up	sp|Q6JN47|EIX1_SOLLC Receptor-like protein EIX1 OS=Solanum lycopersicum OX=4081 GN=EIX1 PE=2 SV=2
LOC_Os03g24560	1.60283	0.011284	Up	--
LOC_Os03g02330	1.16119	0.0113726	Up	sp|F4IJ77|AATP4_ARATH AAA-ATPase At2g46620 OS=Arabidopsis thaliana OX=3702 GN=At2g46620 PE=2 SV=1
LOC_Os01g03170	1.93596	0.0114863	Up	sp|Q9FKD9|SINL6_ARATH Putative E3 ubiquitin-protein ligase SINA-like 6 OS=Arabidopsis thaliana OX=3702 GN=At5g37870 PE=3 SV=1
LOC_Os02g13120	1.77201	0.0115062	Up	--
LOC_Os03g24540	1.66103	0.0117036	Up	--
LOC_Os02g49640	4.93568	0.0118067	Up	sp|Q6ID77|MED11_ARATH Mediator of RNA polymerase II transcription subunit 11 OS=Arabidopsis thaliana OX=3702 GN=MED11 PE=1 SV=1
LOC_Os04g41980	-1.26315	0.0119853	Down	--
LOC_Os05g42100	1.25943	0.0119932	Up	--
LOC_Os02g26800	-1.47791	0.0120538	Down	sp|Q9LNG5|PPP7L_ARATH Serine/threonine-protein phosphatase 7 long form homolog OS=Arabidopsis thaliana OX=3702 GN=MAIL3 PE=2 SV=1
LOC_Os11g14910	1.26828	0.0120781	Up	sp|Q39172|AER_ARATH NADPH-dependent oxidoreductase 2-alkenal reductase OS=Arabidopsis thaliana OX=3702 GN=AER PE=1 SV=1
LOC_Os11g36270	4.86904	0.0121842	Up	sp|Q94HW2|POLR1_ARATH Retrovirus-related Pol polyprotein from transposon RE1 OS=Arabidopsis thaliana OX=3702 GN=RE1 PE=2 SV=1
LOC_Os11g25560	1.14711	0.0122783	Up	sp|Q9SRT2|BH062_ARATH Transcription factor bHLH62 OS=Arabidopsis thaliana OX=3702 GN=BHLH62 PE=2 SV=1
LOC_Os01g71710	3.86997	0.0123415	Up	sp|B9EXZ6|BAT1_ORYSJ Amino-acid permease BAT1 homolog OS=Oryza sativa subsp. japonica OX=39947 GN=BAT1 PE=2 SV=1
LOC_Os07g07920	1.19713	0.0123418	Up	sp|Q9LZH5|LTPG2_ARATH Non-specific lipid transfer protein GPI-anchored 2 OS=Arabidopsis thaliana OX=3702 GN=LTPG2 PE=2 SV=1
LOC_Os08g32990	3.08823	0.012366	Up	sp|Q9FJ98|RPD6A_ARATH DNA-directed RNA polymerases II, IV and V subunit 6A OS=Arabidopsis thaliana OX=3702 GN=NRPB6A PE=1 SV=1
LOC_Os03g61720	-1.89435	0.0123846	Down	sp|Q9FZ22|GPAT2_ARATH Probable glycerol-3-phosphate acyltransferase 2 OS=Arabidopsis thaliana OX=3702 GN=GPAT2 PE=2 SV=1
LOC_Os04g50880	4.86755	0.0124229	Up	sp|P26302|KPPR_WHEAT Phosphoribulokinase, chloroplastic OS=Triticum aestivum OX=4565 PE=2 SV=1
LOC_Os12g22600	4.86755	0.0124229	Up	sp|Q9SW95|SYNC2_ARATH Asparagine--tRNA ligase, cytoplasmic 2 OS=Arabidopsis thaliana OX=3702 GN=SYNC2 PE=1 SV=2
LOC_Os05g23350	-1.27712	0.0124269	Down	sp|F4JG10|XYN3_ARATH Endo-1,4-beta-xylanase 3 OS=Arabidopsis thaliana OX=3702 GN=XYN3 PE=2 SV=1
LOC_Os02g10150	1.20365	0.0124601	Up	sp|E3VNM4|TGA10_ARATH Transcription factor TGA10 OS=Arabidopsis thaliana OX=3702 GN=TGA10 PE=1 SV=1
LOC_Os10g04720	4.9209	0.0125357	Up	sp|Q0D5R2|CRK10_ORYSJ Cysteine-rich receptor-like protein kinase 10 OS=Oryza sativa subsp. japonica OX=39947 GN=CRK10 PE=2 SV=1
LOC_Os02g34250	-4.37492	0.0125378	Down	--
LOC_Os02g16070	4.89875	0.0126873	Up	--
LOC_Os05g36900	2.66504	0.0127864	Up	sp|Q9SVC5|DOF35_ARATH Dof zinc finger protein DOF3.5 OS=Arabidopsis thaliana OX=3702 GN=DOF3.5 PE=3 SV=1
LOC_Os12g38700	4.89283	0.0128775	Up	--
LOC_Os03g15220	1.8403	0.0129284	Up	--
LOC_Os09g13470	1.27498	0.0130098	Up	sp|Q9SD53|Y3720_ARATH UPF0481 protein At3g47200 OS=Arabidopsis thaliana OX=3702 GN=At3g47200 PE=2 SV=1
LOC_Os06g19970	1.26095	0.0130304	Up	--
LOC_Os07g32100	1.47719	0.0131033	Up	sp|O65278|ULP1B_ARATH Putative ubiquitin-like-specific protease 1B OS=Arabidopsis thaliana OX=3702 GN=ULP1B PE=5 SV=2
LOC_Os05g49850	-4.8599	0.0132385	Down	sp|Q94HW2|POLR1_ARATH Retrovirus-related Pol polyprotein from transposon RE1 OS=Arabidopsis thaliana OX=3702 GN=RE1 PE=2 SV=1
LOC_Os04g13140	1.67441	0.0132529	Up	sp|A2XQE8|SAG39_ORYSI Senescence-specific cysteine protease SAG39 OS=Oryza sativa subsp. indica OX=39946 GN=OsI_14861 PE=3 SV=1
LOC_Os10g19000	1.72281	0.0134702	Up	--
LOC_Os02g39330	1.57459	0.0135085	Up	sp|Q6K8R2|CHI6_ORYSJ Chitinase 6 OS=Oryza sativa subsp. japonica OX=39947 GN=Cht6 PE=2 SV=1
LOC_Os05g11210	-2.97026	0.0135918	Down	sp|P59082|LFS_ALLCE Lachrymatory-factor synthase OS=Allium cepa OX=4679 GN=LFS PE=1 SV=1
LOC_Os01g50480	3.05433	0.0137162	Up	sp|Q9SPV4|SAMT_CLABR Salicylate carboxymethyltransferase OS=Clarkia breweri OX=36903 GN=SAMT PE=1 SV=1
LOC_Os03g06960	-1.73376	0.0137169	Down	sp|Q9MAS5|VA726_ARATH Putative vesicle-associated membrane protein 726 OS=Arabidopsis thaliana OX=3702 GN=VAMP726 PE=2 SV=2
LOC_Os12g36220	-1.10227	0.0137271	Down	sp|P01053|ICI2_HORVU Subtilisin-chymotrypsin inhibitor-2A OS=Hordeum vulgare OX=4513 PE=1 SV=2
LOC_Os01g19210	-1.03626	0.0140591	Down	sp|P08770|TRA1_MAIZE Putative AC transposase OS=Zea mays OX=4577 PE=2 SV=2
LOC_Os01g70370	4.87352	0.014126	Up	sp|Q8RYL0|LCB2C_ORYSJ Long chain base biosynthesis protein 2c OS=Oryza sativa subsp. japonica OX=39947 GN=Os01g0928700 PE=3 SV=1
LOC_Os11g32420	4.87352	0.014126	Up	sp|Q9LNG5|PPP7L_ARATH Serine/threonine-protein phosphatase 7 long form homolog OS=Arabidopsis thaliana OX=3702 GN=MAIL3 PE=2 SV=1
LOC_Os08g40270	-3.73314	0.0142108	Down	sp|Q9FG33|LRKS5_ARATH Probable L-type lectin-domain containing receptor kinase S.5 OS=Arabidopsis thaliana OX=3702 GN=LECRKS5 PE=2 SV=1
LOC_Os05g04640	1.69433	0.014267	Up	sp|Q9XEC3|WRK42_ARATH WRKY transcription factor 42 OS=Arabidopsis thaliana OX=3702 GN=WRKY42 PE=1 SV=1
LOC_Os12g27800	-1.31559	0.014322	Down	sp|Q9M2U3|ALPL_ARATH Protein ALP1-like OS=Arabidopsis thaliana OX=3702 GN=At3g55350 PE=2 SV=1
LOC_Os05g04390	4.86447	0.0144161	Up	--
LOC_Os04g48850	-1.21808	0.0144751	Down	sp|P31531|1A1C_SOYBN 1-aminocyclopropane-1-carboxylate synthase OS=Glycine max OX=3847 GN=ACS1 PE=2 SV=1
LOC_Os12g35910	2.87571	0.0144942	Up	--
LOC_Os10g05780	4.84182	0.0146201	Up	sp|Q0WP01|PTR9_ARATH Protein NRT1/ PTR FAMILY 5.10 OS=Arabidopsis thaliana OX=3702 GN=NPF5.10 PE=2 SV=1
LOC_Os02g06940	3.84466	0.0146918	Up	sp|Q652P4|CPSF2_ORYSJ Cleavage and polyadenylation specificity factor subunit 2 OS=Oryza sativa subsp. japonica OX=39947 GN=Os09g0569400 PE=2 SV=1
LOC_Os10g06950	1.46512	0.0148101	Up	sp|Q2QSL4|CDKF2_ORYSJ Putative cyclin-dependent kinase F-2 OS=Oryza sativa subsp. japonica OX=39947 GN=CDKF-2 PE=3 SV=1
LOC_Os09g15500	4.84026	0.0148261	Up	sp|Q43729|PER57_ARATH Peroxidase 57 OS=Arabidopsis thaliana OX=3702 GN=PER57 PE=1 SV=1
LOC_Os02g20200	2.79481	0.0148284	Up	sp|P10978|POLX_TOBAC Retrovirus-related Pol polyprotein from transposon TNT 1-94 OS=Nicotiana tabacum OX=4097 PE=2 SV=1
LOC_Os01g73490	1.70614	0.0148439	Up	--
LOC_Os11g05420	1.36744	0.0148687	Up	--
LOC_Os06g06390	1.52344	0.0149434	Up	sp|P0DO07|PIK2_ORYSJ Disease resistance protein Pik-2 OS=Oryza sativa subsp. japonica OX=39947 GN=PIK-2 PE=3 SV=1
LOC_Os01g45140	3.30834	0.0149575	Up	sp|Q9AT54|SCGT_TOBAC Scopoletin glucosyltransferase OS=Nicotiana tabacum OX=4097 GN=TOGT1 PE=1 SV=1
LOC_Os11g47240	1.48532	0.0149832	Up	sp|C0LGP4|Y3475_ARATH Probable LRR receptor-like serine/threonine-protein kinase At3g47570 OS=Arabidopsis thaliana OX=3702 GN=At3g47570 PE=2 SV=1
LOC_Os11g24290	-4.74847	0.0151039	Down	sp|Q9C7Z9|SCP18_ARATH Serine carboxypeptidase-like 18 OS=Arabidopsis thaliana OX=3702 GN=SCPL18 PE=2 SV=2
LOC_Os09g33710	-1.06172	0.0151122	Down	sp|Q0J0G1|BGL33_ORYSJ Probable inactive beta-glucosidase 33 OS=Oryza sativa subsp. japonica OX=39947 GN=BGLU33 PE=2 SV=2
LOC_Os02g12080	4.84476	0.0151262	Up	--
LOC_Os06g21110	4.84476	0.0151262	Up	--
LOC_Os12g10490	1.61077	0.0152197	Up	sp|Q7XA40|RGA3_SOLBU Putative disease resistance protein RGA3 OS=Solanum bulbocastanum OX=147425 GN=RGA3 PE=2 SV=2
LOC_Os07g47460	1.15862	0.0152429	Up	--
LOC_Os01g12680	1.96094	0.0153689	Up	sp|Q9FLV9|SLAH3_ARATH S-type anion channel SLAH3 OS=Arabidopsis thaliana OX=3702 GN=SLAH3 PE=1 SV=1
LOC_Os11g10870	1.27342	0.0155993	Up	sp|Q9C523|DIR19_ARATH Dirigent protein 19 OS=Arabidopsis thaliana OX=3702 GN=DIR19 PE=2 SV=1
LOC_Os06g01890	1.64933	0.0158752	Up	sp|A2Z9Q7|MAD56_ORYSI MADS-box transcription factor 56 OS=Oryza sativa subsp. indica OX=39946 GN=MADS56 PE=2 SV=2
LOC_Os04g52780	-1.66355	0.0159184	Down	sp|Q0JA29|FLS2_ORYSJ LRR receptor-like serine/threonine-protein kinase FLS2 OS=Oryza sativa subsp. japonica OX=39947 GN=FLS2 PE=1 SV=1
LOC_Os05g50390	1.1621	0.0159617	Up	--
LOC_Os08g27620	3.82795	0.016007	Up	--
LOC_Os06g47750	-3.12742	0.0160271	Down	sp|Q9C7S5|PSYR1_ARATH Tyrosine-sulfated glycopeptide receptor 1 OS=Arabidopsis thaliana OX=3702 GN=PSY1R PE=1 SV=1
LOC_Os04g44220	1.02509	0.0162407	Up	sp|F4IUX6|RENT2_ARATH Regulator of nonsense transcripts UPF2 OS=Arabidopsis thaliana OX=3702 GN=UPF2 PE=2 SV=1
LOC_Os06g15600	-4.21371	0.0163695	Down	sp|P60496|BABL_LILLO Chemocyanin OS=Lilium longiflorum OX=4690 PE=1 SV=1
LOC_Os06g32720	1.29985	0.0164269	Up	sp|Q0DBW8|C3H42_ORYSJ Zinc finger CCCH domain-containing protein 42 OS=Oryza sativa subsp. japonica OX=39947 GN=Os06g0519400 PE=2 SV=1
LOC_Os01g69070	1.2723	0.0164732	Up	sp|Q5JLM1|PIN5A_ORYSJ Probable auxin efflux carrier component 5a OS=Oryza sativa subsp. japonica OX=39947 GN=PIN5A PE=2 SV=1
LOC_Os02g55870	1.72705	0.0164897	Up	sp|Q9FZP1|HPSE3_ARATH Heparanase-like protein 3 OS=Arabidopsis thaliana OX=3702 GN=At5g34940 PE=2 SV=2
LOC_Os07g28660	-1.10273	0.0165005	Down	--
LOC_Os05g51570	1.07784	0.0165051	Up	sp|P49044|VPE_VICSA Vacuolar-processing enzyme OS=Vicia sativa OX=3908 PE=1 SV=1
LOC_Os08g12800	1.06469	0.0167118	Up	sp|Q93Z08|E136_ARATH Glucan endo-1,3-beta-glucosidase 6 OS=Arabidopsis thaliana OX=3702 GN=At5g58090 PE=2 SV=2
LOC_Os12g31000	1.05252	0.0167703	Up	sp|Q9C9R6|PUM7_ARATH Putative pumilio homolog 7, chloroplastic OS=Arabidopsis thaliana OX=3702 GN=APUM7 PE=3 SV=2
LOC_Os05g50000	-4.68075	0.016818	Down	--
LOC_Os02g05960	1.10889	0.0169879	Up	sp|Q9C7S5|PSYR1_ARATH Tyrosine-sulfated glycopeptide receptor 1 OS=Arabidopsis thaliana OX=3702 GN=PSY1R PE=1 SV=1
LOC_Os01g06320	-4.65631	0.0170561	Down	sp|Q8RWU3|RVE8_ARATH Protein REVEILLE 8 OS=Arabidopsis thaliana OX=3702 GN=RVE8 PE=2 SV=1
LOC_Os07g48120	1.88218	0.0170758	Up	--
LOC_Os08g40710	4.82819	0.0175482	Up	sp|Q9ZT94|POLR2_ARATH Retrovirus-related Pol polyprotein from transposon RE2 OS=Arabidopsis thaliana OX=3702 GN=RE2 PE=4 SV=1
LOC_Os03g14630	3.78405	0.0175598	Up	--
LOC_Os01g61300	-1.81206	0.0176368	Down	--
LOC_Os03g43470	3.01687	0.0177177	Up	sp|Q9SJG6|PP200_ARATH Pentatricopeptide repeat-containing protein At2g42920, chloroplastic OS=Arabidopsis thaliana OX=3702 GN=PCMP-E75 PE=2 SV=1
LOC_Os09g10740	1.94554	0.0177465	Up	sp|O48528|OP163_ARATH Outer envelope pore protein 16-3, chloroplastic/mitochondrial OS=Arabidopsis thaliana OX=3702 GN=OEP163 PE=1 SV=1
LOC_Os10g09990	1.37199	0.0179029	Up	sp|Q9ZQ94|U73C5_ARATH UDP-glycosyltransferase 73C5 OS=Arabidopsis thaliana OX=3702 GN=UGT73C5 PE=2 SV=1
LOC_Os01g70360	4.83504	0.0179797	Up	sp|Q8RYL1|LCB2B_ORYSJ Long chain base biosynthesis protein 2b OS=Oryza sativa subsp. japonica OX=39947 GN=Os01g0928600 PE=2 SV=1
LOC_Os11g35930	-2.36303	0.0179867	Down	sp|O04111|CHSY_PERFR Chalcone synthase OS=Perilla frutescens OX=48386 GN=CHS PE=2 SV=1
LOC_Os02g37070	1.2149	0.0180701	Up	--
LOC_Os05g41290	2.15061	0.0182019	Up	sp|Q7XA40|RGA3_SOLBU Putative disease resistance protein RGA3 OS=Solanum bulbocastanum OX=147425 GN=RGA3 PE=2 SV=2
LOC_Os08g14070	1.0841	0.0182272	Up	--
LOC_Os04g45300	2.15675	0.0182274	Up	sp|Q7XPY5|BGL15_ORYSJ Putative beta-glucosidase 15 OS=Oryza sativa subsp. japonica OX=39947 GN=BGLU15 PE=5 SV=2
LOC_Os03g56360	3.7882	0.0182776	Up	--
LOC_Os04g28900	-3.66106	0.0183922	Down	--
LOC_Os05g25570	-4.67848	0.0184715	Down	--
LOC_Os11g47460	3.12656	0.0184792	Up	sp|Q53NK6|MYBA1_ORYSJ Myb-related protein MYBAS1 OS=Oryza sativa subsp. japonica OX=39947 GN=MYBAS1 PE=2 SV=1
LOC_Os03g03320	1.19144	0.0185309	Up	--
LOC_Os12g42064	1.15639	0.0185309	Up	--
LOC_Os10g18260	2.19005	0.0185889	Up	sp|O65483|CRK24_ARATH Cysteine-rich receptor-like protein kinase 24 OS=Arabidopsis thaliana OX=3702 GN=CRK24 PE=3 SV=2
LOC_Os12g08200	-4.63688	0.0185987	Down	--
LOC_Os02g41961	1.21662	0.0187184	Up	--
LOC_Os04g15670	1.10472	0.0187895	Up	--
LOC_Os04g54564	1.36948	0.0187911	Up	--
LOC_Os06g43000	-3.18257	0.0188119	Down	sp|Q8S3M3|NOIL_ELAOL NOI-like protein OS=Elaeis oleifera OX=80265 PE=2 SV=1
LOC_Os03g03990	1.03636	0.0188454	Up	sp|Q8LSQ2|SR43C_ORYSJ Probable signal recognition particle 43 kDa protein, chloroplastic OS=Oryza sativa subsp. japonica OX=39947 GN=Os03g0131900 PE=2 SV=1
LOC_Os08g37595	1.48678	0.0188923	Up	--
LOC_Os04g12830	1.80491	0.0189786	Up	sp|Q9M667|RPP13_ARATH Disease resistance protein RPP13 OS=Arabidopsis thaliana OX=3702 GN=RPP13 PE=2 SV=2
LOC_Os12g10580	3.27487	0.0190006	Up	sp|Q6ENG6|RBL_ORYNI Ribulose bisphosphate carboxylase large chain OS=Oryza nivara OX=4536 GN=rbcL PE=3 SV=1
LOC_Os03g58870	1.7292	0.0190194	Up	--
LOC_Os02g57020	1.43495	0.0190269	Up	--
LOC_Os02g37160	1.80835	0.019045	Up	sp|F2VYU4|PIK1_ORYSJ Disease resistance protein Pik-1 OS=Oryza sativa subsp. japonica OX=39947 GN=PIK-1 PE=1 SV=1
LOC_Os12g02000	2.12842	0.0191447	Up	--
LOC_Os06g05410	-1.59208	0.0191503	Down	--
LOC_Os09g24870	-3.60621	0.0191773	Down	--
LOC_Os12g12500	3.78498	0.0192338	Up	--
LOC_Os08g40360	-3.70714	0.0193037	Down	sp|P92523|M860_ARATH Uncharacterized mitochondrial protein AtMg00860 OS=Arabidopsis thaliana OX=3702 GN=AtMg00860 PE=4 SV=1
LOC_Os06g26070	2.42882	0.0196218	Up	sp|P31843|RRPO_OENBE RNA-directed DNA polymerase homolog OS=Oenothera berteroana OX=3950 PE=4 SV=1
LOC_Os11g45350	1.35192	0.0197168	Up	--
LOC_Os08g40240	1.00806	0.0197563	Up	sp|Q9C9K2|CP123_ARATH Calvin cycle protein CP12-3, chloroplastic OS=Arabidopsis thaliana OX=3702 GN=CP12-3 PE=1 SV=1
[truncated: 660 more rows]
